# Supplementary material
Source: publisher site journal article supplement (https://www.spandidos-publications.com/7356/downloadSupplementary)
Supplement: Supplementary file 1 [file downloadSupplementary]

## Sheet: Sheet1
Table SI. Expression data of ETHE1 in clinical samples from The Cancer Genome Atlas (TCGA) and Genotype-Tissue Expression (GTEx) datasets.
Cancer type (number of cases)	Group	Expression	SampleName
GBM(T=153,N=1157)	Tumor	5.4456	TCGA-19-1787-01
GBM(T=153,N=1157)	Tumor	5.7088	TCGA-06-5412-01
GBM(T=153,N=1157)	Tumor	5.1603	TCGA-16-0846-01
GBM(T=153,N=1157)	Tumor	5.5772	TCGA-12-5299-01
GBM(T=153,N=1157)	Tumor	4.3632	TCGA-06-2561-01
GBM(T=153,N=1157)	Tumor	5.4043	TCGA-06-0132-01
GBM(T=153,N=1157)	Tumor	4.1449	TCGA-26-5136-01
GBM(T=153,N=1157)	Tumor	4.3002	TCGA-27-2521-01
GBM(T=153,N=1157)	Tumor	4.594	TCGA-19-2629-01
GBM(T=153,N=1157)	Tumor	5.0769	TCGA-06-0238-01
GBM(T=153,N=1157)	Tumor	5.5522	TCGA-06-0749-01
GBM(T=153,N=1157)	Tumor	5.3639	TCGA-06-0174-01
GBM(T=153,N=1157)	Tumor	5.823	TCGA-06-5414-01
GBM(T=153,N=1157)	Tumor	5.4486	TCGA-28-5207-01
GBM(T=153,N=1157)	Tumor	5.6625	TCGA-06-5410-01
GBM(T=153,N=1157)	Tumor	5.4784	TCGA-06-0747-01
GBM(T=153,N=1157)	Tumor	6.1717	TCGA-28-2513-01
GBM(T=153,N=1157)	Tumor	5.1938	TCGA-76-4927-01
GBM(T=153,N=1157)	Tumor	5.4202	TCGA-06-0645-01
GBM(T=153,N=1157)	Tumor	5.8056	TCGA-06-2565-01
GBM(T=153,N=1157)	Tumor	5.9213	TCGA-06-0130-01
GBM(T=153,N=1157)	Tumor	5.7342	TCGA-06-0750-01
GBM(T=153,N=1157)	Tumor	5.5497	TCGA-27-1831-01
GBM(T=153,N=1157)	Tumor	4.8709	TCGA-06-5416-01
GBM(T=153,N=1157)	Tumor	5.2001	TCGA-06-0141-01
GBM(T=153,N=1157)	Tumor	5.2438	TCGA-06-0125-01
GBM(T=153,N=1157)	Tumor	4.6479	TCGA-76-4925-01
GBM(T=153,N=1157)	Tumor	5.5635	TCGA-76-4932-01
GBM(T=153,N=1157)	Tumor	4.7709	TCGA-28-2510-01
GBM(T=153,N=1157)	Tumor	6.1357	TCGA-06-0743-01
GBM(T=153,N=1157)	Tumor	5.7225	TCGA-14-1034-01
GBM(T=153,N=1157)	Tumor	5.6902	TCGA-06-0184-01
GBM(T=153,N=1157)	Tumor	6.0723	TCGA-12-3652-01
GBM(T=153,N=1157)	Tumor	5.0032	TCGA-26-5132-01
GBM(T=153,N=1157)	Tumor	5.0117	TCGA-32-1970-01
GBM(T=153,N=1157)	Tumor	5.8435	TCGA-06-0219-01
GBM(T=153,N=1157)	Tumor	5.8868	TCGA-14-0787-01
GBM(T=153,N=1157)	Tumor	5.9234	TCGA-06-0190-01
GBM(T=153,N=1157)	Tumor	5.4453	TCGA-26-5135-01
GBM(T=153,N=1157)	Tumor	5.6539	TCGA-76-4931-01
GBM(T=153,N=1157)	Tumor	5.2312	TCGA-41-3915-01
GBM(T=153,N=1157)	Tumor	5.3674	TCGA-06-0649-01
GBM(T=153,N=1157)	Tumor	5.3248	TCGA-12-0618-01
GBM(T=153,N=1157)	Tumor	6.3212	TCGA-27-2524-01
GBM(T=153,N=1157)	Tumor	4.7165	TCGA-28-1753-01
GBM(T=153,N=1157)	Tumor	6.0293	TCGA-12-5295-01
GBM(T=153,N=1157)	Tumor	5.8538	TCGA-27-2523-01
GBM(T=153,N=1157)	Tumor	4.711	TCGA-06-2569-01
GBM(T=153,N=1157)	Tumor	5.4162	TCGA-27-1830-01
GBM(T=153,N=1157)	Tumor	4.7388	TCGA-06-2559-01
GBM(T=153,N=1157)	Tumor	5.9725	TCGA-27-2526-01
GBM(T=153,N=1157)	Tumor	5.2983	TCGA-06-5856-01
GBM(T=153,N=1157)	Tumor	5.3252	TCGA-26-1442-01
GBM(T=153,N=1157)	Tumor	5.8372	TCGA-06-5418-01
GBM(T=153,N=1157)	Tumor	5.278	TCGA-26-5139-01
GBM(T=153,N=1157)	Tumor	4.1044	TCGA-06-5417-01
GBM(T=153,N=1157)	Tumor	1.9712	TCGA-26-5134-01
GBM(T=153,N=1157)	Tumor	5.3941	TCGA-06-5413-01
GBM(T=153,N=1157)	Tumor	5.0566	TCGA-76-4929-01
GBM(T=153,N=1157)	Tumor	5.478	TCGA-06-0646-01
GBM(T=153,N=1157)	Tumor	5.528	TCGA-12-3650-01
GBM(T=153,N=1157)	Tumor	5.254	TCGA-19-2620-01
GBM(T=153,N=1157)	Tumor	5.8169	TCGA-28-5213-01
GBM(T=153,N=1157)	Tumor	5.5448	TCGA-06-0138-01
GBM(T=153,N=1157)	Tumor	5.4631	TCGA-06-5415-01
GBM(T=153,N=1157)	Tumor	5.337	TCGA-06-0139-01
GBM(T=153,N=1157)	Tumor	5.1223	TCGA-02-0047-01
GBM(T=153,N=1157)	Tumor	5.7882	TCGA-14-0789-01
GBM(T=153,N=1157)	Tumor	4.9327	TCGA-12-0616-01
GBM(T=153,N=1157)	Tumor	5.5116	TCGA-32-1982-01
GBM(T=153,N=1157)	Tumor	5.6851	TCGA-28-5220-01
GBM(T=153,N=1157)	Tumor	6.1659	TCGA-14-0817-01
GBM(T=153,N=1157)	Tumor	5.3363	TCGA-12-1597-01
GBM(T=153,N=1157)	Tumor	4.905	TCGA-06-2570-01
GBM(T=153,N=1157)	Tumor	5.91337	TCGA-06-0211-01
GBM(T=153,N=1157)	Tumor	4.7608	TCGA-02-2483-01
GBM(T=153,N=1157)	Tumor	5.35743	TCGA-06-0156-01
GBM(T=153,N=1157)	Tumor	5.0264	TCGA-27-1837-01
GBM(T=153,N=1157)	Tumor	5.9864	TCGA-28-5204-01
GBM(T=153,N=1157)	Tumor	5.3331	TCGA-32-5222-01
GBM(T=153,N=1157)	Tumor	5.6059	TCGA-28-5209-01
GBM(T=153,N=1157)	Tumor	4.5336	TCGA-27-2519-01
GBM(T=153,N=1157)	Tumor	5.1807	TCGA-14-0790-01
GBM(T=153,N=1157)	Tumor	5.0471	TCGA-12-0821-01
GBM(T=153,N=1157)	Tumor	5.3879	TCGA-19-2619-01
GBM(T=153,N=1157)	Tumor	5.1277	TCGA-27-1835-01
GBM(T=153,N=1157)	Tumor	5.1823	TCGA-12-0619-01
GBM(T=153,N=1157)	Tumor	5.6168	TCGA-06-0168-01
GBM(T=153,N=1157)	Tumor	5.281	TCGA-27-2528-01
GBM(T=153,N=1157)	Tumor	5.3858	TCGA-28-5215-01
GBM(T=153,N=1157)	Tumor	5.9869	TCGA-28-5218-01
GBM(T=153,N=1157)	Tumor	5.254	TCGA-14-1825-01
GBM(T=153,N=1157)	Tumor	4.837	TCGA-06-0129-01
GBM(T=153,N=1157)	Tumor	5.3352	TCGA-06-5859-01
GBM(T=153,N=1157)	Tumor	5.322	TCGA-28-1747-01
GBM(T=153,N=1157)	Tumor	6.1755	TCGA-28-2499-01
GBM(T=153,N=1157)	Tumor	5.1615	TCGA-32-1980-01
GBM(T=153,N=1157)	Tumor	5.251	TCGA-06-2564-01
GBM(T=153,N=1157)	Tumor	5.5454	TCGA-06-5408-01
GBM(T=153,N=1157)	Tumor	5.1363	TCGA-27-1832-01
GBM(T=153,N=1157)	Tumor	6.0239	TCGA-14-1829-01
GBM(T=153,N=1157)	Tumor	5.4986	TCGA-32-2615-01
GBM(T=153,N=1157)	Tumor	5.9665	TCGA-06-0158-01
GBM(T=153,N=1157)	Tumor	5.3519	TCGA-28-5216-01
GBM(T=153,N=1157)	Tumor	6.0938	TCGA-41-2572-01
GBM(T=153,N=1157)	Tumor	6.0418	TCGA-02-0055-01
GBM(T=153,N=1157)	Tumor	5.1815	TCGA-32-2634-01
GBM(T=153,N=1157)	Tumor	5.109	TCGA-06-5411-01
GBM(T=153,N=1157)	Tumor	5.4819	TCGA-06-0744-01
GBM(T=153,N=1157)	Tumor	5.8555	TCGA-76-4928-01
GBM(T=153,N=1157)	Tumor	5.6227	TCGA-06-0644-01
GBM(T=153,N=1157)	Tumor	4.9151	TCGA-14-0871-01
GBM(T=153,N=1157)	Tumor	5.0277	TCGA-08-0386-01
GBM(T=153,N=1157)	Tumor	5.565	TCGA-32-2632-01
GBM(T=153,N=1157)	Tumor	5.464	TCGA-06-0882-01
GBM(T=153,N=1157)	Tumor	5.3056	TCGA-41-4097-01
GBM(T=153,N=1157)	Tumor	5.673	TCGA-16-1045-01
GBM(T=153,N=1157)	Tumor	4.8851	TCGA-19-2625-01
GBM(T=153,N=1157)	Tumor	5.2122	TCGA-27-1834-01
GBM(T=153,N=1157)	Tumor	4.4196	TCGA-41-2571-01
GBM(T=153,N=1157)	Tumor	5.3523	TCGA-19-4065-01
GBM(T=153,N=1157)	Tumor	5.3495	TCGA-14-0781-01
GBM(T=153,N=1157)	Tumor	5.6206	TCGA-06-0157-01
GBM(T=153,N=1157)	Tumor	5.3992	TCGA-12-3653-01
GBM(T=153,N=1157)	Tumor	5.1314	TCGA-76-4926-01
GBM(T=153,N=1157)	Tumor	5.1724	TCGA-26-5133-01
GBM(T=153,N=1157)	Tumor	5.3681	TCGA-06-2562-01
GBM(T=153,N=1157)	Tumor	4.0401	TCGA-41-5651-01
GBM(T=153,N=1157)	Tumor	5.0086	TCGA-06-0210-01
GBM(T=153,N=1157)	Tumor	4.3965	TCGA-19-2624-01
GBM(T=153,N=1157)	Tumor	4.8064	TCGA-19-5960-01
GBM(T=153,N=1157)	Tumor	5.2052	TCGA-06-0686-01
GBM(T=153,N=1157)	Tumor	5.5607	TCGA-06-2563-01
GBM(T=153,N=1157)	Tumor	5.0387	TCGA-15-1444-01
GBM(T=153,N=1157)	Tumor	4.3737	TCGA-32-4213-01
GBM(T=153,N=1157)	Tumor	5.4226	TCGA-15-0742-01
GBM(T=153,N=1157)	Tumor	5.7986	TCGA-06-0187-01
GBM(T=153,N=1157)	Tumor	4.3242	TCGA-19-1390-01
GBM(T=153,N=1157)	Tumor	5.432	TCGA-06-2557-01
GBM(T=153,N=1157)	Tumor	5.0036	TCGA-06-0878-01
GBM(T=153,N=1157)	Tumor	5.1571	TCGA-06-2567-01
GBM(T=153,N=1157)	Tumor	5.0414	TCGA-32-2616-01
GBM(T=153,N=1157)	Tumor	5.7722	TCGA-28-5208-01
GBM(T=153,N=1157)	Tumor	4.7903	TCGA-28-2514-01
GBM(T=153,N=1157)	Tumor	4.6866	TCGA-06-1804-01
GBM(T=153,N=1157)	Tumor	6.0275	TCGA-14-2554-01
GBM(T=153,N=1157)	Tumor	5.23	TCGA-02-2485-01
GBM(T=153,N=1157)	Tumor	4.9284	TCGA-06-5858-01
GBM(T=153,N=1157)	Tumor	5.5373	TCGA-06-0178-01
GBM(T=153,N=1157)	Tumor	5.6899	TCGA-14-1823-01
GBM(T=153,N=1157)	Tumor	5.2461	TCGA-28-2509-01
GBM(T=153,N=1157)	Tumor	5.5345	TCGA-06-2558-01
GBM(T=153,N=1157)	Tumor	4.9156	TCGA-06-0745-01
GBM(T=153,N=1157)	Normal	3.4817	GTEX-13QIC-0011-R1a-SM-5O9CJ
GBM(T=153,N=1157)	Normal	4.3765	GTEX-N7MS-2526-SM-26GMA
GBM(T=153,N=1157)	Normal	1.412	GTEX-N7MS-2526-SM-26GMR
GBM(T=153,N=1157)	Normal	4.2906	GTEX-NPJ7-0011-R6a-SM-2I3G7
GBM(T=153,N=1157)	Normal	4.1772	GTEX-132Q8-3026-SM-5PNVG
GBM(T=153,N=1157)	Normal	3.5994	GTEX-NPJ7-2726-SM-2I3FT
GBM(T=153,N=1157)	Normal	3.9801	GTEX-13OVJ-0011-R9b-SM-5L3GD
GBM(T=153,N=1157)	Normal	4.0216	GTEX-XLM4-0011-R10A-SM-4AT5P
GBM(T=153,N=1157)	Normal	3.8511	GTEX-12ZZZ-0011-R10a-SM-5P9HC
GBM(T=153,N=1157)	Normal	2.5137	GTEX-X4XY-0011-R8A-SM-46MVC
GBM(T=153,N=1157)	Normal	3.5449	GTEX-13QJC-0011-R6a-SM-5S2VI
GBM(T=153,N=1157)	Normal	3.9589	GTEX-ZUA1-0011-R8b-SM-51MST
GBM(T=153,N=1157)	Normal	2.409	GTEX-13FHP-0011-R7b-SM-5LZYI
GBM(T=153,N=1157)	Normal	4.2289	GTEX-11EMC-3326-SM-5P9JH
GBM(T=153,N=1157)	Normal	3.9261	GTEX-13112-0011-R7b-SM-5DUVW
GBM(T=153,N=1157)	Normal	4.1539	GTEX-12WSA-0011-R5b-SM-5GU5I
GBM(T=153,N=1157)	Normal	3.7518	GTEX-ZF28-3026-SM-4WKHP
GBM(T=153,N=1157)	Normal	4.251	GTEX-ZUA1-0011-R7b-SM-4YCDP
GBM(T=153,N=1157)	Normal	3.0393	GTEX-11ZVC-0011-R9a-SM-57WC5
GBM(T=153,N=1157)	Normal	3.8857	GTEX-WZTO-0011-R4A-SM-3NMC7
GBM(T=153,N=1157)	Normal	3.9534	GTEX-NPJ7-0011-R11A-SM-2I3E8
GBM(T=153,N=1157)	Normal	4.0575	GTEX-13OVL-0011-R6a-SM-5L3G4
GBM(T=153,N=1157)	Normal	3.8054	GTEX-13NYB-0011-R1b-SM-5KM4F
GBM(T=153,N=1157)	Normal	4.7442	GTEX-WHSE-0011-R8A-SM-3P5Z1
GBM(T=153,N=1157)	Normal	3.6101	GTEX-T6MN-0011-R4A-SM-32QPG
GBM(T=153,N=1157)	Normal	3.5187	GTEX-ZDXO-0011-R1a-SM-4WKF4
GBM(T=153,N=1157)	Normal	4.0985	GTEX-11DXY-3226-SM-5GIDE
GBM(T=153,N=1157)	Normal	3.0978	GTEX-ZV68-0011-R5a-SM-4YCDW
GBM(T=153,N=1157)	Normal	3.8013	GTEX-11GSP-0011-R6b-SM-57WBQ
GBM(T=153,N=1157)	Normal	3.6405	GTEX-13OVL-0011-R3b-SM-5L3I8
GBM(T=153,N=1157)	Normal	3.7867	GTEX-13OW7-0011-R5b-SM-5O9DM
GBM(T=153,N=1157)	Normal	4.8022	GTEX-11WQK-3126-SM-5EGI2
GBM(T=153,N=1157)	Normal	3.7356	GTEX-ZE9C-0011-R11a-SM-4WKGG
GBM(T=153,N=1157)	Normal	3.8837	GTEX-ZZPT-2926-SM-5EQ5S
GBM(T=153,N=1157)	Normal	4.2563	GTEX-12ZZY-3026-SM-5GCOU
GBM(T=153,N=1157)	Normal	5.0549	GTEX-WHSE-2926-SM-3NMBG
GBM(T=153,N=1157)	Normal	3.9031	GTEX-12ZZW-2926-SM-5LZUP
GBM(T=153,N=1157)	Normal	3.8167	GTEX-12WSD-0011-R9a-SM-5GU6W
GBM(T=153,N=1157)	Normal	4.4964	GTEX-YFC4-0011-R11a-SM-4SOK6
GBM(T=153,N=1157)	Normal	3.794	GTEX-X261-0011-R5A-SM-3NMB4
GBM(T=153,N=1157)	Normal	4.0926	GTEX-11OC5-0626-SM-5HL6M
GBM(T=153,N=1157)	Normal	3.6359	GTEX-ZVZQ-0011-R7b-SM-57WBB
GBM(T=153,N=1157)	Normal	3.3379	GTEX-12ZZX-0011-R8a-SM-5DUW8
GBM(T=153,N=1157)	Normal	3.3221	GTEX-13PDP-0011-R1a-SM-5PNX5
GBM(T=153,N=1157)	Normal	4.0419	GTEX-11TTK-2926-SM-5PNYP
GBM(T=153,N=1157)	Normal	4.0558	GTEX-N7MS-0011-R3a-SM-5SI8H
GBM(T=153,N=1157)	Normal	3.7909	GTEX-T6MN-2626-SM-32PMQ
GBM(T=153,N=1157)	Normal	4.4706	GTEX-12WS9-0011-R5b-SM-5P9EV
GBM(T=153,N=1157)	Normal	3.5098	GTEX-NL4W-0011-R9a-SM-2I3G1
GBM(T=153,N=1157)	Normal	3.3563	GTEX-13X6J-3026-SM-5Q5CU
GBM(T=153,N=1157)	Normal	3.6066	GTEX-145LS-0011-R10a-SM-5PNUQ
GBM(T=153,N=1157)	Normal	4.018	GTEX-13OVL-0011-R10a-SM-5L3GS
GBM(T=153,N=1157)	Normal	3.9166	GTEX-14BIL-0011-R10a-SM-5SI75
GBM(T=153,N=1157)	Normal	3.8905	GTEX-13FLV-0011-R10b-SM-5LZZ2
GBM(T=153,N=1157)	Normal	3.97	GTEX-13FLW-0011-R6b-SM-5L3EN
GBM(T=153,N=1157)	Normal	3.9599	GTEX-NL4W-0011-R10A-SM-2I3DY
GBM(T=153,N=1157)	Normal	4.6921	GTEX-S7SE-0011-R7A-SM-2XCDI
GBM(T=153,N=1157)	Normal	4.0756	GTEX-139UC-0011-R7a-SM-5IJCV
GBM(T=153,N=1157)	Normal	4.1899	GTEX-RNOR-0011-R4A-SM-3GAD3
GBM(T=153,N=1157)	Normal	4.4996	GTEX-13FHO-2926-SM-5L3ES
GBM(T=153,N=1157)	Normal	1.4911	GTEX-ZE7O-0011-R1a-SM-57WDM
GBM(T=153,N=1157)	Normal	4.3111	GTEX-11ZUS-2826-SM-5EQKW
GBM(T=153,N=1157)	Normal	4.5098	GTEX-WVLH-0011-R11A-SM-3MJFO
GBM(T=153,N=1157)	Normal	2.8602	GTEX-13IVO-0011-R5a-SM-5L3CY
GBM(T=153,N=1157)	Normal	3.0585	GTEX-11WQC-0011-R5a-SM-5BC74
GBM(T=153,N=1157)	Normal	4.0636	GTEX-R55F-1326-SM-5S2V4
GBM(T=153,N=1157)	Normal	-9.9658	GTEX-T6MN-0011-R7A-SM-5CHSP
GBM(T=153,N=1157)	Normal	3.8431	GTEX-RNOR-0011-R3A-SM-5SI8E
GBM(T=153,N=1157)	Normal	3.8905	GTEX-13QIC-0011-R10a-SM-5O9C7
GBM(T=153,N=1157)	Normal	2.8442	GTEX-13QJC-0011-R7b-SM-5PNUM
GBM(T=153,N=1157)	Normal	3.6759	GTEX-12WSD-3126-SM-5HL7P
GBM(T=153,N=1157)	Normal	2.5924	GTEX-13OVL-0011-R4b-SM-5L3HV
GBM(T=153,N=1157)	Normal	3.3379	GTEX-13X6I-0011-R2b-SM-5PNWQ
GBM(T=153,N=1157)	Normal	4.1002	GTEX-1313W-0011-R8a-SM-5DUVM
GBM(T=153,N=1157)	Normal	4.284	GTEX-12ZZX-0011-R2a-SM-5EGLG
GBM(T=153,N=1157)	Normal	4.3992	GTEX-X261-0011-R11A-SM-4E3JY
GBM(T=153,N=1157)	Normal	3.2707	GTEX-13X6J-0011-R8b-SM-5PNUA
GBM(T=153,N=1157)	Normal	3.2766	GTEX-ZF28-0011-R11a-SM-4WWEI
GBM(T=153,N=1157)	Normal	4.0037	GTEX-ZF28-2926-SM-4WKG1
GBM(T=153,N=1157)	Normal	4.5261	GTEX-13OVJ-0011-R3b-SM-5P9H6
GBM(T=153,N=1157)	Normal	4.0162	GTEX-XOTO-0011-R11B-SM-4B64O
GBM(T=153,N=1157)	Normal	3.4648	GTEX-ZVZQ-0011-R9a-SM-51MRH
GBM(T=153,N=1157)	Normal	3.2841	GTEX-X261-0011-R7A-SM-4E3JJ
GBM(T=153,N=1157)	Normal	4.1178	GTEX-ZYY3-3026-SM-5GIEJ
GBM(T=153,N=1157)	Normal	2.9262	GTEX-12WSM-0011-R1a-SM-5LZW6
GBM(T=153,N=1157)	Normal	2.9544	GTEX-13IVO-0011-R3b-SM-5IJBJ
GBM(T=153,N=1157)	Normal	4.0383	GTEX-13CZV-0011-R10b-SM-5LZYD
GBM(T=153,N=1157)	Normal	1.642	GTEX-145MI-0011-R7b-SM-5Q5AZ
GBM(T=153,N=1157)	Normal	3.2572	GTEX-13OW7-0011-R3a-SM-5O9DA
GBM(T=153,N=1157)	Normal	5.0175	GTEX-QVJO-0011-R7A-SM-2S1QO
GBM(T=153,N=1157)	Normal	3.8759	GTEX-RNOR-0011-R1A-SM-5SI8F
GBM(T=153,N=1157)	Normal	4.3632	GTEX-13JVG-0011-R11a-SM-5KM53
GBM(T=153,N=1157)	Normal	2.6579	GTEX-11WQC-0011-R6a-SM-5BC77
GBM(T=153,N=1157)	Normal	4.1595	GTEX-13JUV-0011-R9a-SM-5LZX3
GBM(T=153,N=1157)	Normal	4.1883	GTEX-WL46-0011-R7A-SM-3LK7X
GBM(T=153,N=1157)	Normal	3.3869	GTEX-13FTZ-0011-R10b-SM-5KLZS
GBM(T=153,N=1157)	Normal	4.0348	GTEX-145MH-0011-R10b-SM-5PNUK
GBM(T=153,N=1157)	Normal	4.2134	GTEX-12WSF-0011-R6b-SM-5HL8W
GBM(T=153,N=1157)	Normal	3.7432	GTEX-13FXS-0011-R2b-SM-5K7XX
GBM(T=153,N=1157)	Normal	3.9242	GTEX-RNOR-0011-R5A-SM-2TF4J
GBM(T=153,N=1157)	Normal	3.0446	GTEX-TSE9-0011-R9A-SM-3DB7Q
GBM(T=153,N=1157)	Normal	1.9786	GTEX-RVPU-0011-R11A-SM-2XCAF
GBM(T=153,N=1157)	Normal	5.5485	GTEX-X4EP-0011-R6A-SM-3P629
GBM(T=153,N=1157)	Normal	3.5249	GTEX-Y8DK-0011-R3A-SM-4RTW5
GBM(T=153,N=1157)	Normal	3.6497	GTEX-13IVO-2926-SM-5L3CZ
GBM(T=153,N=1157)	Normal	3.4881	GTEX-ZVT3-0011-R11b-SM-57WBI
GBM(T=153,N=1157)	Normal	4.3688	GTEX-13OVL-3026-SM-5IJF1
GBM(T=153,N=1157)	Normal	3.2328	GTEX-1445S-0011-R5a-SM-5PNUS
GBM(T=153,N=1157)	Normal	4.1708	GTEX-13OVJ-0011-R7a-SM-5L3G1
GBM(T=153,N=1157)	Normal	4.6668	GTEX-13OVH-0011-R11b-SM-5KM4X
GBM(T=153,N=1157)	Normal	3.5424	GTEX-11WQC-0011-R10a-SM-57WCT
GBM(T=153,N=1157)	Normal	3.5199	GTEX-11NV4-2126-SM-5N9DS
GBM(T=153,N=1157)	Normal	3.5349	GTEX-13X6I-0011-R3b-SM-5P9HM
GBM(T=153,N=1157)	Normal	4.3723	GTEX-Y111-2826-SM-4TT3O
GBM(T=153,N=1157)	Normal	3.4371	GTEX-13O3O-0011-R3b-SM-5KM3R
GBM(T=153,N=1157)	Normal	4.1748	GTEX-ZE9C-0011-R9a-SM-4WWCY
GBM(T=153,N=1157)	Normal	4.4983	GTEX-13X6K-0011-R11a-SM-5P9F5
GBM(T=153,N=1157)	Normal	4.0739	GTEX-12ZZX-0011-R10b-SM-5DUWK
GBM(T=153,N=1157)	Normal	4.197	GTEX-12WSA-0011-R8a-SM-5P9EX
GBM(T=153,N=1157)	Normal	4.2818	TCGA-06-AABW-11
GBM(T=153,N=1157)	Normal	3.9892	GTEX-X4XX-0011-R1B-SM-3P622
GBM(T=153,N=1157)	Normal	3.3278	GTEX-13JVG-0011-R3b-SM-5LZXF
GBM(T=153,N=1157)	Normal	3.3856	GTEX-ZAB4-0011-R6a-SM-4SOKD
GBM(T=153,N=1157)	Normal	3.6417	GTEX-N7MT-0011-R2a-SM-2I3GI
GBM(T=153,N=1157)	Normal	4.4726	GTEX-13OW6-2926-SM-5KM29
GBM(T=153,N=1157)	Normal	3.6497	GTEX-12ZZW-0011-R5a-SM-5DUVN
GBM(T=153,N=1157)	Normal	3.1442	GTEX-S7SE-0011-R4A-SM-2XCDB
GBM(T=153,N=1157)	Normal	3.0671	GTEX-ZXG5-0011-R10a-SM-57WDD
GBM(T=153,N=1157)	Normal	4.3862	GTEX-13FLV-0011-R6a-SM-5KLZ4
GBM(T=153,N=1157)	Normal	4.5988	GTEX-ZAB4-0011-R7a-SM-4SOKE
GBM(T=153,N=1157)	Normal	3.3478	GTEX-OHPN-0011-R10A-SM-33HBU
GBM(T=153,N=1157)	Normal	4.4243	GTEX-13RTJ-0011-R7b-SM-5P9JS
GBM(T=153,N=1157)	Normal	4.2578	GTEX-12WSC-2926-SM-5BC5Z
GBM(T=153,N=1157)	Normal	4.3406	GTEX-13OVJ-0011-R10b-SM-5L3HT
GBM(T=153,N=1157)	Normal	3.2915	GTEX-12ZZX-0011-R5a-SM-5HL89
GBM(T=153,N=1157)	Normal	4.0216	GTEX-145LS-0011-R7a-SM-5PNWM
GBM(T=153,N=1157)	Normal	4.382	GTEX-N7MT-1226-SM-2TC6K
GBM(T=153,N=1157)	Normal	3.2737	GTEX-X261-0011-R6B-SM-4E3J8
GBM(T=153,N=1157)	Normal	3.9194	GTEX-13X6K-0011-R4b-SM-5P9HO
GBM(T=153,N=1157)	Normal	3.3897	GTEX-1445S-0011-R8a-SM-5PNWX
GBM(T=153,N=1157)	Normal	4.3737	GTEX-1128S-2826-SM-5N9DI
GBM(T=153,N=1157)	Normal	4.7619	GTEX-WWYW-0011-R6A-SM-3NB3G
GBM(T=153,N=1157)	Normal	3.3076	GTEX-147GR-0011-R4a-SM-5S2V2
GBM(T=153,N=1157)	Normal	4.6083	GTEX-12WSB-0011-R6b-SM-5GU6J
GBM(T=153,N=1157)	Normal	4.1891	GTEX-ZAK1-3026-SM-5S2MJ
GBM(T=153,N=1157)	Normal	3.2096	GTEX-13S7M-0011-R7a-SM-5O9DK
GBM(T=153,N=1157)	Normal	3.3061	GTEX-ZVT3-0011-R10b-SM-57WB6
GBM(T=153,N=1157)	Normal	3.2944	GTEX-QDT8-0011-R6A-SM-32PKI
GBM(T=153,N=1157)	Normal	4.0225	GTEX-11PRG-2826-SM-5BC54
GBM(T=153,N=1157)	Normal	2.9013	GTEX-ZE7O-0011-R6a-SM-57WCI
GBM(T=153,N=1157)	Normal	3.2205	GTEX-12WSM-0011-R8a-SM-5DUWJ
GBM(T=153,N=1157)	Normal	2.7029	GTEX-13PDP-0011-R8b-SM-5O9CS
GBM(T=153,N=1157)	Normal	3.3407	GTEX-13NYB-0011-R8a-SM-5KM4R
GBM(T=153,N=1157)	Normal	4.1228	GTEX-P44H-0011-R5A-SM-2XCEX
GBM(T=153,N=1157)	Normal	4.1506	GTEX-13SLW-0011-R10a-SM-5S2UI
GBM(T=153,N=1157)	Normal	2.6805	GTEX-Q2AG-0011-R9A-SM-2HMJ6
GBM(T=153,N=1157)	Normal	4.1236	GTEX-14BIM-0011-R6b-SM-5S2VB
GBM(T=153,N=1157)	Normal	4.3263	GTEX-144FL-3026-SM-5O99C
GBM(T=153,N=1157)	Normal	3.668	GTEX-13FLV-0011-R8a-SM-5LZZE
GBM(T=153,N=1157)	Normal	3.5009	GTEX-13CF2-0011-R8b-SM-5IJCX
GBM(T=153,N=1157)	Normal	3.6125	GTEX-131YS-3126-SM-5KLYT
GBM(T=153,N=1157)	Normal	3.5299	GTEX-13OW7-3026-SM-5L3GY
GBM(T=153,N=1157)	Normal	3.9847	GTEX-13SLX-0011-R8b-SM-5PNWZ
GBM(T=153,N=1157)	Normal	3.3814	GTEX-139T8-0011-R4a-SM-5HL54
GBM(T=153,N=1157)	Normal	3.4868	GTEX-145LU-0011-R3a-SM-5P9K2
GBM(T=153,N=1157)	Normal	4.7976	GTEX-WHSE-0011-R2A-SM-3P5ZL
GBM(T=153,N=1157)	Normal	3.9506	GTEX-13FXS-0011-R5b-SM-5LZYE
GBM(T=153,N=1157)	Normal	4.3667	GTEX-13N2G-0011-R9b-SM-5MR4E
GBM(T=153,N=1157)	Normal	4.0046	GTEX-13O3O-3126-SM-5KM3H
GBM(T=153,N=1157)	Normal	3.5022	GTEX-13NZA-0011-R11b-SM-5KM4W
GBM(T=153,N=1157)	Normal	4.9946	GTEX-13FLV-0011-R11a-SM-5LZZ7
GBM(T=153,N=1157)	Normal	3.5742	GTEX-13OW8-0011-R3a-SM-5L3I4
GBM(T=153,N=1157)	Normal	3.8033	GTEX-S7SE-0011-R5A-SM-2XCDA
GBM(T=153,N=1157)	Normal	4.1498	GTEX-13X6I-0011-R5a-SM-5PNWW
GBM(T=153,N=1157)	Normal	3.7561	GTEX-NPJ7-0011-R8a-SM-2I3G2
GBM(T=153,N=1157)	Normal	3.7006	GTEX-X4XX-0011-R8B-SM-46MWM
GBM(T=153,N=1157)	Normal	4.1867	GTEX-WVLH-0011-R5A-SM-3MJFW
GBM(T=153,N=1157)	Normal	3.8441	GTEX-13FLW-0011-R5a-SM-5LZX6
GBM(T=153,N=1157)	Normal	4.3883	GTEX-R55E-2526-SM-2TC6H
GBM(T=153,N=1157)	Normal	4.431	GTEX-11ZTS-3226-SM-5EGID
GBM(T=153,N=1157)	Normal	4.2064	GTEX-13N2G-0011-R4b-SM-5MR54
GBM(T=153,N=1157)	Normal	3.011	GTEX-YJ89-0011-R7a-SM-4V6GO
GBM(T=153,N=1157)	Normal	2.8602	GTEX-UTHO-0011-R3A-SM-3GIK8
GBM(T=153,N=1157)	Normal	4.4881	GTEX-13O3Q-0011-R6a-SM-5KM2V
GBM(T=153,N=1157)	Normal	3.6509	GTEX-N7MT-0011-R4a-SM-2I3G9
GBM(T=153,N=1157)	Normal	2.667	GTEX-ZXG5-0011-R7b-SM-57WCC
GBM(T=153,N=1157)	Normal	4.4894	GTEX-ZAB4-0011-R5a-SM-4SOKC
GBM(T=153,N=1157)	Normal	5.191	GTEX-X4EP-0011-R7B-SM-4PQZW
GBM(T=153,N=1157)	Normal	4.2803	GTEX-139UC-0011-R6b-SM-5K7Z1
GBM(T=153,N=1157)	Normal	3.3619	GTEX-12WSC-0011-R9a-SM-5GU4U
GBM(T=153,N=1157)	Normal	4.0269	GTEX-P44G-0011-R5A-SM-2I3FA
GBM(T=153,N=1157)	Normal	3.2541	GTEX-11WQK-0011-R9b-SM-5BC6N
GBM(T=153,N=1157)	Normal	5.4903	GTEX-X4EP-0011-R2B-SM-3P625
GBM(T=153,N=1157)	Normal	4.096	GTEX-13NYB-3226-SM-5J2ND
GBM(T=153,N=1157)	Normal	3.6474	GTEX-11H98-0011-R8a-SM-5NQ8V
GBM(T=153,N=1157)	Normal	4.4523	GTEX-N7MS-2526-SM-2D7W3
GBM(T=153,N=1157)	Normal	4.3046	GTEX-13N1W-0011-R11a-SM-5MR3D
GBM(T=153,N=1157)	Normal	3.9856	GTEX-13PLJ-0011-R9b-SM-5O9DV
GBM(T=153,N=1157)	Normal	2.824	GTEX-13PLJ-0011-R5a-SM-5O9BG
GBM(T=153,N=1157)	Normal	4.3855	GTEX-144GL-2926-SM-5O99F
GBM(T=153,N=1157)	Normal	4.0287	GTEX-XOTO-2926-SM-4B65G
GBM(T=153,N=1157)	Normal	4.2001	GTEX-S7SE-0011-R10A-SM-2XCDF
GBM(T=153,N=1157)	Normal	4.4764	GTEX-139TT-2626-SM-5LZUB
GBM(T=153,N=1157)	Normal	4.6674	GTEX-X4XX-0011-R2A-SM-3P623
GBM(T=153,N=1157)	Normal	4.5236	GTEX-OHPN-0011-R9A-SM-4DXUH
GBM(T=153,N=1157)	Normal	3.8126	GTEX-ZVZQ-0011-R11a-SM-51MS6
GBM(T=153,N=1157)	Normal	3.3379	GTEX-13CF2-0011-R7b-SM-5K7UV
GBM(T=153,N=1157)	Normal	2.2842	GTEX-13PL6-0011-R6a-SM-5O9C5
GBM(T=153,N=1157)	Normal	4.2958	GTEX-YFC4-0011-R2a-SM-4V6DZ
GBM(T=153,N=1157)	Normal	4.1441	GTEX-QVJO-0011-R2A-SM-2S1QK
GBM(T=153,N=1157)	Normal	4.2899	GTEX-131YS-0011-R9b-SM-5EQLY
GBM(T=153,N=1157)	Normal	3.245	GTEX-145MG-0011-R3b-SM-5SI67
GBM(T=153,N=1157)	Normal	3.2313	GTEX-OXRO-0011-R2A-SM-3NB1W
GBM(T=153,N=1157)	Normal	3.9393	GTEX-QVUS-2826-SM-3GADB
GBM(T=153,N=1157)	Normal	4.3002	GTEX-11GSP-0011-R5a-SM-57WBE
GBM(T=153,N=1157)	Normal	2.7931	GTEX-ZVT3-0011-R3b-SM-51MTJ
GBM(T=153,N=1157)	Normal	4.3162	GTEX-Z93S-0011-R11a-SM-4RGNN
GBM(T=153,N=1157)	Normal	3.6646	GTEX-11GS4-3126-SM-5A5LH
GBM(T=153,N=1157)	Normal	4.1203	GTEX-13FHO-0011-R7b-SM-5LZXD
GBM(T=153,N=1157)	Normal	4.2751	GTEX-13FHO-3026-SM-5J1O9
GBM(T=153,N=1157)	Normal	3.97	GTEX-P44G-0011-R2A-SM-2XCD2
GBM(T=153,N=1157)	Normal	3.1669	GTEX-13RTL-0011-R1a-SM-5PNZ8
GBM(T=153,N=1157)	Normal	4.2654	GTEX-12WSF-0011-R11a-SM-5LZVT
GBM(T=153,N=1157)	Normal	3.5887	GTEX-13112-0011-R6b-SM-5DUVK
GBM(T=153,N=1157)	Normal	3.9645	GTEX-13OVL-0011-R11b-SM-5L3G7
GBM(T=153,N=1157)	Normal	4.1668	GTEX-ZAJG-3126-SM-5HL9J
GBM(T=153,N=1157)	Normal	4.0549	GTEX-P44G-0011-R1A-SM-2I3FE
GBM(T=153,N=1157)	Normal	4.565	GTEX-1192X-3126-SM-5N9BY
GBM(T=153,N=1157)	Normal	4.1563	GTEX-13N2G-0011-R1b-SM-5MR3G
GBM(T=153,N=1157)	Normal	2.7401	GTEX-ZV68-0011-R6a-SM-51MSR
GBM(T=153,N=1157)	Normal	3.755	GTEX-QVUS-0011-R3A-SM-3GAFD
GBM(T=153,N=1157)	Normal	4.2017	GTEX-OHPN-0011-R9A-SM-2YUMN
GBM(T=153,N=1157)	Normal	3.1892	GTEX-13SLW-0011-R1a-SM-5S2W7
GBM(T=153,N=1157)	Normal	4.3024	GTEX-N7MT-0011-R7a-SM-2I3FZ
GBM(T=153,N=1157)	Normal	3.2282	GTEX-13IVO-0011-R8a-SM-5L3DY
GBM(T=153,N=1157)	Normal	4.2921	GTEX-Q2AG-0011-R11A-SM-2HMKZ
GBM(T=153,N=1157)	Normal	2.8178	GTEX-144GL-0011-R5b-SM-5PNUJ
GBM(T=153,N=1157)	Normal	3.7324	GTEX-144GL-0011-R3a-SM-5P9HP
GBM(T=153,N=1157)	Normal	3.7335	GTEX-R55E-0011-R9A-SM-2TC6C
GBM(T=153,N=1157)	Normal	4.756	GTEX-13X6J-0011-R11a-SM-5P9HE
GBM(T=153,N=1157)	Normal	3.4881	GTEX-R55F-1226-SM-2TF59
GBM(T=153,N=1157)	Normal	3.4224	GTEX-13CZV-0011-R11b-SM-5N9FN
GBM(T=153,N=1157)	Normal	3.6916	GTEX-144GO-0011-R5a-SM-5PNUR
GBM(T=153,N=1157)	Normal	3.7149	GTEX-N7MT-0011-R3a-SM-2I3GC
GBM(T=153,N=1157)	Normal	4.245	GTEX-132Q8-0011-R10b-SM-5DUWZ
GBM(T=153,N=1157)	Normal	2.3704	GTEX-13PL6-0011-R9b-SM-5O9CH
GBM(T=153,N=1157)	Normal	3.5411	GTEX-QMR6-0011-R11A-SM-32PKK
GBM(T=153,N=1157)	Normal	3.3119	GTEX-ZDXO-0011-R8a-SM-4WWD7
GBM(T=153,N=1157)	Normal	3.6905	GTEX-11EMC-3226-SM-5EGKW
GBM(T=153,N=1157)	Normal	4.3198	GTEX-P44G-0011-R3A-SM-2I3FC
GBM(T=153,N=1157)	Normal	3.1079	GTEX-12ZZW-0011-R10b-SM-5HL9X
GBM(T=153,N=1157)	Normal	3.1939	GTEX-12WSE-0011-R6b-SM-5LZV5
GBM(T=153,N=1157)	Normal	2.3732	GTEX-13FHP-0011-R1b-SM-5K7XL
GBM(T=153,N=1157)	Normal	4.1169	GTEX-XMD1-0011-R10A-SM-4AT4A
GBM(T=153,N=1157)	Normal	2.945	GTEX-12WSD-0011-R3b-SM-5LZWN
GBM(T=153,N=1157)	Normal	3.9308	GTEX-WZTO-0011-R8A-SM-4E3II
GBM(T=153,N=1157)	Normal	4.0278	GTEX-13FXS-0011-R9a-SM-5K7UI
GBM(T=153,N=1157)	Normal	4.2706	GTEX-13O3Q-0011-R10b-SM-5KM39
GBM(T=153,N=1157)	Normal	3.944	GTEX-131YS-0011-R4a-SM-5DUVL
GBM(T=153,N=1157)	Normal	4.9937	GTEX-13N2G-0011-R10a-SM-5MR34
GBM(T=153,N=1157)	Normal	3.3577	GTEX-13OW8-0011-R6b-SM-5L3I3
GBM(T=153,N=1157)	Normal	4.1515	GTEX-13FLV-0011-R4a-SM-5LZYU
GBM(T=153,N=1157)	Normal	3.8095	GTEX-ZVZQ-0011-R10b-SM-51MRT
GBM(T=153,N=1157)	Normal	3.7453	GTEX-131XH-0011-R1a-SM-5DUWA
GBM(T=153,N=1157)	Normal	3.728	GTEX-P44H-0011-R10A-SM-2XCEK
GBM(T=153,N=1157)	Normal	2.9765	GTEX-13OW7-0011-R4b-SM-5O9CX
GBM(T=153,N=1157)	Normal	3.5779	GTEX-13OVH-0011-R6b-SM-5LUAX
GBM(T=153,N=1157)	Normal	4.9069	GTEX-13NYS-0011-R9b-SM-5MR44
GBM(T=153,N=1157)	Normal	2.299	GTEX-RU72-0011-R10A-SM-2TF6D
GBM(T=153,N=1157)	Normal	4.2676	GTEX-13OVJ-2826-SM-5L3GW
GBM(T=153,N=1157)	Normal	4.3442	GTEX-11GSO-3026-SM-5Q5AL
GBM(T=153,N=1157)	Normal	4.47	GTEX-WHSE-0011-R1A-SM-3P5ZK
GBM(T=153,N=1157)	Normal	-9.9658	GTEX-T6MN-0011-R4A-SM-5CHSD
GBM(T=153,N=1157)	Normal	3.7561	GTEX-ZUA1-3026-SM-59HJC
GBM(T=153,N=1157)	Normal	3.4804	GTEX-11GSP-0011-R8b-SM-5NQ79
GBM(T=153,N=1157)	Normal	2.3981	GTEX-YJ89-0011-R2b-SM-4RGLT
GBM(T=153,N=1157)	Normal	4.2684	GTEX-Q2AG-0011-R10A-SM-2HMLA
GBM(T=153,N=1157)	Normal	4.0153	GTEX-WL46-0011-R5A-SM-3LK6V
GBM(T=153,N=1157)	Normal	3.2065	GTEX-145MG-0011-R7b-SM-5P9JY
GBM(T=153,N=1157)	Normal	5.3274	GTEX-X4EP-0011-R9B-SM-4QASI
GBM(T=153,N=1157)	Normal	4.5565	GTEX-13112-2926-SM-5DUWT
GBM(T=153,N=1157)	Normal	-9.9658	GTEX-TSE9-0011-R7A-SM-5CHS2
GBM(T=153,N=1157)	Normal	2.0946	GTEX-11WQC-0011-R7b-SM-5BC7A
GBM(T=153,N=1157)	Normal	3.5657	GTEX-12ZZZ-0011-R7b-SM-5EGLE
GBM(T=153,N=1157)	Normal	2.4675	GTEX-13RTL-0011-R3a-SM-5P9JP
GBM(T=153,N=1157)	Normal	4.5796	GTEX-13FHO-0011-R11b-SM-5LZYQ
GBM(T=153,N=1157)	Normal	4.6212	GTEX-Q2AG-0011-R5A-SM-2HMJH
GBM(T=153,N=1157)	Normal	3.7237	GTEX-13OVH-0011-R8b-SM-5MR35
GBM(T=153,N=1157)	Normal	4.0082	GTEX-147GR-0011-R6b-SM-5S2RO
GBM(T=153,N=1157)	Normal	4.7955	GTEX-132Q8-0011-R5a-SM-5IJDM
GBM(T=153,N=1157)	Normal	4.0436	GTEX-WZTO-0011-R5B-SM-3NMC5
GBM(T=153,N=1157)	Normal	2.8321	GTEX-11ONC-0011-R1a-SM-57WD4
GBM(T=153,N=1157)	Normal	4.0985	GTEX-14BIN-0011-R10a-SM-5S2UA
GBM(T=153,N=1157)	Normal	4.425	GTEX-T2IS-0011-R6A-SM-32QP2
GBM(T=153,N=1157)	Normal	3.6066	GTEX-144GL-0011-R8a-SM-5Q5B1
GBM(T=153,N=1157)	Normal	4.2126	GTEX-13QIC-3026-SM-5LU58
GBM(T=153,N=1157)	Normal	3.8147	GTEX-1313W-0011-R10b-SM-5DUXA
GBM(T=153,N=1157)	Normal	4.1359	GTEX-YFC4-0011-R9a-SM-4SOK4
GBM(T=153,N=1157)	Normal	3.8591	GTEX-13O3Q-2926-SM-5KM45
GBM(T=153,N=1157)	Normal	3.6172	GTEX-12126-0011-R9b-SM-5BC6P
GBM(T=153,N=1157)	Normal	3.3814	GTEX-ZXG5-0011-R5b-SM-57WBN
GBM(T=153,N=1157)	Normal	3.2174	GTEX-13OW7-0011-R1b-SM-5L3HF
GBM(T=153,N=1157)	Normal	2.9032	GTEX-13112-0011-R5b-SM-5DUV8
GBM(T=153,N=1157)	Normal	4.4081	GTEX-T6MN-0011-R6A-SM-32QP8
GBM(T=153,N=1157)	Normal	2.8219	GTEX-12584-0011-R6a-SM-5NQ7C
GBM(T=153,N=1157)	Normal	4.0549	GTEX-13PDP-2926-SM-5N9E8
GBM(T=153,N=1157)	Normal	3.8391	GTEX-ZE9C-0011-R5a-SM-5EGLO
GBM(T=153,N=1157)	Normal	4.3278	GTEX-139UC-0011-R3b-SM-5K7VZ
GBM(T=153,N=1157)	Normal	4.3213	GTEX-12WSC-0011-R10a-SM-5GU57
GBM(T=153,N=1157)	Normal	4.3492	GTEX-117XS-3126-SM-5GIDP
GBM(T=153,N=1157)	Normal	3.3911	GTEX-XOTO-0011-R8A-SM-4B65J
GBM(T=153,N=1157)	Normal	3.8431	GTEX-11H98-0011-R10b-SM-5NQ98
GBM(T=153,N=1157)	Normal	3.7582	GTEX-11OF3-0011-R7a-SM-57WCG
GBM(T=153,N=1157)	Normal	4.2533	GTEX-14ASI-3026-SM-5S2PN
GBM(T=153,N=1157)	Normal	4.402	GTEX-NPJ8-2626-SM-26GMI
GBM(T=153,N=1157)	Normal	3.8729	GTEX-13CIG-0011-R9a-SM-5K7VU
GBM(T=153,N=1157)	Normal	4.3356	GTEX-WWYW-0011-R1A-SM-3TW8G
GBM(T=153,N=1157)	Normal	3.7248	GTEX-NL4W-0011-R6a-SM-2I3GA
GBM(T=153,N=1157)	Normal	3.6405	GTEX-NPJ7-0011-R10A-SM-2I3E5
GBM(T=153,N=1157)	Normal	3.5149	GTEX-13NYB-0011-R7a-SM-5MR5D
GBM(T=153,N=1157)	Normal	3.2328	GTEX-13FLW-0011-R8b-SM-5J1MZ
GBM(T=153,N=1157)	Normal	3.287	GTEX-Q2AG-0011-R8A-SM-2HMK5
GBM(T=153,N=1157)	Normal	4.1368	GTEX-13X6K-0011-R3b-SM-5PNUD
GBM(T=153,N=1157)	Normal	4.2624	GTEX-X585-0011-R1B-SM-46MVE
GBM(T=153,N=1157)	Normal	5.2335	GTEX-13N2G-0011-R5a-SM-5MR33
GBM(T=153,N=1157)	Normal	0.517	GTEX-RVPU-0011-R6A-SM-2XCAC
GBM(T=153,N=1157)	Normal	4.3378	GTEX-13X6I-0011-R11a-SM-5P9HN
GBM(T=153,N=1157)	Normal	3.5923	GTEX-13S7M-3126-SM-5RQJQ
GBM(T=153,N=1157)	Normal	3.9327	GTEX-ZDXO-0011-R3a-SM-4WKFS
GBM(T=153,N=1157)	Normal	3.8177	GTEX-13RTJ-0011-R3a-SM-5PNX7
GBM(T=153,N=1157)	Normal	2.982	GTEX-139UC-0011-R4a-SM-5K7XM
GBM(T=153,N=1157)	Normal	4.8294	GTEX-X261-0011-R8A-SM-4E3I5
GBM(T=153,N=1157)	Normal	4.5886	GTEX-12126-0926-SM-5FQTW
GBM(T=153,N=1157)	Normal	3.5299	GTEX-14ASI-0011-R8b-SM-5S2UB
GBM(T=153,N=1157)	Normal	3.6184	GTEX-14A5I-2826-SM-5SIBF
GBM(T=153,N=1157)	Normal	3.6961	GTEX-12WSA-0011-R2a-SM-57WDK
GBM(T=153,N=1157)	Normal	3.0688	GTEX-NPJ7-0011-R1a-SM-3GACT
GBM(T=153,N=1157)	Normal	4.6106	GTEX-13N2G-0011-R6b-SM-5MR3P
GBM(T=153,N=1157)	Normal	3.0038	GTEX-NPJ7-0011-R4a-SM-2I3GJ
GBM(T=153,N=1157)	Normal	3.9883	GTEX-NL3H-0011-R6a-SM-2I3G8
GBM(T=153,N=1157)	Normal	3.9431	GTEX-ZAB4-0011-R10a-SM-4SOKH
GBM(T=153,N=1157)	Normal	3.867	GTEX-13SLW-0011-R11a-SM-5SI8Q
GBM(T=153,N=1157)	Normal	4.6634	GTEX-11WQK-3026-SM-5EQL6
GBM(T=153,N=1157)	Normal	1.9822	GTEX-131XW-0011-R6b-SM-5K7XY
GBM(T=153,N=1157)	Normal	3.7699	GTEX-N7MT-1126-SM-2YUNQ
GBM(T=153,N=1157)	Normal	3.9965	GTEX-WL46-2926-SM-3LK82
GBM(T=153,N=1157)	Normal	4.1539	GTEX-ZDXO-2926-SM-4WKFM
GBM(T=153,N=1157)	Normal	3.0428	GTEX-1399T-0011-R4b-SM-5DUVX
GBM(T=153,N=1157)	Normal	3.4183	GTEX-12ZZW-0011-R7a-SM-5DUWC
GBM(T=153,N=1157)	Normal	3.7039	GTEX-1445S-0011-R2b-SM-5PNUH
GBM(T=153,N=1157)	Normal	4.497	GTEX-R55E-0011-R11A-SM-2TC6I
GBM(T=153,N=1157)	Normal	3.4596	GTEX-QMR6-1326-SM-32PLB
GBM(T=153,N=1157)	Normal	3.3759	GTEX-147F4-0011-R8b-SM-5S2UN
GBM(T=153,N=1157)	Normal	3.6451	GTEX-139TS-0011-R10a-SM-5K7TU
GBM(T=153,N=1157)	Normal	4.5644	GTEX-12WSB-0011-R7b-SM-5GU6V
GBM(T=153,N=1157)	Normal	4.3442	GTEX-13IVO-0011-R11b-SM-5LZXQ
GBM(T=153,N=1157)	Normal	2.8076	GTEX-1212Z-0011-R1b-SM-5BC72
GBM(T=153,N=1157)	Normal	4.0189	GTEX-Q2AG-0011-R2A-SM-2HMIT
GBM(T=153,N=1157)	Normal	3.9175	GTEX-11H98-0011-R5b-SM-57WCF
GBM(T=153,N=1157)	Normal	2.828	GTEX-ZV68-0011-R7a-SM-51MT4
GBM(T=153,N=1157)	Normal	4.3285	GTEX-12ZZY-0011-R10b-SM-5HL7W
GBM(T=153,N=1157)	Normal	4.3548	GTEX-12WSC-0011-R5b-SM-5CVNS
GBM(T=153,N=1157)	Normal	4.1384	GTEX-11GSO-2926-SM-5HL73
GBM(T=153,N=1157)	Normal	4.2914	GTEX-13O3O-0011-R10a-SM-5LUA9
GBM(T=153,N=1157)	Normal	3.8054	GTEX-12WSF-0011-R1a-SM-5DUVI
GBM(T=153,N=1157)	Normal	3.3938	GTEX-12WSM-0011-R7b-SM-5EGLD
GBM(T=153,N=1157)	Normal	3.6125	GTEX-139UC-3126-SM-5J1OY
GBM(T=153,N=1157)	Normal	3.6054	GTEX-11GSP-0011-R10a-SM-5NQ7J
GBM(T=153,N=1157)	Normal	2.9692	GTEX-ZF28-0011-R8a-SM-4WWFW
GBM(T=153,N=1157)	Normal	2.5536	GTEX-RVPU-0011-R3A-SM-2XCAE
GBM(T=153,N=1157)	Normal	3.8571	GTEX-RNOR-0011-R3A-SM-2TF5J
GBM(T=153,N=1157)	Normal	4.499	GTEX-13OVJ-0011-R2b-SM-5L3GP
GBM(T=153,N=1157)	Normal	2.9167	GTEX-QMR6-0011-R5A-SM-32PKT
GBM(T=153,N=1157)	Normal	3.8944	GTEX-11WQC-0011-R11b-SM-57WD6
GBM(T=153,N=1157)	Normal	4.5589	GTEX-11DXW-1026-SM-5H11K
GBM(T=153,N=1157)	Normal	3.6623	GTEX-ZE9C-0011-R2a-SM-4WKGH
GBM(T=153,N=1157)	Normal	1.5165	GTEX-14753-0011-R8b-SM-5S2U1
GBM(T=153,N=1157)	Normal	3.5851	GTEX-13FHP-3026-SM-5IJBS
GBM(T=153,N=1157)	Normal	4.0046	GTEX-13VXU-0011-R7b-SM-5SI72
GBM(T=153,N=1157)	Normal	1.3454	GTEX-12WSE-0011-R7a-SM-5PNWF
GBM(T=153,N=1157)	Normal	5.0837	GTEX-X585-3026-SM-46MWF
GBM(T=153,N=1157)	Normal	4.281	GTEX-12WSF-0011-R10a-SM-5LZVH
GBM(T=153,N=1157)	Normal	2.6371	GTEX-ZE9C-0011-R4a-SM-4WKH6
GBM(T=153,N=1157)	Normal	3.866	GTEX-14BIN-0011-R11a-SM-5SI79
GBM(T=153,N=1157)	Normal	3.9524	GTEX-12ZZX-2926-SM-5GCOQ
GBM(T=153,N=1157)	Normal	4.3002	GTEX-Y8DK-0011-R11A-SM-4SOK2
GBM(T=153,N=1157)	Normal	4.2803	GTEX-WZTO-2926-SM-3NM9I
GBM(T=153,N=1157)	Normal	4.7143	GTEX-WWYW-0011-R5A-SM-3NB3E
GBM(T=153,N=1157)	Normal	3.3577	GTEX-13QJC-0011-R2b-SM-5PNUN
GBM(T=153,N=1157)	Normal	4.222	GTEX-13SLX-0011-R10a-SM-5P9HV
GBM(T=153,N=1157)	Normal	3.8013	GTEX-RVPV-0011-R11A-SM-2TF6F
GBM(T=153,N=1157)	Normal	4.1612	GTEX-12WSA-0011-R7b-SM-5GU5U
GBM(T=153,N=1157)	Normal	3.4088	GTEX-1269C-3126-SM-5EGI6
GBM(T=153,N=1157)	Normal	4.2304	GTEX-11WQK-0011-R10a-SM-5BC6R
GBM(T=153,N=1157)	Normal	4.235	GTEX-13OVJ-0011-R1b-SM-5L3I6
GBM(T=153,N=1157)	Normal	3.3061	GTEX-139TS-0011-R2b-SM-5J1MX
GBM(T=153,N=1157)	Normal	4.1612	GTEX-11OF3-0011-R6b-SM-57WBG
GBM(T=153,N=1157)	Normal	3.6872	GTEX-13FHO-0011-R3b-SM-5K7YA
GBM(T=153,N=1157)	Normal	4.1547	GTEX-RU72-0011-R5A-SM-2TF6U
GBM(T=153,N=1157)	Normal	3.162	GTEX-13OVL-0011-R1a-SM-5L3H5
GBM(T=153,N=1157)	Normal	4.4317	GTEX-X4XX-0011-R11A-SM-46MWQ
GBM(T=153,N=1157)	Normal	3.8289	GTEX-ZF28-0011-R5a-SM-4WWCZ
GBM(T=153,N=1157)	Normal	3.551	GTEX-NPJ7-0011-R9a-SM-2TC5R
GBM(T=153,N=1157)	Normal	4.2706	GTEX-13OW6-0011-R10a-SM-5L3HE
GBM(T=153,N=1157)	Normal	4.597	GTEX-T6MN-0011-R1A-SM-32QOY
GBM(T=153,N=1157)	Normal	2.0776	GTEX-RVPU-0011-R7A-SM-2XCAB
GBM(T=153,N=1157)	Normal	4.1203	GTEX-11GSP-0011-R7b-SM-57WC3
GBM(T=153,N=1157)	Normal	4.2773	GTEX-12ZZX-0011-R6a-SM-5HL8L
GBM(T=153,N=1157)	Normal	2.7868	GTEX-131XW-0011-R10a-SM-5DUVA
GBM(T=153,N=1157)	Normal	3.637	GTEX-UTHO-0011-R6A-SM-3GIJW
GBM(T=153,N=1157)	Normal	4.2921	GTEX-13VXU-3026-SM-5LU3K
GBM(T=153,N=1157)	Normal	4.2795	GTEX-T2IS-0011-R2A-SM-32QPF
GBM(T=153,N=1157)	Normal	3.9589	TCGA-06-0681-11
GBM(T=153,N=1157)	Normal	4.4061	GTEX-131XH-2926-SM-5LZU4
GBM(T=153,N=1157)	Normal	4.5602	GTEX-139UC-0011-R5b-SM-5K7VY
GBM(T=153,N=1157)	Normal	2.96	GTEX-QDT8-0011-R5A-SM-32PKN
GBM(T=153,N=1157)	Normal	3.6312	GTEX-13G51-0011-R10b-SM-5LZYF
GBM(T=153,N=1157)	Normal	3.7116	GTEX-11DXW-1126-SM-5H12Q
GBM(T=153,N=1157)	Normal	4.1923	GTEX-145LS-0011-R2a-SM-5PNZI
GBM(T=153,N=1157)	Normal	3.8044	GTEX-WL46-0011-R10A-SM-3MJFQ
GBM(T=153,N=1157)	Normal	3.7773	GTEX-12WS9-0011-R6a-SM-5P9EW
GBM(T=153,N=1157)	Normal	3.3076	GTEX-147GR-0011-R7a-SM-5S2RP
GBM(T=153,N=1157)	Normal	3.8581	GTEX-13PL6-3126-SM-5LUAR
GBM(T=153,N=1157)	Normal	4.6089	GTEX-12WSH-0011-R11a-SM-5LZVM
GBM(T=153,N=1157)	Normal	4.0242	GTEX-13SLX-0011-R2b-SM-5S2VP
GBM(T=153,N=1157)	Normal	4.7242	GTEX-WHSE-0011-R4A-SM-3P5ZN
GBM(T=153,N=1157)	Normal	2.5561	GTEX-12ZZW-0011-R3a-SM-5DUWW
GBM(T=153,N=1157)	Normal	4.0497	GTEX-13X6K-0011-R2b-SM-5P9K3
GBM(T=153,N=1157)	Normal	3.5791	GTEX-13X6I-0011-R10a-SM-5PNWI
GBM(T=153,N=1157)	Normal	4.2412	GTEX-14BIM-0011-R11b-SM-5S2RN
GBM(T=153,N=1157)	Normal	3.716	GTEX-R55F-0011-R8A-SM-2TF4F
GBM(T=153,N=1157)	Normal	3.7773	GTEX-11UD1-0011-R2b-SM-5BC6O
GBM(T=153,N=1157)	Normal	4.149	GTEX-147F4-0011-R6b-SM-5S2UP
GBM(T=153,N=1157)	Normal	4.9626	GTEX-X585-0011-R11B-SM-46MUZ
GBM(T=153,N=1157)	Normal	4.1169	GTEX-13SLX-3126-SM-5S2Q5
GBM(T=153,N=1157)	Normal	4.3876	GTEX-11NV4-0011-R6a-SM-57WD5
GBM(T=153,N=1157)	Normal	3.2662	GTEX-13CZV-0011-R7b-SM-5LZXH
GBM(T=153,N=1157)	Normal	3.5803	GTEX-145LU-0011-R10a-SM-5PNWJ
GBM(T=153,N=1157)	Normal	4.2548	GTEX-ZAB4-0011-R2a-SM-4RGNP
GBM(T=153,N=1157)	Normal	3.6347	GTEX-11O72-2926-SM-5BC4V
GBM(T=153,N=1157)	Normal	4.1384	GTEX-12WSH-0011-R10a-SM-5LZUS
GBM(T=153,N=1157)	Normal	3.3745	GTEX-13FXS-0011-R6b-SM-5L3F7
GBM(T=153,N=1157)	Normal	3.7815	GTEX-1313W-0011-R4b-SM-5KLZV
GBM(T=153,N=1157)	Normal	4.1684	GTEX-Y8DK-0011-R6A-SM-4V6EG
GBM(T=153,N=1157)	Normal	4.0189	GTEX-R55E-0011-R7A-SM-2TC5Z
GBM(T=153,N=1157)	Normal	3.7389	GTEX-131YS-0011-R1a-SM-5DUXC
GBM(T=153,N=1157)	Normal	4.0841	GTEX-13OW6-0011-R7b-SM-5L3H4
GBM(T=153,N=1157)	Normal	3.7898	GTEX-ZVT3-3026-SM-5E43N
GBM(T=153,N=1157)	Normal	3.7345	GTEX-13X6J-0011-R10b-SM-5PNWA
GBM(T=153,N=1157)	Normal	4.3569	GTEX-11GSP-3126-SM-5A5LL
GBM(T=153,N=1157)	Normal	2.6043	GTEX-13PL6-0011-R5b-SM-5O9BI
GBM(T=153,N=1157)	Normal	3.0181	GTEX-11WQC-0011-R8b-SM-57WCH
GBM(T=153,N=1157)	Normal	4.0427	GTEX-13OVJ-0011-R4b-SM-5P9H5
GBM(T=153,N=1157)	Normal	4.0331	GTEX-13RTJ-0011-R2a-SM-5PNW9
GBM(T=153,N=1157)	Normal	3.6972	GTEX-13FLW-0011-R7b-SM-5L3EZ
GBM(T=153,N=1157)	Normal	3.7688	GTEX-XMD1-0011-R1A-SM-4AT4C
GBM(T=153,N=1157)	Normal	2.2753	GTEX-S7PM-0011-R6A-SM-3NM8F
GBM(T=153,N=1157)	Normal	2.5437	GTEX-139UW-0011-R11a-SM-5IJGN
GBM(T=153,N=1157)	Normal	4.4523	GTEX-1313W-3026-SM-5LZUZ
GBM(T=153,N=1157)	Normal	4.4257	GTEX-139UC-3226-SM-5N9EZ
GBM(T=153,N=1157)	Normal	3.7226	GTEX-WL46-0011-R9A-SM-3MJFP
GBM(T=153,N=1157)	Normal	2.7422	GTEX-11ZU8-0011-R4a-SM-5BC6Y
GBM(T=153,N=1157)	Normal	3.2796	GTEX-NL3H-0011-R3a-SM-2I3GL
GBM(T=153,N=1157)	Normal	3.74	GTEX-N7MT-0011-R1a-SM-5SI7S
GBM(T=153,N=1157)	Normal	4.3653	GTEX-13N1W-0011-R6a-SM-5MR43
GBM(T=153,N=1157)	Normal	3.7804	GTEX-13FLV-0011-R3b-SM-5LZYP
GBM(T=153,N=1157)	Normal	4.1547	GTEX-T5JC-0011-R6A-SM-5SI89
GBM(T=153,N=1157)	Normal	3.9737	GTEX-NPJ8-0011-R8a-SM-2HMLG
GBM(T=153,N=1157)	Normal	3.7888	GTEX-1445S-0011-R10a-SM-5PNWB
GBM(T=153,N=1157)	Normal	4.5255	GTEX-T2IS-2926-SM-32QPO
GBM(T=153,N=1157)	Normal	2.3164	GTEX-131XW-0011-R11a-SM-5DUV9
GBM(T=153,N=1157)	Normal	4.3841	GTEX-QVJO-1325-SM-2S1QX
GBM(T=153,N=1157)	Normal	3.7909	GTEX-XMD1-0011-R3B-SM-4AT5R
GBM(T=153,N=1157)	Normal	3.7039	GTEX-ZE7O-0011-R10a-SM-57WAZ
GBM(T=153,N=1157)	Normal	3.871	GTEX-13G51-3026-SM-5IJB8
GBM(T=153,N=1157)	Normal	4.0627	GTEX-13FHP-0011-R11b-SM-5LZXP
GBM(T=153,N=1157)	Normal	4.855	GTEX-WWYW-0011-R11A-SM-3NB38
GBM(T=153,N=1157)	Normal	3.7356	GTEX-14ABY-0011-R5b-SM-5SI7B
GBM(T=153,N=1157)	Normal	3.7762	GTEX-ZXG5-0011-R6a-SM-57WBZ
GBM(T=153,N=1157)	Normal	5.1631	GTEX-X4EP-3026-SM-3P5YP
GBM(T=153,N=1157)	Normal	3.87	GTEX-13OW7-0011-R8b-SM-5L3HR
GBM(T=153,N=1157)	Normal	3.6578	GTEX-13RTJ-0011-R8b-SM-5O9DL
GBM(T=153,N=1157)	Normal	2.2693	GTEX-12ZZZ-0011-R4b-SM-5DUV7
GBM(T=153,N=1157)	Normal	3.6382	GTEX-13CZV-0011-R3a-SM-5KM27
GBM(T=153,N=1157)	Normal	4.4693	GTEX-N7MS-0011-R11A-SM-2HMJS
GBM(T=153,N=1157)	Normal	3.944	GTEX-12WSE-0011-R10b-SM-5P9JV
GBM(T=153,N=1157)	Normal	4.1061	GTEX-13SLW-0011-R5b-SM-5SI6Z
GBM(T=153,N=1157)	Normal	2.8522	GTEX-14753-0011-R10b-SM-5S2WE
GBM(T=153,N=1157)	Normal	4.4874	GTEX-13OW5-0011-R1b-SM-5L3GE
GBM(T=153,N=1157)	Normal	3.4034	GTEX-14ABY-0011-R4b-SM-5S2VN
GBM(T=153,N=1157)	Normal	4.1939	GTEX-NL3H-0011-R10A-SM-2I3E9
GBM(T=153,N=1157)	Normal	4.441	GTEX-145LU-2626-SM-5LU9Z
GBM(T=153,N=1157)	Normal	4.7442	GTEX-WHSE-0011-R6A-SM-3P5ZP
GBM(T=153,N=1157)	Normal	4.2691	GTEX-NPJ8-0011-R5a-SM-2HMJY
GBM(T=153,N=1157)	Normal	4.0713	GTEX-13OW6-0011-R8a-SM-5L3GF
GBM(T=153,N=1157)	Normal	3.2766	GTEX-ZDXO-0011-R7a-SM-4WWCU
GBM(T=153,N=1157)	Normal	4.5161	GTEX-NPJ8-0011-R11A-SM-2YUMS
GBM(T=153,N=1157)	Normal	2.7784	GTEX-139TS-0011-R6a-SM-5J2OB
GBM(T=153,N=1157)	Normal	3.2632	GTEX-11NUK-2926-SM-5A5MD
GBM(T=153,N=1157)	Normal	3.8481	GTEX-131XW-0011-R9a-SM-5N9EO
GBM(T=153,N=1157)	Normal	2.4306	GTEX-145LU-0011-R1a-SM-5Q5CE
GBM(T=153,N=1157)	Normal	3.5875	GTEX-145LS-0011-R4b-SM-5S2UT
GBM(T=153,N=1157)	Normal	4.0816	GTEX-ZF28-0011-R10a-SM-4WWEH
GBM(T=153,N=1157)	Normal	1.7097	GTEX-144GO-0011-R1a-SM-5PNWO
GBM(T=153,N=1157)	Normal	3.7094	GTEX-NPJ8-0011-R7a-SM-2HMJV
GBM(T=153,N=1157)	Normal	5.3427	GTEX-X4EP-0011-R10B-SM-4QASJ
GBM(T=153,N=1157)	Normal	4.5167	GTEX-NPJ8-0011-R9a-SM-2YUN5
GBM(T=153,N=1157)	Normal	4.5862	GTEX-145MH-0011-R11a-SM-5P9HQ
GBM(T=153,N=1157)	Normal	4.2025	GTEX-QVUS-0011-R6A-SM-3GACX
GBM(T=153,N=1157)	Normal	3.3535	GTEX-WVLH-0011-R7A-SM-3MJFB
GBM(T=153,N=1157)	Normal	2.0979	GTEX-144GL-0011-R4a-SM-5PNUI
GBM(T=153,N=1157)	Normal	3.4007	GTEX-1445S-0011-R3a-SM-5P9HY
GBM(T=153,N=1157)	Normal	4.309	GTEX-14ABY-0011-R11a-SM-5SI7C
GBM(T=153,N=1157)	Normal	3.0217	GTEX-13OW6-0011-R4a-SM-5O9DX
GBM(T=153,N=1157)	Normal	3.1212	GTEX-ZVT3-0011-R8b-SM-57WDJ
GBM(T=153,N=1157)	Normal	4.3618	GTEX-QVJO-0011-R4A-SM-2S1QL
GBM(T=153,N=1157)	Normal	5.752	GTEX-X4EP-0011-R5A-SM-3P628
GBM(T=153,N=1157)	Normal	3.9412	GTEX-WVLH-0011-R2A-SM-3MJFJ
GBM(T=153,N=1157)	Normal	3.4183	GTEX-13O3O-0011-R4b-SM-5KM3F
GBM(T=153,N=1157)	Normal	4.3924	GTEX-13OVJ-0011-R11a-SM-5P9H8
GBM(T=153,N=1157)	Normal	3.5911	GTEX-X4XX-0011-R7A-SM-46MWR
GBM(T=153,N=1157)	Normal	4.4706	GTEX-12WSB-0011-R5b-SM-5GU67
GBM(T=153,N=1157)	Normal	3.1572	GTEX-11ONC-0011-R9b-SM-5NQ8J
GBM(T=153,N=1157)	Normal	4.3597	GTEX-13JUV-0011-R10b-SM-5LZXR
GBM(T=153,N=1157)	Normal	3.8798	GTEX-13OW6-0011-R1a-SM-5L3HQ
GBM(T=153,N=1157)	Normal	4.4602	GTEX-13OW5-3126-SM-5MR3Y
GBM(T=153,N=1157)	Normal	4.4906	GTEX-12WSE-2926-SM-5RQJ9
GBM(T=153,N=1157)	Normal	-9.9658	GTEX-TSE9-2926-SM-5CHQO
GBM(T=153,N=1157)	Normal	4.3931	GTEX-13S7M-3026-SM-5S2QQ
GBM(T=153,N=1157)	Normal	4.49	GTEX-13JUV-3026-SM-5K7WX
GBM(T=153,N=1157)	Normal	4.3449	GTEX-12ZZX-0011-R11a-SM-5DUVJ
GBM(T=153,N=1157)	Normal	4.858	GTEX-13NYC-2826-SM-5K7WR
GBM(T=153,N=1157)	Normal	4.0841	GTEX-13O3O-0011-R5b-SM-5KM44
GBM(T=153,N=1157)	Normal	3.928	GTEX-145LS-0011-R5a-SM-5SI65
GBM(T=153,N=1157)	Normal	3.6972	GTEX-13JVG-0011-R10b-SM-5KM2P
GBM(T=153,N=1157)	Normal	3.7453	GTEX-131XH-0011-R8a-SM-5EGLL
GBM(T=153,N=1157)	Normal	4.1269	TCGA-06-0675-11
GBM(T=153,N=1157)	Normal	4.322	GTEX-139TT-0011-R5b-SM-5K7W8
GBM(T=153,N=1157)	Normal	3.573	GTEX-1445S-3026-SM-5O9BR
GBM(T=153,N=1157)	Normal	3.8259	GTEX-RU72-3026-SM-5SI7Y
GBM(T=153,N=1157)	Normal	3.6006	GTEX-N7MS-2425-SM-26GMD
GBM(T=153,N=1157)	Normal	0.8488	GTEX-N7MT-1226-SM-26GMT
GBM(T=153,N=1157)	Normal	3.7836	GTEX-N7MT-1226-SM-26GMC
GBM(T=153,N=1157)	Normal	4.4061	GTEX-ZUA1-2926-SM-59HL3
GBM(T=153,N=1157)	Normal	4.435	GTEX-12WSM-2126-SM-5GCOC
GBM(T=153,N=1157)	Normal	2.6962	GTEX-1445S-0011-R4a-SM-5PNWN
GBM(T=153,N=1157)	Normal	4.0619	GTEX-ZE9C-0011-R7a-SM-4WWCX
GBM(T=153,N=1157)	Normal	4.2699	GTEX-1313W-0011-R6a-SM-5K7XO
GBM(T=153,N=1157)	Normal	1.3623	GTEX-13RTL-0011-R9a-SM-5Q5BR
GBM(T=153,N=1157)	Normal	3.8964	GTEX-13X6J-0011-R7b-SM-5PNUC
GBM(T=153,N=1157)	Normal	3.3105	GTEX-145LS-0011-R1b-SM-5PNUP
GBM(T=153,N=1157)	Normal	3.7898	GTEX-13NYB-0011-R5a-SM-5MR45
GBM(T=153,N=1157)	Normal	3.7971	GTEX-QVUS-0011-R10A-SM-3GIK3
GBM(T=153,N=1157)	Normal	3.9089	GTEX-Q2AG-2926-SM-2HMJ3
GBM(T=153,N=1157)	Normal	4.5154	GTEX-13X6I-2926-SM-5Q5C3
GBM(T=153,N=1157)	Normal	3.4791	GTEX-13FTY-0011-R9b-SM-5KM2U
GBM(T=153,N=1157)	Normal	2.2813	GTEX-11ZVC-0011-R3a-SM-5BC6V
GBM(T=153,N=1157)	Normal	4.6416	GTEX-13NYS-3126-SM-5KLYV
GBM(T=153,N=1157)	Normal	3.9204	GTEX-13S7M-0011-R10b-SM-5PNZB
GBM(T=153,N=1157)	Normal	3.0671	GTEX-13CZV-0011-R4b-SM-5J2NY
GBM(T=153,N=1157)	Normal	4.6041	GTEX-131YS-0011-R7a-SM-5IJDA
GBM(T=153,N=1157)	Normal	3.2189	GTEX-1477Z-0011-R10b-SM-5S2RF
GBM(T=153,N=1157)	Normal	4.287	GTEX-13NYS-0011-R4b-SM-5MR3O
GBM(T=153,N=1157)	Normal	4.3765	GTEX-X4XX-2926-SM-3NMB1
GBM(T=153,N=1157)	Normal	4.5243	GTEX-NPJ8-1526-SM-2D7VU
GBM(T=153,N=1157)	Normal	4.2142	GTEX-WVLH-0011-R6A-SM-3MJFZ
GBM(T=153,N=1157)	Normal	3.716	GTEX-14A5I-2926-SM-5Q5CQ
GBM(T=153,N=1157)	Normal	3.1311	GTEX-13PLJ-0011-R11b-SM-5O9BS
GBM(T=153,N=1157)	Normal	4.1899	GTEX-11TTK-2826-SM-5GU5K
GBM(T=153,N=1157)	Normal	3.7846	GTEX-13SLX-0011-R9b-SM-5SI6X
GBM(T=153,N=1157)	Normal	4.437	GTEX-XMD1-2926-SM-4AT42
GBM(T=153,N=1157)	Normal	4.8851	GTEX-X585-0011-R5A-SM-46MVI
GBM(T=153,N=1157)	Normal	3.5411	GTEX-1399T-0011-R8b-SM-5IJD8
GBM(T=153,N=1157)	Normal	2.4518	GTEX-13O1R-0011-R9b-SM-5KM33
GBM(T=153,N=1157)	Normal	2.5163	GTEX-13JVG-0011-R4a-SM-5MR4C
GBM(T=153,N=1157)	Normal	5.1322	GTEX-X4EP-0011-R11B-SM-4QASK
GBM(T=153,N=1157)	Normal	3.0074	GTEX-YJ89-0011-R5a-SM-4V6GM
GBM(T=153,N=1157)	Normal	3.8581	GTEX-14BIM-0011-R4b-SM-5S2RK
GBM(T=153,N=1157)	Normal	3.8581	GTEX-13SLW-0011-R8b-SM-5SI64
GBM(T=153,N=1157)	Normal	3.6566	GTEX-13QIC-0011-R8b-SM-5O9CV
GBM(T=153,N=1157)	Normal	3.9865	GTEX-N7MS-0011-R8a-SM-2YUMK
GBM(T=153,N=1157)	Normal	3.5657	GTEX-13NYB-0011-R10a-SM-5KM43
GBM(T=153,N=1157)	Normal	4.0233	GTEX-14BIN-3326-SM-5Q5E6
GBM(T=153,N=1157)	Normal	4.5342	GTEX-NPJ8-0011-R10A-SM-2YUMO
GBM(T=153,N=1157)	Normal	4.0575	GTEX-1313W-0011-R5b-SM-5L3EP
GBM(T=153,N=1157)	Normal	4.1458	GTEX-QVJO-0011-R10A-SM-2S1QJ
GBM(T=153,N=1157)	Normal	3.906	GTEX-Q2AG-0011-R4A-SM-2HMKA
GBM(T=153,N=1157)	Normal	1.3109	GTEX-RVPU-0011-R4A-SM-2TF6X
GBM(T=153,N=1157)	Normal	4.4156	GTEX-WHSE-0011-R7A-SM-3P5YZ
GBM(T=153,N=1157)	Normal	3.9783	GTEX-P44G-0011-R10A-SM-2I3FF
GBM(T=153,N=1157)	Normal	3.7678	GTEX-YFC4-0011-R1a-SM-4V6EH
GBM(T=153,N=1157)	Normal	4.1136	GTEX-131XH-0011-R10a-SM-5EGLJ
GBM(T=153,N=1157)	Normal	4.2884	GTEX-13N2G-0011-R2a-SM-5MR4Q
GBM(T=153,N=1157)	Normal	4.0515	GTEX-1128S-2726-SM-5H12C
GBM(T=153,N=1157)	Normal	2.7972	GTEX-11ZVC-0011-R4a-SM-5BC6Z
GBM(T=153,N=1157)	Normal	3.794	GTEX-11GSO-0011-R3b-SM-57WB2
GBM(T=153,N=1157)	Normal	4.5398	GTEX-WVLH-2926-SM-3MJG5
GBM(T=153,N=1157)	Normal	2.6232	GTEX-RVPU-0011-R8A-SM-5SI8I
GBM(T=153,N=1157)	Normal	3.7324	GTEX-12ZZX-0011-R3b-SM-5EGLH
GBM(T=153,N=1157)	Normal	4.2358	GTEX-1313W-0011-R2a-SM-5EGLF
GBM(T=153,N=1157)	Normal	3.5349	GTEX-13O3Q-0011-R1b-SM-5KM3L
GBM(T=153,N=1157)	Normal	3.8208	GTEX-XLM4-3026-SM-4AT6L
GBM(T=153,N=1157)	Normal	4.8172	GTEX-12WSI-0011-R11b-SM-5P9EZ
GBM(T=153,N=1157)	Normal	3.4251	GTEX-N7MS-0011-R4a-SM-2HMKW
GBM(T=153,N=1157)	Normal	4.2676	GTEX-131YS-3026-SM-5EGHY
GBM(T=153,N=1157)	Normal	4.6393	GTEX-13JUV-0011-R1a-SM-5LZY4
GBM(T=153,N=1157)	Normal	4.1604	GTEX-1399T-0011-R2b-SM-5DUXM
GBM(T=153,N=1157)	Normal	3.6066	GTEX-XOTO-0011-R7B-SM-4B64R
GBM(T=153,N=1157)	Normal	4.402	GTEX-12WSD-0011-R10b-SM-5GU79
GBM(T=153,N=1157)	Normal	4.5454	GTEX-N7MS-0011-R6a-SM-2HMJ4
GBM(T=153,N=1157)	Normal	3.5498	GTEX-13S7M-0011-R5b-SM-5P9HS
GBM(T=153,N=1157)	Normal	3.506	GTEX-12126-0011-R10b-SM-5BC6T
GBM(T=153,N=1157)	Normal	3.7486	GTEX-QVJO-0011-R1A-SM-2S1QI
GBM(T=153,N=1157)	Normal	3.3421	GTEX-XMD1-0011-R2B-SM-4AT5N
GBM(T=153,N=1157)	Normal	4.2009	GTEX-RU72-0011-R11A-SM-2TF6J
GBM(T=153,N=1157)	Normal	2.9875	GTEX-11UD1-0011-R3a-SM-5BC6S
GBM(T=153,N=1157)	Normal	3.6324	GTEX-XOTO-0011-R1B-SM-4B65C
GBM(T=153,N=1157)	Normal	3.2189	GTEX-13O3O-0011-R1b-SM-5KM2K
GBM(T=153,N=1157)	Normal	1.6374	GTEX-14753-0011-R5a-SM-5S2VW
GBM(T=153,N=1157)	Normal	4.735	GTEX-12WS9-2826-SM-5FQU9
GBM(T=153,N=1157)	Normal	3.8827	GTEX-145LS-0011-R3a-SM-5S2VJ
GBM(T=153,N=1157)	Normal	3.4648	GTEX-R55E-0011-R8A-SM-2TC66
GBM(T=153,N=1157)	Normal	4.6271	GTEX-14BIM-0011-R5b-SM-5S2RM
GBM(T=153,N=1157)	Normal	2.9356	GTEX-ZF28-0011-R7a-SM-4WKF5
GBM(T=153,N=1157)	Normal	2.9338	GTEX-RVPU-0011-R8A-SM-2TF74
GBM(T=153,N=1157)	Normal	4.2103	GTEX-12ZZY-0011-R5a-SM-5EGL9
GBM(T=153,N=1157)	Normal	3.4791	GTEX-RNOR-0011-R9A-SM-2TF52
GBM(T=153,N=1157)	Normal	4.6849	GTEX-NPJ8-1526-SM-26GMH
GBM(T=153,N=1157)	Normal	4.2965	GTEX-13VXU-0011-R6a-SM-5SI71
GBM(T=153,N=1157)	Normal	1.4962	GTEX-NPJ8-1526-SM-26GMY
GBM(T=153,N=1157)	Normal	3.3938	GTEX-12WSF-0011-R3a-SM-5DUW7
GBM(T=153,N=1157)	Normal	3.3206	GTEX-12WSD-0011-R7b-SM-5PNWE
GBM(T=153,N=1157)	Normal	4.1836	GTEX-14BIM-0011-R3b-SM-5S2RL
GBM(T=153,N=1157)	Normal	3.7259	GTEX-13G51-0011-R1a-SM-5LZYR
GBM(T=153,N=1157)	Normal	3.2158	GTEX-13FLW-0011-R1b-SM-5LZX2
GBM(T=153,N=1157)	Normal	4.4536	GTEX-13OW6-0011-R11a-SM-5L3H2
GBM(T=153,N=1157)	Normal	4.5675	GTEX-NPJ8-0011-R6a-SM-2HMKB
GBM(T=153,N=1157)	Normal	2.6962	GTEX-11ZVC-0011-R1b-SM-5BC6M
GBM(T=153,N=1157)	Normal	4.865	GTEX-WWYW-3026-SM-3NB36
GBM(T=153,N=1157)	Normal	3.309	GTEX-QMR6-0011-R8A-SM-32PKJ
GBM(T=153,N=1157)	Normal	4.1628	GTEX-13RTJ-0011-R9a-SM-5Q5AY
GBM(T=153,N=1157)	Normal	4.2877	GTEX-13NYS-0011-R1b-SM-5MR55
GBM(T=153,N=1157)	Normal	2.0979	GTEX-OHPN-0011-R8A-SM-33HBT
GBM(T=153,N=1157)	Normal	4.1804	GTEX-13O3Q-0011-R2b-SM-5KM3K
GBM(T=153,N=1157)	Normal	4.4304	GTEX-13X6K-0011-R6a-SM-5P9K6
GBM(T=153,N=1157)	Normal	2.236	GTEX-Y8DK-0011-R1A-SM-4RGLO
GBM(T=153,N=1157)	Normal	4.468	GTEX-131YS-0011-R11b-SM-5EGLM
GBM(T=153,N=1157)	Normal	4.2235	GTEX-X4XX-3026-SM-3NMB2
GBM(T=153,N=1157)	Normal	4.2654	GTEX-11ONC-3026-SM-5985W
GBM(T=153,N=1157)	Normal	3.8818	GTEX-13NZA-0011-R9b-SM-5MR5I
GBM(T=153,N=1157)	Normal	3.5923	GTEX-ZVZQ-0011-R3a-SM-57WC7
GBM(T=153,N=1157)	Normal	3.4997	GTEX-14BIN-0011-R9a-SM-5SI76
GBM(T=153,N=1157)	Normal	4.585	GTEX-139TT-0011-R7b-SM-5J2MN
GBM(T=153,N=1157)	Normal	4.1236	GTEX-11OF3-0011-R11a-SM-57WCR
GBM(T=153,N=1157)	Normal	3.8954	GTEX-145MF-2726-SM-5O995
GBM(T=153,N=1157)	Normal	4.795	GTEX-13G51-0011-R11b-SM-5J2NE
GBM(T=153,N=1157)	Normal	4.4686	GTEX-13O3Q-0011-R5b-SM-5P9H4
GBM(T=153,N=1157)	Normal	2.1702	GTEX-X4XY-0011-R10B-SM-46MWS
GBM(T=153,N=1157)	Normal	4.096	GTEX-1313W-3126-SM-5LZUI
GBM(T=153,N=1157)	Normal	4.3702	GTEX-13FXS-0011-R11a-SM-5L3DM
GBM(T=153,N=1157)	Normal	4.1994	GTEX-13FHO-0011-R5b-SM-5LZZ3
GBM(T=153,N=1157)	Normal	3.4843	GTEX-1445S-0011-R7b-SM-5PNUG
GBM(T=153,N=1157)	Normal	3.9765	GTEX-RU72-0011-R6A-SM-2TF71
GBM(T=153,N=1157)	Normal	4.2396	GTEX-UTHO-0011-R10A-SM-3GIJQ
GBM(T=153,N=1157)	Normal	3.1971	GTEX-145MH-0011-R8a-SM-5PNUL
GBM(T=153,N=1157)	Normal	3.7215	GTEX-NPJ8-0011-R4a-SM-2HML3
GBM(T=153,N=1157)	Normal	4.1684	GTEX-ZYY3-3126-SM-5SI9L
GBM(T=153,N=1157)	Normal	4.499	GTEX-139TT-0011-R11b-SM-5LZV1
GBM(T=153,N=1157)	Normal	4.0926	GTEX-145LU-0011-R11b-SM-5P9JX
GBM(T=153,N=1157)	Normal	4.3639	GTEX-13OW7-2926-SM-5MR3Z
GBM(T=153,N=1157)	Normal	3.0498	GTEX-12WSA-2926-SM-5EQ4D
GBM(T=153,N=1157)	Normal	3.7367	GTEX-12WSD-0011-R4b-SM-5LZUA
GBM(T=153,N=1157)	Normal	3.1393	GTEX-13S7M-0011-R9a-SM-5O9DW
GBM(T=153,N=1157)	Normal	3.5742	GTEX-14ASI-0011-R6a-SM-5S2UZ
GBM(T=153,N=1157)	Normal	3.9099	GTEX-13OVL-0011-R5b-SM-5L3FU
GBM(T=153,N=1157)	Normal	3.7877	GTEX-1313W-0011-R7b-SM-5DUWL
GBM(T=153,N=1157)	Normal	3.6289	GTEX-144GL-0011-R6a-SM-5P9HW
GBM(T=153,N=1157)	Normal	3.5621	GTEX-R55F-1326-SM-2TF5F
GBM(T=153,N=1157)	Normal	2.5634	GTEX-1477Z-0011-R3b-SM-5PNX9
GBM(T=153,N=1157)	Normal	3.6125	GTEX-13X6I-0011-R8a-SM-5PNZF
GBM(T=153,N=1157)	Normal	4.1285	GTEX-12ZZX-2826-SM-5BC6K
GBM(T=153,N=1157)	Normal	4.0046	TCGA-06-0680-11
GBM(T=153,N=1157)	Normal	3.6148	GTEX-13X6J-0011-R5b-SM-5PNWT
GBM(T=153,N=1157)	Normal	3.1876	GTEX-NPJ8-0011-R1a-SM-5SI8B
GBM(T=153,N=1157)	Normal	3.7171	GTEX-XLM4-0011-R8A-SM-4AT44
GBM(T=153,N=1157)	Normal	4.0242	GTEX-139UW-0011-R9b-SM-5LZYT
GBM(T=153,N=1157)	Normal	3.9974	GTEX-13RTJ-0011-R1a-SM-5O9D9
GBM(T=153,N=1157)	Normal	4.4816	GTEX-ZUA1-0011-R5b-SM-51MTG
GBM(T=153,N=1157)	Normal	3.3535	GTEX-11ZUS-2926-SM-5FQSL
GBM(T=153,N=1157)	Normal	4.2134	GTEX-117XS-3026-SM-5N9CA
GBM(T=153,N=1157)	Normal	4.7762	GTEX-13NYS-0011-R5a-SM-5MR4D
GBM(T=153,N=1157)	Normal	4.2803	GTEX-13OVJ-2726-SM-5IJG6
GBM(T=153,N=1157)	Normal	3.4894	GTEX-Z93S-0011-R5b-SM-4RGNI
GBM(T=153,N=1157)	Normal	4.1019	GTEX-QDT8-3026-SM-32PKB
GBM(T=153,N=1157)	Normal	4.4297	GTEX-NPJ8-0011-R3a-SM-2HMIW
GBM(T=153,N=1157)	Normal	2.8897	GTEX-13OVH-0011-R4a-SM-5KM3W
GBM(T=153,N=1157)	Normal	4.3406	GTEX-11ONC-2926-SM-5P9JM
GBM(T=153,N=1157)	Normal	4.8978	GTEX-WWYW-0011-R7A-SM-3NB3H
GBM(T=153,N=1157)	Normal	4.3779	GTEX-RNOR-2226-SM-2TF5O
GBM(T=153,N=1157)	Normal	4.0207	GTEX-WHSE-0011-R3A-SM-3P5ZM
GBM(T=153,N=1157)	Normal	4.3184	GTEX-131XH-0011-R6a-SM-5KM2G
GBM(T=153,N=1157)	Normal	4.3632	GTEX-12WS9-0011-R10a-SM-57WBV
GBM(T=153,N=1157)	Normal	4.0162	GTEX-131YS-0011-R10b-SM-5EQ5N
GBM(T=153,N=1157)	Normal	3.7539	GTEX-13VXU-0011-R3b-SM-5O9CU
GBM(T=153,N=1157)	Normal	3.2466	GTEX-OXRO-0011-R9A-SM-5S2W3
GBM(T=153,N=1157)	Normal	3.8621	GTEX-13X6J-0011-R3b-SM-5P9K5
GBM(T=153,N=1157)	Normal	3.5559	GTEX-11ONC-0011-R8b-SM-5NQ87
GBM(T=153,N=1157)	Normal	4.3807	GTEX-12126-0011-R11a-SM-5BC6X
GBM(T=153,N=1157)	Normal	3.4778	GTEX-RU72-0011-R7A-SM-2TF5U
GBM(T=153,N=1157)	Normal	4.2833	GTEX-11H98-0011-R11b-SM-5NQ6U
GBM(T=153,N=1157)	Normal	4.5491	GTEX-WZTO-0011-R11A-SM-4E3K9
GBM(T=153,N=1157)	Normal	4.373	GTEX-14BIM-3126-SM-5Q5C7
GBM(T=153,N=1157)	Normal	3.8411	GTEX-ZAB4-0011-R3a-SM-4RGNQ
GBM(T=153,N=1157)	Normal	2.8562	GTEX-13OVL-0011-R8a-SM-5L3HH
GBM(T=153,N=1157)	Normal	3.9384	GTEX-14ABY-0011-R9a-SM-5PNZK
GBM(T=153,N=1157)	Normal	4.0713	GTEX-NL4W-0011-R8a-SM-2I3G4
GBM(T=153,N=1157)	Normal	3.1844	GTEX-11GSO-0011-R2a-SM-57WDF
GBM(T=153,N=1157)	Normal	3.1813	GTEX-NL3H-0011-R1a-SM-48TDJ
GBM(T=153,N=1157)	Normal	3.9012	GTEX-X261-0011-R10B-SM-4E3JT
GBM(T=153,N=1157)	Normal	2.7615	GTEX-11ZTS-0011-R3a-SM-5BC78
GBM(T=153,N=1157)	Normal	4.497	GTEX-XLM4-0011-R6A-SM-4AT4B
GBM(T=153,N=1157)	Normal	3.2988	GTEX-12WSB-0011-R11b-SM-57WBJ
GBM(T=153,N=1157)	Normal	4.4977	GTEX-N7MT-0011-R6a-SM-2I3G3
GBM(T=153,N=1157)	Normal	4.7709	GTEX-T5JC-2326-SM-32PMR
GBM(T=153,N=1157)	Normal	4.3862	GTEX-145MH-0011-R5a-SM-5P9JT
GBM(T=153,N=1157)	Normal	3.8401	GTEX-13NZ8-3026-SM-5L3D4
GBM(T=153,N=1157)	Normal	3.992	GTEX-13OVH-3026-SM-5MR4N
GBM(T=153,N=1157)	Normal	4.4006	GTEX-YJ89-0011-R11a-SM-4SOKA
GBM(T=153,N=1157)	Normal	4.1684	GTEX-13N1W-0011-R10b-SM-5MR4H
GBM(T=153,N=1157)	Normal	3.837	GTEX-145MI-3126-SM-5Q5CF
GBM(T=153,N=1157)	Normal	3.9299	GTEX-13OW8-0011-R10a-SM-5L3H6
GBM(T=153,N=1157)	Normal	2.5263	GTEX-13OW8-0011-R8a-SM-5L3G5
GBM(T=153,N=1157)	Normal	4.0233	GTEX-QVUS-0011-R8A-SM-3GAD7
GBM(T=153,N=1157)	Normal	3.3938	GTEX-P44H-0011-R4A-SM-2XCEW
GBM(T=153,N=1157)	Normal	3.4088	GTEX-RU72-0011-R2A-SM-2TF6O
GBM(T=153,N=1157)	Normal	4.5009	GTEX-X585-0011-R8A-SM-46MUX
GBM(T=153,N=1157)	Normal	4.0765	GTEX-145MH-0011-R3b-SM-5P9JQ
GBM(T=153,N=1157)	Normal	3.871	GTEX-11ZUS-0011-R8a-SM-5BC73
GBM(T=153,N=1157)	Normal	4.5844	GTEX-NPJ8-2626-SM-2D7W2
GBM(T=153,N=1157)	Normal	3.5547	GTEX-YFC4-0011-R4a-SM-4RGLQ
GBM(T=153,N=1157)	Normal	3.1507	GTEX-13NZA-0011-R8b-SM-5KM2Q
GBM(T=153,N=1157)	Normal	3.9031	GTEX-Y8DK-0011-R5B-SM-4RTW6
GBM(T=153,N=1157)	Normal	3.3492	GTEX-11ZTS-0011-R1a-SM-5BC71
GBM(T=153,N=1157)	Normal	3.8471	GTEX-YJ89-0011-R9a-SM-4SOK7
GBM(T=153,N=1157)	Normal	2.6602	GTEX-139TU-0011-R5b-SM-5L3E1
GBM(T=153,N=1157)	Normal	4.6905	GTEX-NL3H-0011-R11A-SM-2I3E6
GBM(T=153,N=1157)	Normal	4.0242	GTEX-N7MS-0011-R2a-SM-2HML6
GBM(T=153,N=1157)	Normal	1.9111	GTEX-13FTY-0011-R1a-SM-5LZXE
GBM(T=153,N=1157)	Normal	3.4007	GTEX-12WSF-0011-R4b-SM-5HL88
GBM(T=153,N=1157)	Normal	3.453	GTEX-11ZTS-0011-R2b-SM-5BC75
GBM(T=153,N=1157)	Normal	4.7866	GTEX-T5JC-0011-R11A-SM-32PMB
GBM(T=153,N=1157)	Normal	3.927	GTEX-1399T-3026-SM-5KLZC
GBM(T=153,N=1157)	Normal	3.2174	GTEX-12WS9-0011-R2a-SM-5CVNE
GBM(T=153,N=1157)	Normal	2.2082	GTEX-139T8-0011-R1a-SM-5HL75
GBM(T=153,N=1157)	Normal	3.4804	GTEX-X4XX-0011-R4B-SM-46MWL
GBM(T=153,N=1157)	Normal	1.5216	GTEX-NPJ8-2626-SM-26GMZ
GBM(T=153,N=1157)	Normal	4.2556	GTEX-T5JC-2426-SM-3NMDB
GBM(T=153,N=1157)	Normal	4.2995	GTEX-11ZUS-0011-R11b-SM-5BC7B
GBM(T=153,N=1157)	Normal	4.352	GTEX-13RTJ-3126-SM-5S2Q4
GBM(T=153,N=1157)	Normal	3.483	GTEX-13CZV-0011-R9a-SM-5LZXT
GBM(T=153,N=1157)	Normal	4.0278	GTEX-13CZV-0011-R5a-SM-5K7XA
GBM(T=153,N=1157)	Normal	3.865	GTEX-13OW6-0011-R5a-SM-5O9BK
GBM(T=153,N=1157)	Normal	3.2328	GTEX-12WSM-0011-R6b-SM-5EQ6N
GBM(T=153,N=1157)	Normal	4.3883	GTEX-13N1W-0011-R5b-SM-5MR5Q
GBM(T=153,N=1157)	Normal	3.7302	GTEX-ZZPT-3026-SM-5GZXH
GBM(T=153,N=1157)	Normal	4.3119	GTEX-12ZZY-0011-R6b-SM-5EGLA
GBM(T=153,N=1157)	Normal	3.5911	GTEX-145MI-0011-R4b-SM-5PNZH
GBM(T=153,N=1157)	Normal	3.5387	GTEX-13QIC-0011-R11b-SM-5O9BU
GBM(T=153,N=1157)	Normal	3.4264	GTEX-WVLH-0011-R1A-SM-4MVOK
GBM(T=153,N=1157)	Normal	4.1716	GTEX-13OVJ-0011-R5a-SM-5P9H7
GBM(T=153,N=1157)	Normal	3.6266	GTEX-11GSP-3226-SM-5986O
GBM(T=153,N=1157)	Normal	4.4615	GTEX-13NYS-0011-R8a-SM-5MR5H
GBM(T=153,N=1157)	Normal	4.2736	GTEX-13OW6-3026-SM-5J2MI
GBM(T=153,N=1157)	Normal	2.9618	GTEX-ZE7O-0011-R7a-SM-57WCU
GBM(T=153,N=1157)	Normal	3.6566	GTEX-ZUA1-0011-R3a-SM-4YCEE
GBM(T=153,N=1157)	Normal	4.2404	GTEX-XMD1-0011-R6A-SM-4AT5K
GBM(T=153,N=1157)	Normal	4.479	GTEX-13X6K-0011-R10a-SM-5P9JR
GBM(T=153,N=1157)	Normal	2.8838	GTEX-ZF28-0011-R1a-SM-4WWD1
GBM(T=153,N=1157)	Normal	3.4464	GTEX-ZF28-0011-R6a-SM-4WKHI
GBM(T=153,N=1157)	Normal	3.9617	GTEX-131XH-0011-R2b-SM-5DUVY
GBM(T=153,N=1157)	Normal	4.1931	GTEX-13RTJ-0011-R11a-SM-5O9CK
GBM(T=153,N=1157)	Normal	4.0313	GTEX-13OW5-0011-R4b-SM-5L3HS
GBM(T=153,N=1157)	Normal	3.4635	GTEX-RVPV-0011-R5A-SM-2TF69
GBM(T=153,N=1157)	Normal	3.644	GTEX-12WSF-0011-R7b-SM-5HL99
GBM(T=153,N=1157)	Normal	3.9645	GTEX-WZTO-0011-R1B-SM-3NMAR
GBM(T=153,N=1157)	Normal	4.1128	GTEX-WL46-0011-R1A-SM-3LK6M
GBM(T=153,N=1157)	Normal	4.641	GTEX-UTHO-2926-SM-3P5Z9
GBM(T=153,N=1157)	Normal	3.9041	GTEX-12WSE-0011-R1b-SM-5GU4V
GBM(T=153,N=1157)	Normal	4.1539	GTEX-ZE9C-0011-R6a-SM-4WWCW
GBM(T=153,N=1157)	Normal	4.0162	GTEX-144GL-0011-R1a-SM-5PNZ5
GBM(T=153,N=1157)	Normal	3.8085	GTEX-13O3Q-0011-R8b-SM-5KM2J
GBM(T=153,N=1157)	Normal	3.5742	GTEX-PWO3-0011-R2A-SM-2S1OX
GBM(T=153,N=1157)	Normal	4.6	GTEX-12ZZY-2926-SM-5DUXO
GBM(T=153,N=1157)	Normal	3.9534	GTEX-11OF3-3126-SM-5GU5E
GBM(T=153,N=1157)	Normal	4.3249	GTEX-Z93S-0011-R6b-SM-4RGNJ
GBM(T=153,N=1157)	Normal	4.518	GTEX-139UC-0011-R11a-SM-5KM3J
GBM(T=153,N=1157)	Normal	3.7039	GTEX-13G51-0011-R2b-SM-5LZXS
GBM(T=153,N=1157)	Normal	3.3563	GTEX-YJ89-0011-R6a-SM-4V6GN
GBM(T=153,N=1157)	Normal	4.1103	GTEX-ZDXO-0011-R11a-SM-4WWD9
GBM(T=153,N=1157)	Normal	4.2654	GTEX-14BIL-0011-R9a-SM-5SI7A
GBM(T=153,N=1157)	Normal	4.2442	GTEX-Z93S-0011-R2a-SM-4RGNG
GBM(T=153,N=1157)	Normal	3.8481	GTEX-12ZZZ-0011-R5a-SM-5EQ4M
GBM(T=153,N=1157)	Normal	3.3619	GTEX-13OW8-0011-R7a-SM-5L3FP
GBM(T=153,N=1157)	Normal	2.9655	GTEX-13FHP-0011-R6b-SM-5LZY6
GBM(T=153,N=1157)	Normal	4.149	GTEX-13S7M-0011-R11b-SM-5P9HU
GBM(T=153,N=1157)	Normal	3.8481	GTEX-TSE9-3026-SM-3DB76
GBM(T=153,N=1157)	Normal	3.865	GTEX-12WSC-3026-SM-5GCNF
GBM(T=153,N=1157)	Normal	3.9002	GTEX-QVUS-0011-R4A-SM-3GAE7
GBM(T=153,N=1157)	Normal	2.8199	GTEX-11UD1-0011-R5b-SM-5P9FP
GBM(T=153,N=1157)	Normal	4.1812	GTEX-13FLW-1426-SM-5K7YE
GBM(T=153,N=1157)	Normal	3.8401	GTEX-13JVG-0011-R7b-SM-5MR3Q
GBM(T=153,N=1157)	Normal	4.245	GTEX-145MH-0011-R7a-SM-5PNWH
GBM(T=153,N=1157)	Normal	2.233	GTEX-139TS-0011-R7a-SM-5K7X7
GBM(T=153,N=1157)	Normal	2.2633	GTEX-ZVZQ-0011-R1a-SM-57WBU
GBM(T=153,N=1157)	Normal	3.8208	GTEX-QMR6-0011-R10A-SM-32PKO
GBM(T=153,N=1157)	Normal	4.4771	GTEX-WL46-0011-R11A-SM-3MJFT
GBM(T=153,N=1157)	Normal	3.1765	GTEX-12WSD-0011-R6b-SM-5P9JU
GBM(T=153,N=1157)	Normal	3.7171	GTEX-13X6J-0011-R4b-SM-5P9K4
GBM(T=153,N=1157)	Normal	4.3299	GTEX-11GSP-0011-R11b-SM-5NQ7V
GBM(T=153,N=1157)	Normal	5.6519	GTEX-X4EP-0011-R4B-SM-3P627
GBM(T=153,N=1157)	Normal	4.2706	GTEX-WVLH-0011-R10A-SM-3MJFM
GBM(T=153,N=1157)	Normal	4.1732	GTEX-Q2AG-0011-R1A-SM-2HMJI
GBM(T=153,N=1157)	Normal	4.3148	GTEX-X261-3126-SM-4PQZC
GBM(T=153,N=1157)	Normal	3.6324	GTEX-Z93S-2926-SM-57WB9
GBM(T=153,N=1157)	Normal	4.2862	GTEX-13OVJ-0011-R6b-SM-5L3GH
GBM(T=153,N=1157)	Normal	3.1095	GTEX-13IVO-0011-R10a-SM-5LZY3
GBM(T=153,N=1157)	Normal	4.5436	GTEX-11DZ1-2926-SM-5A5KI
GBM(T=153,N=1157)	Normal	4.0233	GTEX-13X6I-0011-R7b-SM-5PNWP
GBM(T=153,N=1157)	Normal	2.5731	GTEX-RVPU-0011-R9A-SM-3NM8E
GBM(T=153,N=1157)	Normal	2.4623	GTEX-13NZA-0011-R1b-SM-5LUAF
GBM(T=153,N=1157)	Normal	2.3135	GTEX-13NZA-0011-R5b-SM-5KM4K
GBM(T=153,N=1157)	Normal	4.5236	GTEX-13OVH-2926-SM-5IJFH
GBM(T=153,N=1157)	Normal	3.9561	GTEX-P44H-0011-R1A-SM-3NM8J
GBM(T=153,N=1157)	Normal	3.9874	GTEX-13CIG-0011-R5b-SM-5L3F2
GBM(T=153,N=1157)	Normal	4.7132	GTEX-13OW5-0011-R11b-SM-5L3GG
GBM(T=153,N=1157)	Normal	3.4344	GTEX-13JVG-0011-R6a-SM-5MR3E
GBM(T=153,N=1157)	Normal	2.7572	GTEX-11ZU8-0011-R3a-SM-5BC6U
GBM(T=153,N=1157)	Normal	4.235	GTEX-132Q8-0011-R2b-SM-5EQ5Z
GBM(T=153,N=1157)	Normal	4.6456	GTEX-YFC4-3026-SM-5IFJK
GBM(T=153,N=1157)	Normal	4.2943	GTEX-145MH-2926-SM-5Q5D2
GBM(T=153,N=1157)	Normal	4.0816	GTEX-13JUV-0011-R6b-SM-5LZYG
GBM(T=153,N=1157)	Normal	4.5644	GTEX-T6MN-0011-R5A-SM-32QPD
GBM(T=153,N=1157)	Normal	4.3126	GTEX-139TT-0011-R3b-SM-5K7VL
GBM(T=153,N=1157)	Normal	4.2571	GTEX-13CF2-0011-R11b-SM-5LZXO
GBM(T=153,N=1157)	Normal	3.8054	GTEX-144GL-3026-SM-5Q5CW
GBM(T=153,N=1157)	Normal	3.8954	GTEX-QDT8-2926-SM-32PKC
GBM(T=153,N=1157)	Normal	4.0994	GTEX-11NV4-0011-R7a-SM-57WDH
GBM(T=153,N=1157)	Normal	3.2766	GTEX-14ASI-0011-R1b-SM-5S2TY
GBM(T=153,N=1157)	Normal	4.2862	GTEX-ZAB4-0011-R11a-SM-4SOKI
GBM(T=153,N=1157)	Normal	4.366	GTEX-WZTO-2826-SM-3NM8P
GBM(T=153,N=1157)	Normal	3.3938	GTEX-XLM4-0011-R2B-SM-4AT5Z
GBM(T=153,N=1157)	Normal	3.5535	GTEX-QDT8-0011-R9A-SM-32PKH
GBM(T=153,N=1157)	Normal	4.652	GTEX-ZYFD-2926-SM-5GID9
GBM(T=153,N=1157)	Normal	4.3133	GTEX-X585-0011-R4B-SM-46MVH
GBM(T=153,N=1157)	Normal	3.6266	GTEX-QMR6-0011-R6A-SM-32PKP
GBM(T=153,N=1157)	Normal	2.9432	GTEX-13112-0011-R1b-SM-5HL7K
GBM(T=153,N=1157)	Normal	3.6428	GTEX-Z93S-0011-R3b-SM-4RGNH
GBM(T=153,N=1157)	Normal	4.1804	GTEX-T5JC-0011-R10A-SM-32PM2
GBM(T=153,N=1157)	Normal	4.6759	GTEX-X585-0011-R2B-SM-46MVF
GBM(T=153,N=1157)	Normal	4.3082	GTEX-WL46-0011-R3A-SM-3TW8E
GBM(T=153,N=1157)	Normal	3.4477	GTEX-13X6I-0011-R1b-SM-5PNZC
GBM(T=153,N=1157)	Normal	4.4739	GTEX-R55E-0011-R5A-SM-2TC5N
GBM(T=153,N=1157)	Normal	4.1169	GTEX-WVLH-3026-SM-3MJG9
GBM(T=153,N=1157)	Normal	4.1441	GTEX-13OW5-0011-R5b-SM-5L3FR
GBM(T=153,N=1157)	Normal	3.7898	GTEX-Y8DK-0826-SM-4TT3T
GBM(T=153,N=1157)	Normal	4.0688	GTEX-ZUA1-0011-R11b-SM-51MTI
GBM(T=153,N=1157)	Normal	1.9638	GTEX-13CF2-0011-R1a-SM-5LZY1
GBM(T=153,N=1157)	Normal	4.6165	GTEX-12WSH-3126-SM-5LZW8
GBM(T=153,N=1157)	Normal	3.4971	GTEX-12696-3026-SM-5FQTU
GBM(T=153,N=1157)	Normal	4.0816	GTEX-WL46-0011-R6A-SM-3LK6X
GBM(T=153,N=1157)	Normal	4.4377	GTEX-139UC-0011-R9a-SM-5K7W7
GBM(T=153,N=1157)	Normal	3.9856	GTEX-N7MS-0011-R10A-SM-2HMJK
GBM(T=153,N=1157)	Normal	4.5117	GTEX-13SLX-0011-R11b-SM-5O9C8
GBM(T=153,N=1157)	Normal	3.6172	GTEX-147GR-0011-R2b-SM-5S2RQ
GBM(T=153,N=1157)	Normal	4.2412	GTEX-145MG-3026-SM-5RQJA
GBM(T=153,N=1157)	Normal	4.0064	GTEX-13O3O-0011-R11b-SM-5KM4G
GBM(T=153,N=1157)	Normal	3.6916	GTEX-YFC4-0011-R5a-SM-4RGLR
GBM(T=153,N=1157)	Normal	3.0074	GTEX-13PVQ-0011-R9b-SM-5LU3B
GBM(T=153,N=1157)	Normal	2.2663	GTEX-12WSD-0011-R2a-SM-5LZWB
GBM(T=153,N=1157)	Normal	2.4857	GTEX-12WSB-0011-R1b-SM-5P9EY
GBM(T=153,N=1157)	Normal	2.7742	GTEX-12ZZW-0011-R4a-SM-5DUX9
GBM(T=153,N=1157)	Normal	3.5669	GTEX-ZE7O-0011-R5a-SM-57WBO
GBM(T=153,N=1157)	Normal	4.1867	GTEX-WZTO-0011-R3B-SM-3NMC6
GBM(T=153,N=1157)	Normal	3.3938	GTEX-13VXU-0011-R4b-SM-5O9CI
GBM(T=153,N=1157)	Normal	4.6548	GTEX-11EQ8-2826-SM-5N9C1
GBM(T=153,N=1157)	Normal	3.9847	GTEX-QVUS-2926-SM-3GIJB
GBM(T=153,N=1157)	Normal	3.6894	GTEX-P44H-0011-R3A-SM-2XCEQ
GBM(T=153,N=1157)	Normal	4.2204	GTEX-WVLH-0011-R4A-SM-3MJFS
GBM(T=153,N=1157)	Normal	3.8973	GTEX-XOTO-3026-SM-4B65M
GBM(T=153,N=1157)	Normal	3.3003	GTEX-13SLW-0011-R3b-SM-5SI6Y
GBM(T=153,N=1157)	Normal	3.865	GTEX-13JVG-0011-R5a-SM-5MR4O
GBM(T=153,N=1157)	Normal	3.8411	GTEX-111FC-3126-SM-5GZZ2
GBM(T=153,N=1157)	Normal	4.1002	GTEX-1117F-3226-SM-5N9CT
GBM(T=153,N=1157)	Normal	2.9765	GTEX-13JUV-0011-R7b-SM-5LZZG
GBM(T=153,N=1157)	Normal	2.5163	GTEX-145MI-0011-R5a-SM-5Q5B4
GBM(T=153,N=1157)	Normal	4.7437	GTEX-13JVG-3226-SM-5IJGJ
GBM(T=153,N=1157)	Normal	4.309	GTEX-WHSE-0011-R11A-SM-3P5YY
GBM(T=153,N=1157)	Normal	3.4398	GTEX-13JVG-0011-R8a-SM-5KM3E
GBM(T=153,N=1157)	Normal	3.9626	GTEX-QDT8-0011-R9A-SM-5SI8J
GBM(T=153,N=1157)	Normal	4.366	GTEX-13OW5-0011-R6b-SM-5O9BW
GBM(T=153,N=1157)	Normal	3.2541	GTEX-OXRO-0011-R9A-SM-3NB1X
GBM(T=153,N=1157)	Normal	3.7571	GTEX-RNOR-2326-SM-2TF4I
GBM(T=153,N=1157)	Normal	4.5479	GTEX-WL46-2826-SM-3LK81
GBM(T=153,N=1157)	Normal	1.5366	GTEX-YJ89-0011-R1a-SM-4RGLS
GBM(T=153,N=1157)	Normal	4.0295	GTEX-13NYB-0011-R6b-SM-5MR51
GBM(T=153,N=1157)	Normal	3.1294	GTEX-11WQK-0011-R8a-SM-5BC7C
GBM(T=153,N=1157)	Normal	4.1899	GTEX-WL46-0011-R2A-SM-3LK6O
GBM(T=153,N=1157)	Normal	3.5073	GTEX-RU72-0011-R8A-SM-2TF61
GBM(T=153,N=1157)	Normal	4.3807	GTEX-13N2G-0011-R11a-SM-5MR3F
GBM(T=153,N=1157)	Normal	3.603	GTEX-ZVZQ-0011-R6b-SM-57WAY
GBM(T=153,N=1157)	Normal	2.6828	GTEX-ZVT3-0011-R5a-SM-51MSI
GBM(T=153,N=1157)	Normal	4.3793	GTEX-12ZZZ-3126-SM-5LZU6
GBM(T=153,N=1157)	Normal	1.1833	GTEX-RVPU-0011-R4A-SM-5SI8K
GBM(T=153,N=1157)	Normal	3.2112	GTEX-13NZA-0011-R10b-SM-5KM54
GBM(T=153,N=1157)	Normal	4.1915	GTEX-XMD1-0011-R5A-SM-4AT47
GBM(T=153,N=1157)	Normal	3.9156	GTEX-14ABY-0011-R6a-SM-5PNWR
GBM(T=153,N=1157)	Normal	4.4771	GTEX-WWYW-0011-R10A-SM-3NB35
GBM(T=153,N=1157)	Normal	4.538	GTEX-T6MN-0011-R2A-SM-32QOW
GBM(T=153,N=1157)	Normal	4.4887	GTEX-NL4W-0011-R11A-SM-2I3DW
GBM(T=153,N=1157)	Normal	3.7083	GTEX-1313W-0011-R3a-SM-5EGLI
GBM(T=153,N=1157)	Normal	4.1002	GTEX-13VXU-0011-R5a-SM-5O9D7
GBM(T=153,N=1157)	Normal	3.2297	GTEX-12WSD-0011-R1b-SM-5LZVY
GBM(T=153,N=1157)	Normal	4.1269	GTEX-P44H-0011-R3A-SM-5SI8A
GBM(T=153,N=1157)	Normal	3.6393	GTEX-TSE9-0011-R10A-SM-3DB7O
GBM(T=153,N=1157)	Normal	3.3549	GTEX-1445S-0011-R6b-SM-5PNUF
GBM(T=153,N=1157)	Normal	3.4061	GTEX-ZV68-0011-R2a-SM-4YCDK
GBM(T=153,N=1157)	Normal	2.7889	GTEX-XLM4-0011-R9A-SM-4AT45
GBM(T=153,N=1157)	Normal	4.6089	GTEX-13JUV-0011-R11a-SM-5LZYH
GBM(T=153,N=1157)	Normal	2.2113	GTEX-S7PM-0011-R5A-SM-3NM8G
GBM(T=153,N=1157)	Normal	3.7982	GTEX-13FXS-0011-R1a-SM-5K7U6
GBM(T=153,N=1157)	Normal	4.528	GTEX-144GL-0011-R11b-SM-5P9F6
GBM(T=153,N=1157)	Normal	4.3583	GTEX-X4XX-0011-R5A-SM-46MWN
GBM(T=153,N=1157)	Normal	3.4856	GTEX-145LU-0011-R9b-SM-5SI66
GBM(T=153,N=1157)	Normal	4.0401	GTEX-13OW6-0011-R2a-SM-5L3HG
GBM(T=153,N=1157)	Normal	4.3349	GTEX-14DAQ-3026-SM-5S2QZ
GBM(T=153,N=1157)	Normal	3.4726	GTEX-13FHO-0011-R1b-SM-5KLZG
GBM(T=153,N=1157)	Normal	4.0401	GTEX-13N1W-0011-R4a-SM-5MR52
GBM(T=153,N=1157)	Normal	5.4186	GTEX-X4EP-0011-R1A-SM-3P624
GBM(T=153,N=1157)	Normal	2.8641	GTEX-12WS9-0011-R4b-SM-5P9EU
GBM(T=153,N=1157)	Normal	4.3385	GTEX-13RTJ-0011-R10b-SM-5O9CW
GBM(T=153,N=1157)	Normal	3.483	GTEX-13S7M-0011-R6b-SM-5O9D8
GBM(T=153,N=1157)	Normal	4.2973	GTEX-13O3O-0011-R6b-SM-5P9GY
GBM(T=153,N=1157)	Normal	3.9412	GTEX-12WSH-0011-R9b-SM-5LZUG
GBM(T=153,N=1157)	Normal	4.0375	GTEX-12126-1026-SM-5P9JJ
GBM(T=153,N=1157)	Normal	4.3031	GTEX-WWYW-3126-SM-3NB39
GBM(T=153,N=1157)	Normal	2.6325	GTEX-13CF2-0011-R5a-SM-5LZWS
GBM(T=153,N=1157)	Normal	4.2189	GTEX-13VXU-2926-SM-5LU5C
GBM(T=153,N=1157)	Normal	3.6136	GTEX-ZAB4-0011-R8b-SM-4SOKF
GBM(T=153,N=1157)	Normal	3.9901	GTEX-13NYB-3026-SM-5IJD7
GBM(T=153,N=1157)	Normal	4.4095	GTEX-13CIG-0011-R8b-SM-5LZX5
GBM(T=153,N=1157)	Normal	3.9041	GTEX-UTHO-0011-R5A-SM-3GIJD
GBM(T=153,N=1157)	Normal	2.8602	GTEX-13O3O-0011-R8b-SM-5LUAL
GBM(T=153,N=1157)	Normal	4.1883	GTEX-X4XX-0011-R3B-SM-46MWK
GBM(T=153,N=1157)	Normal	4.0943	GTEX-NPJ7-0011-R2a-SM-2I3GF
GBM(T=153,N=1157)	Normal	3.4517	GTEX-ZE9C-0011-R3a-SM-4WKGT
GBM(T=153,N=1157)	Normal	2.5036	GTEX-13QJC-0011-R8b-SM-5S2U6
GBM(T=153,N=1157)	Normal	3.3717	GTEX-12WS9-0011-R3a-SM-5CVNF
GBM(T=153,N=1157)	Normal	3.5766	GTEX-ZUA1-0011-R6b-SM-4YCDD
GBM(T=153,N=1157)	Normal	3.5411	GTEX-13PVQ-0011-R7a-SM-5L3G3
GBM(T=153,N=1157)	Normal	4.232	GTEX-13NYS-0011-R3b-SM-5MR41
GBM(T=153,N=1157)	Normal	4.235	GTEX-13X6K-0011-R7b-SM-5P9K7
GBM(T=153,N=1157)	Normal	4.2404	GTEX-1399T-0011-R5b-SM-5IJDK
GBM(T=153,N=1157)	Normal	3.7688	GTEX-145MH-3026-SM-5Q5DZ
GBM(T=153,N=1157)	Normal	4.0028	GTEX-Y8DK-0011-R10A-SM-4SOK1
GBM(T=153,N=1157)	Normal	3.1079	GTEX-13OW8-0011-R1a-SM-5L3HI
GBM(T=153,N=1157)	Normal	2.6208	GTEX-14753-0011-R6b-SM-5S2UD
GBM(T=153,N=1157)	Normal	4.7735	GTEX-13X6K-0011-R5b-SM-5PNUE
GBM(T=153,N=1157)	Normal	2.876	GTEX-NL3H-0011-R7a-SM-2I3G5
GBM(T=153,N=1157)	Normal	3.2205	GTEX-ZDXO-0011-R5a-SM-4WKG5
GBM(T=153,N=1157)	Normal	5.4637	GTEX-X4EP-0011-R3A-SM-3P626
GBM(T=153,N=1157)	Normal	4.551	GTEX-13N2G-0011-R3b-SM-5MR5G
GBM(T=153,N=1157)	Normal	4.0127	GTEX-T2IS-3026-SM-32QPM
GBM(T=153,N=1157)	Normal	4.3632	GTEX-14BIN-0011-R6a-SM-5S2RH
GBM(T=153,N=1157)	Normal	3.7127	GTEX-13OVH-0011-R3a-SM-5KM49
GBM(T=153,N=1157)	Normal	3.705	GTEX-P44G-0011-R4A-SM-2I3FB
GBM(T=153,N=1157)	Normal	2.5707	GTEX-13PDP-0011-R6b-SM-5O9D5
GBM(T=153,N=1157)	Normal	3.3856	GTEX-NPJ8-0011-R1a-SM-2HMLC
GBM(T=153,N=1157)	Normal	3.6759	GTEX-N7MS-0011-R7a-SM-2HMKN
GBM(T=153,N=1157)	Normal	3.7518	GTEX-13SLW-0011-R2b-SM-5O9C6
GBM(T=153,N=1157)	Normal	4.7274	GTEX-ZAJG-3026-SM-5HL92
GBM(T=153,N=1157)	Normal	4.5717	GTEX-WHSE-0011-R5A-SM-3P5ZO
GBM(T=153,N=1157)	Normal	3.3773	GTEX-11ZUS-0011-R9b-SM-5BC76
GBM(T=153,N=1157)	Normal	4.3695	GTEX-RU72-2926-SM-2TF66
GBM(T=153,N=1157)	Normal	4.4496	GTEX-Q2AG-0011-R6A-SM-2HML7
GBM(T=153,N=1157)	Normal	3.7635	GTEX-11EI6-2926-SM-5985U
GBM(T=153,N=1157)	Normal	3.623	GTEX-R55F-0011-R5A-SM-2TF5L
GBM(T=153,N=1157)	Normal	4.0985	GTEX-13FXS-0011-R10a-SM-5J2MA
GBM(T=153,N=1157)	Normal	3.5971	GTEX-13O3Q-0011-R4a-SM-5P9H2
GBM(T=153,N=1157)	Normal	4.373	GTEX-132Q8-2926-SM-5IFFP
GBM(T=153,N=1157)	Normal	3.5657	GTEX-NL3H-0011-R5a-SM-2I3GB
GBM(T=153,N=1157)	Normal	4.3456	GTEX-1399T-0011-R11a-SM-5J2O1
GBM(T=153,N=1157)	Normal	4.3031	GTEX-ZAB4-2926-SM-57WCV
GBM(T=153,N=1157)	Normal	3.9261	GTEX-13N1W-0011-R9b-SM-5MR4R
GBM(T=153,N=1157)	Normal	3.2944	GTEX-13OVL-0011-R9a-SM-5P9GX
GBM(T=153,N=1157)	Normal	3.7324	GTEX-13FXS-0011-R8a-SM-5J1MN
GBM(T=153,N=1157)	Normal	4.0926	GTEX-ZAB4-0011-R9a-SM-4SOKG
GBM(T=153,N=1157)	Normal	3.9992	GTEX-S7SE-0011-R2A-SM-2XCDC
GBM(T=153,N=1157)	Normal	3.4868	GTEX-139TT-0011-R1a-SM-5LZVD
GBM(T=153,N=1157)	Normal	4.5261	GTEX-12696-2926-SM-5FQTG
GBM(T=153,N=1157)	Normal	4.0748	GTEX-N7MT-0011-R10A-SM-2I3E1
GBM(T=153,N=1157)	Normal	5.0277	GTEX-13NYS-0011-R10a-SM-5MR4S
GBM(T=153,N=1157)	Normal	3.8085	GTEX-11NV4-0011-R5a-SM-5NQ88
GBM(T=153,N=1157)	Normal	3.4894	GTEX-13CF2-0011-R3b-SM-5LZZ6
GBM(T=153,N=1157)	Normal	3.6101	GTEX-ZVZQ-0011-R4b-SM-57WCZ
GBM(T=153,N=1157)	Normal	3.6804	GTEX-13RTJ-0011-R4b-SM-5PNX1
GBM(T=153,N=1157)	Normal	4.9833	GTEX-13NYS-0011-R11b-SM-5MR4P
GBM(T=153,N=1157)	Normal	4.2304	GTEX-T6MN-0011-R10A-SM-32QP7
GBM(T=153,N=1157)	Normal	2.6371	GTEX-NPJ8-0011-R1a-SM-33HCB
GBM(T=153,N=1157)	Normal	3.3787	GTEX-13SLW-0011-R4b-SM-5S2W2
GBM(T=153,N=1157)	Normal	3.4102	GTEX-PVOW-2526-SM-2XCF7
GBM(T=153,N=1157)	Normal	3.6816	GTEX-OHPN-0011-R10A-SM-5S2U3
GBM(T=153,N=1157)	Normal	2.5462	GTEX-13FHP-0011-R5b-SM-5LZY2
GBM(T=153,N=1157)	Normal	3.1987	GTEX-139T8-0011-R3b-SM-5HL4R
GBM(T=153,N=1157)	Normal	3.834	GTEX-ZE7O-0011-R11a-SM-57WBC
GBM(T=153,N=1157)	Normal	3.7496	GTEX-N7MT-0011-R11A-SM-2I3DZ
GBM(T=153,N=1157)	Normal	3.7741	GTEX-NL4W-0011-R5a-SM-2I3GD
GBM(T=153,N=1157)	Normal	4.1579	GTEX-147GR-0011-R10b-SM-5S2UM
GBM(T=153,N=1157)	Normal	2.8562	GTEX-ZVZQ-0011-R8a-SM-51MR5
GBM(T=153,N=1157)	Normal	3.7846	GTEX-13CIG-0011-R3b-SM-5K7XF
GBM(T=153,N=1157)	Normal	4.1128	GTEX-13SLX-0011-R5a-SM-5O9BV
GBM(T=153,N=1157)	Normal	3.1393	GTEX-13PVQ-0011-R5b-SM-5O9DI
GBM(T=153,N=1157)	Normal	4.0567	GTEX-RU72-0011-R11A-SM-5SI8G
GBM(T=153,N=1157)	Normal	4.4176	GTEX-S7SE-0011-R6A-SM-2XCD9
GBM(T=153,N=1157)	Normal	2.59	GTEX-12WSA-0011-R4a-SM-57WB7
GBM(T=153,N=1157)	Normal	3.981	GTEX-12WSH-0011-R1a-SM-5GU5V
GBM(T=153,N=1157)	Normal	3.4958	GTEX-145MI-0011-R11a-SM-5P9JZ
GBM(T=153,N=1157)	Normal	4.1563	GTEX-12WSF-0011-R5a-SM-5HL8K
GBM(T=153,N=1157)	Normal	3.5486	GTEX-PVOW-0011-R3A-SM-32PKX
GBM(T=153,N=1157)	Normal	3.9865	GTEX-145LS-3126-SM-5Q5BY
GBM(T=153,N=1157)	Normal	4.4647	GTEX-QVJO-0011-R6A-SM-2S1QN
GBM(T=153,N=1157)	Normal	3.9337	GTEX-145LS-0011-R8b-SM-5PNXA
GBM(T=153,N=1157)	Normal	4.1907	GTEX-13OW8-2926-SM-5L3FV
GBM(T=153,N=1157)	Normal	2.3677	GTEX-ZVT3-0011-R7a-SM-57WCO
GBM(T=153,N=1157)	Normal	2.7951	GTEX-QMR6-0011-R4A-SM-32PKU
GBM(T=153,N=1157)	Normal	3.9365	GTEX-P44H-0011-R6A-SM-2XCF3
GBM(T=153,N=1157)	Normal	3.7507	GTEX-P44G-0011-R7A-SM-2I3F9
GBM(T=153,N=1157)	Normal	4.4013	GTEX-R55F-0011-R6A-SM-2TF4L
GBM(T=153,N=1157)	Normal	2.9948	GTEX-YJ89-0011-R8b-SM-4SOK8
GBM(T=153,N=1157)	Normal	3.2647	GTEX-TSE9-0011-R1A-SM-3DB7E
GBM(T=153,N=1157)	Normal	3.2677	GTEX-12ZZW-0011-R6a-SM-5DUVZ
GBM(T=153,N=1157)	Normal	3.8847	GTEX-N7MS-0011-R1a-SM-2HMJG
GBM(T=153,N=1157)	Normal	4.1466	GTEX-Q2AG-0011-R3A-SM-2HMJ9
GBM(T=153,N=1157)	Normal	-9.9658	GTEX-T6MN-0011-R6A-SM-5CHQD
GBM(T=153,N=1157)	Normal	4.048	GTEX-12WSB-3026-SM-59HKM
GBM(T=153,N=1157)	Normal	4.4569	GTEX-Z93S-2826-SM-57WBL
GBM(T=153,N=1157)	Normal	4.1269	GTEX-ZE9C-3026-SM-4WKHB
GBM(T=153,N=1157)	Normal	3.2343	GTEX-ZF28-0011-R3a-SM-4WWDA
GBM(T=153,N=1157)	Normal	4.1636	GTEX-13SLX-0011-R6a-SM-5PNX4
GBM(T=153,N=1157)	Normal	4.2601	GTEX-13N1W-0011-R3a-SM-5MR5E
GBM(T=153,N=1157)	Normal	3.9223	GTEX-XOTO-0011-R3A-SM-4B64W
GBM(T=153,N=1157)	Normal	3.0498	GTEX-ZV68-0011-R10a-SM-51MT7
GBM(T=153,N=1157)	Normal	3.551	GTEX-13SLX-0011-R4a-SM-5O9BJ
GBM(T=153,N=1157)	Normal	3.5791	GTEX-147F4-0011-R10b-SM-5S2WC
GBM(T=153,N=1157)	Normal	3.866	GTEX-WZTO-0011-R7B-SM-4E3IS
GBM(T=153,N=1157)	Normal	4.3148	GTEX-WHSE-3026-SM-3P5ZH
GBM(T=153,N=1157)	Normal	3.865	GTEX-WZTO-0011-R10B-SM-4E3KB
GBM(T=153,N=1157)	Normal	4.3421	GTEX-145MI-0011-R10a-SM-5PNZD
GBM(T=153,N=1157)	Normal	3.773	GTEX-13NYB-0011-R2a-SM-5MR3C
GBM(T=153,N=1157)	Normal	3.4264	GTEX-ZUA1-0011-R1a-SM-4YCE2
GBM(T=153,N=1157)	Normal	3.3293	GTEX-12ZZZ-0011-R3b-SM-5DUXK
GBM(T=153,N=1157)	Normal	4.0636	GTEX-13O3O-0011-R7b-SM-5P9GZ
GBM(T=153,N=1157)	Normal	2.8994	GTEX-WVLH-0011-R8A-SM-3MJFC
GBM(T=153,N=1157)	Normal	3.6417	GTEX-131XH-0011-R4b-SM-5DUWB
GBM(T=153,N=1157)	Normal	3.8157	GTEX-147GR-0011-R9a-SM-5S2UY
GBM(T=153,N=1157)	Normal	4.2951	GTEX-13O3Q-3026-SM-5IJGD
GBM(T=153,N=1157)	Normal	2.7572	GTEX-ZVT3-0011-R6a-SM-51MSU
GBM(T=153,N=1157)	Normal	5.428	GTEX-X4EP-0011-R8B-SM-4QASL
GBM(T=153,N=1157)	Normal	4.2189	GTEX-YJ89-2926-SM-5P9IT
GBM(T=153,N=1157)	Normal	4.3256	GTEX-ZAK1-2926-SM-5HL9S
GBM(T=153,N=1157)	Normal	4.1161	GTEX-11TUW-3126-SM-5GU4Y
GBM(T=153,N=1157)	Normal	4.359	GTEX-XLM4-0011-R11A-SM-4AT46
GBM(T=153,N=1157)	Normal	3.6759	GTEX-T5JC-0011-R1A-SM-32PM6
GBM(T=153,N=1157)	Normal	3.8177	GTEX-13QIC-0011-R4a-SM-5PNX8
GBM(T=153,N=1157)	Normal	3.0446	GTEX-13CF2-0011-R2a-SM-5L3DC
GBM(T=153,N=1157)	Normal	4.2472	GTEX-N7MS-0011-R5a-SM-2HMK8
GBM(T=153,N=1157)	Normal	2.3981	GTEX-ZDXO-0011-R2b-SM-4WKFG
GBM(T=153,N=1157)	Normal	4.2646	GTEX-13G51-0011-R7b-SM-5LZXG
GBM(T=153,N=1157)	Normal	4.2929	GTEX-X585-0011-R3B-SM-46MVG
GBM(T=153,N=1157)	Normal	4.0756	GTEX-13FLV-0011-R5a-SM-5LZWT
GBM(T=153,N=1157)	Normal	4.2297	GTEX-13FHP-2926-SM-5IJG9
GBM(T=153,N=1157)	Normal	4.232	GTEX-12WSC-0011-R3a-SM-5P9F1
GBM(T=153,N=1157)	Normal	3.5803	GTEX-12WSA-0011-R10b-SM-5P9ET
GBM(T=153,N=1157)	Normal	4.9175	GTEX-11O72-2826-SM-5HL6W
GBM(T=153,N=1157)	Normal	3.9002	GTEX-11EI6-3026-SM-5GZZO
GBM(T=153,N=1157)	Normal	2.8482	GTEX-148VJ-0011-R9b-SM-5SI77
GBM(T=153,N=1157)	Normal	4.3576	GTEX-N7MT-1226-SM-2D7W4
GBM(T=153,N=1157)	Normal	-9.9658	GTEX-T6MN-0011-R10A-SM-5CHQC
GBM(T=153,N=1157)	Normal	4.5994	GTEX-11WQK-0011-R11a-SM-5BC6W
GBM(T=153,N=1157)	Normal	4.504	GTEX-12WSC-0011-R7b-SM-5LU9L
GBM(T=153,N=1157)	Normal	3.6532	GTEX-12WSH-3026-SM-5CVNI
GBM(T=153,N=1157)	Normal	3.6838	GTEX-XLM4-0011-R4B-SM-4AT5C
GBM(T=153,N=1157)	Normal	4.1915	GTEX-13OVJ-0011-R8b-SM-5L3FS
GBM(T=153,N=1157)	Normal	3.668	GTEX-13OW5-0011-R8a-SM-5L3GQ
GBM(T=153,N=1157)	Normal	4.1161	GTEX-X4XX-0011-R10B-SM-46MWO
GBM(T=153,N=1157)	Normal	3.8208	GTEX-145MG-3126-SM-5Q5D3
GBM(T=153,N=1157)	Normal	2.8661	GTEX-13NZ8-0011-R8b-SM-5KM48
GBM(T=153,N=1157)	Normal	3.4804	GTEX-12WSH-0011-R2a-SM-5GU68
GBM(T=153,N=1157)	Normal	4.0807	GTEX-131YS-0011-R3b-SM-5DUXB
GBM(T=153,N=1157)	Normal	3.5262	GTEX-12ZZZ-3026-SM-5BC67
GBM(T=153,N=1157)	Normal	4.2488	TCGA-06-0678-11
GBM(T=153,N=1157)	Normal	4.425	GTEX-XMD1-0011-R8A-SM-4AT48
GBM(T=153,N=1157)	Normal	3.7741	GTEX-QDT8-0011-R11A-SM-32PKD
GBM(T=153,N=1157)	Normal	4.2056	GTEX-145LS-0011-R6b-SM-5PNWL
GBM(T=153,N=1157)	Normal	3.5299	GTEX-11OF3-0011-R8b-SM-57WCS
GBM(T=153,N=1157)	Normal	3.6635	GTEX-PVOW-0011-R1A-SM-32PL6
GBM(T=153,N=1157)	Normal	4.0739	GTEX-QVJO-0011-R8A-SM-447C7
GBM(T=153,N=1157)	Normal	4.573	GTEX-QVJO-0011-R5A-SM-2S1QM
GBM(T=153,N=1157)	Normal	4.2095	GTEX-WZTO-0011-R6B-SM-4E3J6
GBM(T=153,N=1157)	Normal	4.0019	GTEX-13O3O-3026-SM-5KM42
GBM(T=153,N=1157)	Normal	4.1228	GTEX-13X6J-0011-R6a-SM-5PNUB
GBM(T=153,N=1157)	Normal	4.3378	GTEX-ZYFD-3026-SM-5E44C
GBM(T=153,N=1157)	Normal	3.837	GTEX-13QIC-0011-R3a-SM-5P9HT
GBM(T=153,N=1157)	Normal	2.3788	GTEX-13NZ8-0011-R1b-SM-5KM3V
GBM(T=153,N=1157)	Normal	4.1772	GTEX-14BMV-3026-SM-5S2PQ
GBM(T=153,N=1157)	Normal	4.6804	GTEX-13NYS-0011-R6b-SM-5MR3R
GBM(T=153,N=1157)	Normal	3.9089	GTEX-13OW8-0011-R11a-SM-5L3GT
GBM(T=153,N=1157)	Normal	3.991	GTEX-139TS-3126-SM-5LZWX
GBM(T=153,N=1157)	Normal	3.4517	GTEX-XOTO-0011-R6B-SM-4B65X
GBM(T=153,N=1157)	Normal	4.3435	GTEX-RNOR-0011-R7A-SM-2TF4V
GBM(T=153,N=1157)	Normal	4.1796	GTEX-X4XX-0011-R6B-SM-46MWP
GBM(T=153,N=1157)	Normal	4.4628	GTEX-13O3Q-0011-R11b-SM-5KM2W
GBM(T=153,N=1157)	Normal	3.8208	GTEX-145MH-0011-R1b-SM-5PNWY
GBM(T=153,N=1157)	Normal	3.9496	GTEX-ZE7O-3126-SM-5HL5X
GBM(T=153,N=1157)	Normal	4.3765	GTEX-13G51-3126-SM-5IJG7
GBM(T=153,N=1157)	Normal	2.3193	GTEX-1477Z-0011-R5b-SM-5PNUO
GBM(T=153,N=1157)	Normal	3.3675	GTEX-RVPV-0011-R3A-SM-2TF63
GBM(T=153,N=1157)	Normal	4.3456	GTEX-13FXS-3026-SM-5LZYO
GBM(T=153,N=1157)	Normal	3.7248	GTEX-ZDXO-0011-R10a-SM-4WWD8
GBM(T=153,N=1157)	Normal	4.0454	GTEX-144GO-0011-R6b-SM-5S2V7
GBM(T=153,N=1157)	Normal	2.8877	GTEX-13PLJ-0011-R3a-SM-5O9DT
GBM(T=153,N=1157)	Normal	3.5875	GTEX-13QIC-2926-SM-5J2NF
GBM(T=153,N=1157)	Normal	3.5174	GTEX-145MI-0011-R8b-SM-5PNZ9
GBM(T=153,N=1157)	Normal	3.4034	GTEX-12ZZX-0011-R7b-SM-5DUVV
GBM(T=153,N=1157)	Normal	4.3841	GTEX-111FC-3326-SM-5GZYV
GBM(T=153,N=1157)	Normal	3.832	GTEX-Z93S-0011-R10a-SM-4RGNM
GBM(T=153,N=1157)	Normal	3.7259	GTEX-YFC4-0011-R6b-SM-4V6E1
GBM(T=153,N=1157)	Normal	4.1094	GTEX-13OW7-0011-R11a-SM-5O9DY
GBM(T=153,N=1157)	Normal	4.4142	GTEX-T2IS-0011-R11A-SM-32QPC
GBM(T=153,N=1157)	Normal	3.3856	GTEX-XOTO-0011-R5A-SM-4B657
GBM(T=153,N=1157)	Normal	3.9412	GTEX-139T4-0011-R9b-SM-5HL6S
GBM(T=153,N=1157)	Normal	4.3213	GTEX-13VXU-0011-R11b-SM-5O9DJ
GBM(T=153,N=1157)	Normal	3.0305	GTEX-139TS-0011-R5b-SM-5J2MZ
GBM(T=153,N=1157)	Normal	4.1506	GTEX-11OF3-0011-R5a-SM-57WB4
GBM(T=153,N=1157)	Normal	3.8002	GTEX-Q2AG-0011-R7A-SM-2HMJP
GBM(T=153,N=1157)	Normal	4.5466	GTEX-13X6K-2826-SM-5O9DS
GBM(T=153,N=1157)	Normal	3.8198	GTEX-1399T-0011-R1b-SM-5DUWN
GBM(T=153,N=1157)	Normal	4.4647	GTEX-XLM4-2926-SM-4AT59
GBM(T=153,N=1157)	Normal	3.9691	GTEX-131XH-0011-R3b-SM-5DUWM
GBM(T=153,N=1157)	Normal	4.3786	GTEX-1192X-3226-SM-5987D
GBM(T=153,N=1157)	Normal	3.4464	GTEX-ZVZQ-0011-R5b-SM-57WDC
GBM(T=153,N=1157)	Normal	4.3716	GTEX-13X6K-0011-R8b-SM-5PNZ4
GBM(T=153,N=1157)	Normal	3.6382	GTEX-12ZZZ-0011-R6b-SM-5EQ5B
GBM(T=153,N=1157)	Normal	4.3017	GTEX-13G51-0011-R6b-SM-5LZX4
GBM(T=153,N=1157)	Normal	4.3299	GTEX-YFC4-0011-R10a-SM-4SOK5
GBM(T=153,N=1157)	Normal	3.5547	GTEX-13112-0011-R4b-SM-5DUXL
GBM(T=153,N=1157)	Normal	3.9506	GTEX-1313W-0011-R1b-SM-5EQ4A
GBM(T=153,N=1157)	Normal	4.3513	GTEX-Q2AG-2826-SM-2HMJQ
GBMLGG(T=662,N=1157)	Tumor	5.4456	TCGA-19-1787-01
GBMLGG(T=662,N=1157)	Tumor	3.9765	TCGA-S9-A7J2-01
GBMLGG(T=662,N=1157)	Tumor	4.6095	TCGA-E1-A7YI-01
GBMLGG(T=662,N=1157)	Tumor	5.7088	TCGA-06-5412-01
GBMLGG(T=662,N=1157)	Tumor	3.8521	TCGA-DU-7302-01
GBMLGG(T=662,N=1157)	Tumor	4.89	TCGA-DU-A7TI-01
GBMLGG(T=662,N=1157)	Tumor	5.1603	TCGA-16-0846-01
GBMLGG(T=662,N=1157)	Tumor	5.5772	TCGA-12-5299-01
GBMLGG(T=662,N=1157)	Tumor	4.9901	TCGA-P5-A5EX-01
GBMLGG(T=662,N=1157)	Tumor	4.9846	TCGA-HT-8563-01
GBMLGG(T=662,N=1157)	Tumor	4.3632	TCGA-06-2561-01
GBMLGG(T=662,N=1157)	Tumor	5.4077	TCGA-DU-7012-01
GBMLGG(T=662,N=1157)	Tumor	4.4836	TCGA-E1-5322-01
GBMLGG(T=662,N=1157)	Tumor	4.3758	TCGA-HT-8558-01
GBMLGG(T=662,N=1157)	Tumor	4.7882	TCGA-S9-A6U8-01
GBMLGG(T=662,N=1157)	Tumor	4.6977	TCGA-CS-5393-01
GBMLGG(T=662,N=1157)	Tumor	4.7258	TCGA-HT-7854-01
GBMLGG(T=662,N=1157)	Tumor	4.2571	TCGA-HT-7874-01
GBMLGG(T=662,N=1157)	Tumor	5.0972	TCGA-RY-A845-01
GBMLGG(T=662,N=1157)	Tumor	5.4043	TCGA-06-0132-01
GBMLGG(T=662,N=1157)	Tumor	4.1628	TCGA-HT-7616-01
GBMLGG(T=662,N=1157)	Tumor	5.178	TCGA-KT-A7W1-01
GBMLGG(T=662,N=1157)	Tumor	3.8611	TCGA-P5-A5F2-01
GBMLGG(T=662,N=1157)	Tumor	4.1449	TCGA-26-5136-01
GBMLGG(T=662,N=1157)	Tumor	4.3002	TCGA-27-2521-01
GBMLGG(T=662,N=1157)	Tumor	4.594	TCGA-19-2629-01
GBMLGG(T=662,N=1157)	Tumor	5.0769	TCGA-06-0238-01
GBMLGG(T=662,N=1157)	Tumor	5.5522	TCGA-06-0749-01
GBMLGG(T=662,N=1157)	Tumor	3.6463	TCGA-CS-5396-01
GBMLGG(T=662,N=1157)	Tumor	4.4919	TCGA-HT-7680-01
GBMLGG(T=662,N=1157)	Tumor	4.7187	TCGA-S9-A7IS-01
GBMLGG(T=662,N=1157)	Tumor	5.3639	TCGA-06-0174-01
GBMLGG(T=662,N=1157)	Tumor	3.9242	TCGA-HW-7486-01
GBMLGG(T=662,N=1157)	Tumor	5.8878	TCGA-P5-A5F1-01
GBMLGG(T=662,N=1157)	Tumor	4.5274	TCGA-DU-7011-01
GBMLGG(T=662,N=1157)	Tumor	5.823	TCGA-06-5414-01
GBMLGG(T=662,N=1157)	Tumor	3.5959	TCGA-P5-A77X-01
GBMLGG(T=662,N=1157)	Tumor	5.4486	TCGA-28-5207-01
GBMLGG(T=662,N=1157)	Tumor	4.6312	TCGA-VM-A8CA-01
GBMLGG(T=662,N=1157)	Tumor	4.9928	TCGA-DU-7015-01
GBMLGG(T=662,N=1157)	Tumor	3.8157	TCGA-TM-A7C5-01
GBMLGG(T=662,N=1157)	Tumor	4.2987	TCGA-DU-8162-01
GBMLGG(T=662,N=1157)	Tumor	4.2033	TCGA-TM-A84O-01
GBMLGG(T=662,N=1157)	Tumor	5.6625	TCGA-06-5410-01
GBMLGG(T=662,N=1157)	Tumor	5.4784	TCGA-06-0747-01
GBMLGG(T=662,N=1157)	Tumor	4.1482	TCGA-FG-A60K-01
GBMLGG(T=662,N=1157)	Tumor	4.2472	TCGA-S9-A7R3-01
GBMLGG(T=662,N=1157)	Tumor	3.7752	TCGA-TQ-A7RN-01
GBMLGG(T=662,N=1157)	Tumor	6.1717	TCGA-28-2513-01
GBMLGG(T=662,N=1157)	Tumor	4.1161	TCGA-DU-A6S6-01
GBMLGG(T=662,N=1157)	Tumor	4.8724	TCGA-S9-A7R2-01
GBMLGG(T=662,N=1157)	Tumor	5.0862	TCGA-P5-A735-01
GBMLGG(T=662,N=1157)	Tumor	5.1938	TCGA-76-4927-01
GBMLGG(T=662,N=1157)	Tumor	4.9718	TCGA-HT-7691-01
GBMLGG(T=662,N=1157)	Tumor	4.6277	TCGA-FG-A6J1-01
GBMLGG(T=662,N=1157)	Tumor	5.5607	TCGA-DU-6402-01
GBMLGG(T=662,N=1157)	Tumor	5.5988	TCGA-HT-8104-01
GBMLGG(T=662,N=1157)	Tumor	4.8425	TCGA-FN-7833-01
GBMLGG(T=662,N=1157)	Tumor	5.1186	TCGA-HT-7473-01
GBMLGG(T=662,N=1157)	Tumor	5.4202	TCGA-06-0645-01
GBMLGG(T=662,N=1157)	Tumor	5.8056	TCGA-06-2565-01
GBMLGG(T=662,N=1157)	Tumor	4.3009	TCGA-HT-8019-01
GBMLGG(T=662,N=1157)	Tumor	5.9213	TCGA-06-0130-01
GBMLGG(T=662,N=1157)	Tumor	5.7342	TCGA-06-0750-01
GBMLGG(T=662,N=1157)	Tumor	4.0242	TCGA-DB-A4XF-01
GBMLGG(T=662,N=1157)	Tumor	5.9432	TCGA-HT-A5RA-01
GBMLGG(T=662,N=1157)	Tumor	5.4845	TCGA-E1-A7YL-01
GBMLGG(T=662,N=1157)	Tumor	5.5497	TCGA-27-1831-01
GBMLGG(T=662,N=1157)	Tumor	5.1347	TCGA-HT-A61B-01
GBMLGG(T=662,N=1157)	Tumor	4.8064	TCGA-TM-A7CA-01
GBMLGG(T=662,N=1157)	Tumor	4.8709	TCGA-06-5416-01
GBMLGG(T=662,N=1157)	Tumor	4.4549	TCGA-HT-7684-01
GBMLGG(T=662,N=1157)	Tumor	3.5863	TCGA-HW-8322-01
GBMLGG(T=662,N=1157)	Tumor	5.0414	TCGA-S9-A6U9-01
GBMLGG(T=662,N=1157)	Tumor	5.0786	TCGA-HT-7676-01
GBMLGG(T=662,N=1157)	Tumor	4.1692	TCGA-HT-7469-01
GBMLGG(T=662,N=1157)	Tumor	4.6329	TCGA-DH-A7UU-01
GBMLGG(T=662,N=1157)	Tumor	4.6439	TCGA-HT-7873-01
GBMLGG(T=662,N=1157)	Tumor	4.6329	TCGA-HW-A5KK-01
GBMLGG(T=662,N=1157)	Tumor	3.907	TCGA-DB-A64P-01
GBMLGG(T=662,N=1157)	Tumor	4.8635	TCGA-HT-7478-01
GBMLGG(T=662,N=1157)	Tumor	3.5187	TCGA-S9-A6TX-01
GBMLGG(T=662,N=1157)	Tumor	4.2995	TCGA-RY-A83Z-01
GBMLGG(T=662,N=1157)	Tumor	4.9031	TCGA-FG-6688-01
GBMLGG(T=662,N=1157)	Tumor	5.2001	TCGA-06-0141-01
GBMLGG(T=662,N=1157)	Tumor	5.2438	TCGA-06-0125-01
GBMLGG(T=662,N=1157)	Tumor	4.5862	TCGA-FG-A4MT-01
GBMLGG(T=662,N=1157)	Tumor	4.6479	TCGA-76-4925-01
GBMLGG(T=662,N=1157)	Tumor	4.5053	TCGA-FG-A6IZ-01
GBMLGG(T=662,N=1157)	Tumor	4.3646	TCGA-HT-8113-01
GBMLGG(T=662,N=1157)	Tumor	4.8253	TCGA-DH-A7UT-01
GBMLGG(T=662,N=1157)	Tumor	5.5635	TCGA-76-4932-01
GBMLGG(T=662,N=1157)	Tumor	3.7518	TCGA-EZ-7264-01
GBMLGG(T=662,N=1157)	Tumor	4.7856	TCGA-TQ-A7RF-01
GBMLGG(T=662,N=1157)	Tumor	4.7709	TCGA-28-2510-01
GBMLGG(T=662,N=1157)	Tumor	2.9655	TCGA-DB-5274-01
GBMLGG(T=662,N=1157)	Tumor	3.8964	TCGA-S9-A7R8-01
GBMLGG(T=662,N=1157)	Tumor	4.1086	TCGA-FG-7641-01
GBMLGG(T=662,N=1157)	Tumor	4.2884	TCGA-HW-7495-01
GBMLGG(T=662,N=1157)	Tumor	3.832	TCGA-CS-6669-01
GBMLGG(T=662,N=1157)	Tumor	3.9865	TCGA-HT-7481-01
GBMLGG(T=662,N=1157)	Tumor	4.8064	TCGA-DU-8163-01
GBMLGG(T=662,N=1157)	Tumor	4.0269	TCGA-S9-A6WD-01
GBMLGG(T=662,N=1157)	Tumor	4.5886	TCGA-CS-4942-01
GBMLGG(T=662,N=1157)	Tumor	5.1942	TCGA-HT-8110-01
GBMLGG(T=662,N=1157)	Tumor	5.1152	TCGA-HT-8106-01
GBMLGG(T=662,N=1157)	Tumor	4.6543	TCGA-QH-A6CW-01
GBMLGG(T=662,N=1157)	Tumor	4.0515	TCGA-RY-A840-01
GBMLGG(T=662,N=1157)	Tumor	6.1357	TCGA-06-0743-01
GBMLGG(T=662,N=1157)	Tumor	4.7856	TCGA-HW-8319-01
GBMLGG(T=662,N=1157)	Tumor	4.5466	TCGA-HT-7482-01
GBMLGG(T=662,N=1157)	Tumor	4.096	TCGA-DU-5870-01
GBMLGG(T=662,N=1157)	Tumor	3.6657	TCGA-E1-5304-01
GBMLGG(T=662,N=1157)	Tumor	4.0833	TCGA-TM-A84S-01
GBMLGG(T=662,N=1157)	Tumor	4.3463	TCGA-CS-4943-01
GBMLGG(T=662,N=1157)	Tumor	4.7555	TCGA-E1-A7Z3-01
GBMLGG(T=662,N=1157)	Tumor	5.7225	TCGA-14-1034-01
GBMLGG(T=662,N=1157)	Tumor	5.6902	TCGA-06-0184-01
GBMLGG(T=662,N=1157)	Tumor	6.0723	TCGA-12-3652-01
GBMLGG(T=662,N=1157)	Tumor	4.8689	TCGA-FG-8182-01
GBMLGG(T=662,N=1157)	Tumor	5.0032	TCGA-26-5132-01
GBMLGG(T=662,N=1157)	Tumor	4.9937	TCGA-DU-A5TW-01
GBMLGG(T=662,N=1157)	Tumor	5.5895	TCGA-TQ-A7RP-01
GBMLGG(T=662,N=1157)	Tumor	4.0636	TCGA-HT-7689-01
GBMLGG(T=662,N=1157)	Tumor	4.0278	TCGA-FG-7638-01
GBMLGG(T=662,N=1157)	Tumor	5.0117	TCGA-32-1970-01
GBMLGG(T=662,N=1157)	Tumor	4.5186	TCGA-P5-A5EV-01
GBMLGG(T=662,N=1157)	Tumor	4.3695	TCGA-HT-7476-01
GBMLGG(T=662,N=1157)	Tumor	4.1153	TCGA-TQ-A7RG-01
GBMLGG(T=662,N=1157)	Tumor	5.044	TCGA-TM-A84F-01
GBMLGG(T=662,N=1157)	Tumor	4.1828	TCGA-FG-8181-01
GBMLGG(T=662,N=1157)	Tumor	4.3618	TCGA-DU-A7T6-01
GBMLGG(T=662,N=1157)	Tumor	4.8284	TCGA-DB-A4XC-01
GBMLGG(T=662,N=1157)	Tumor	5.8435	TCGA-06-0219-01
GBMLGG(T=662,N=1157)	Tumor	5.8868	TCGA-14-0787-01
GBMLGG(T=662,N=1157)	Tumor	4.2289	TCGA-S9-A6U2-01
GBMLGG(T=662,N=1157)	Tumor	4.8895	TCGA-DB-A75M-01
GBMLGG(T=662,N=1157)	Tumor	3.9947	TCGA-HT-8012-01
GBMLGG(T=662,N=1157)	Tumor	4.2064	TCGA-S9-A7QW-01
GBMLGG(T=662,N=1157)	Tumor	4.3278	TCGA-P5-A733-01
GBMLGG(T=662,N=1157)	Tumor	4.6142	TCGA-E1-A7Z4-01
GBMLGG(T=662,N=1157)	Tumor	5.2126	TCGA-FG-8185-01
GBMLGG(T=662,N=1157)	Tumor	5.1954	TCGA-FG-A4MW-01
GBMLGG(T=662,N=1157)	Tumor	4.943	TCGA-HW-8320-01
GBMLGG(T=662,N=1157)	Tumor	4.17	TCGA-DU-5849-01
GBMLGG(T=662,N=1157)	Tumor	5.9234	TCGA-06-0190-01
GBMLGG(T=662,N=1157)	Tumor	5.1002	TCGA-DB-5273-01
GBMLGG(T=662,N=1157)	Tumor	4.0419	TCGA-R8-A6MO-01
GBMLGG(T=662,N=1157)	Tumor	3.7992	TCGA-CS-6670-01
GBMLGG(T=662,N=1157)	Tumor	4.696	TCGA-DU-5854-01
GBMLGG(T=662,N=1157)	Tumor	4.3449	TCGA-S9-A6WL-01
GBMLGG(T=662,N=1157)	Tumor	4.9012	TCGA-S9-A6TV-01
GBMLGG(T=662,N=1157)	Tumor	5.4453	TCGA-26-5135-01
GBMLGG(T=662,N=1157)	Tumor	4.2281	TCGA-S9-A6WE-01
GBMLGG(T=662,N=1157)	Tumor	5.6539	TCGA-76-4931-01
GBMLGG(T=662,N=1157)	Tumor	4.8218	TCGA-QH-A6XA-01
GBMLGG(T=662,N=1157)	Tumor	3.838	TCGA-DU-6393-01
GBMLGG(T=662,N=1157)	Tumor	5.2312	TCGA-41-3915-01
GBMLGG(T=662,N=1157)	Tumor	5.1611	TCGA-VM-A8C9-01
GBMLGG(T=662,N=1157)	Tumor	5.3674	TCGA-06-0649-01
GBMLGG(T=662,N=1157)	Tumor	4.9505	TCGA-DU-5853-01
GBMLGG(T=662,N=1157)	Tumor	5.3248	TCGA-12-0618-01
GBMLGG(T=662,N=1157)	Tumor	4.3999	TCGA-FG-5962-01
GBMLGG(T=662,N=1157)	Tumor	6.3212	TCGA-27-2524-01
GBMLGG(T=662,N=1157)	Tumor	4.9213	TCGA-QH-A65S-01
GBMLGG(T=662,N=1157)	Tumor	5.1173	TCGA-F6-A8O4-01
GBMLGG(T=662,N=1157)	Tumor	4.7165	TCGA-28-1753-01
GBMLGG(T=662,N=1157)	Tumor	5.1194	TCGA-QH-A870-01
GBMLGG(T=662,N=1157)	Tumor	3.4344	TCGA-S9-A7R1-01
GBMLGG(T=662,N=1157)	Tumor	4.3133	TCGA-TQ-A7RH-01
GBMLGG(T=662,N=1157)	Tumor	6.0293	TCGA-12-5295-01
GBMLGG(T=662,N=1157)	Tumor	5.5705	TCGA-E1-A7YQ-01
GBMLGG(T=662,N=1157)	Tumor	5.8538	TCGA-27-2523-01
GBMLGG(T=662,N=1157)	Tumor	4.2586	TCGA-HT-8107-01
GBMLGG(T=662,N=1157)	Tumor	4.2624	TCGA-P5-A5ET-01
GBMLGG(T=662,N=1157)	Tumor	5.2634	TCGA-P5-A72W-01
GBMLGG(T=662,N=1157)	Tumor	3.8837	TCGA-DB-A64L-01
GBMLGG(T=662,N=1157)	Tumor	4.8605	TCGA-HW-7493-01
GBMLGG(T=662,N=1157)	Tumor	4.2181	TCGA-TM-A84R-01
GBMLGG(T=662,N=1157)	Tumor	3.8157	TCGA-HT-A74L-01
GBMLGG(T=662,N=1157)	Tumor	4.8238	TCGA-HT-7477-01
GBMLGG(T=662,N=1157)	Tumor	4.9524	TCGA-FG-A87Q-01
GBMLGG(T=662,N=1157)	Tumor	4.9213	TCGA-FG-A70Z-01
GBMLGG(T=662,N=1157)	Tumor	5.489	TCGA-FG-A4MU-01
GBMLGG(T=662,N=1157)	Tumor	4.5736	TCGA-DB-A4XB-01
GBMLGG(T=662,N=1157)	Tumor	5.1301	TCGA-WY-A85D-01
GBMLGG(T=662,N=1157)	Tumor	4.9723	TCGA-DU-A5TR-01
GBMLGG(T=662,N=1157)	Tumor	4.9987	TCGA-CS-4941-01
GBMLGG(T=662,N=1157)	Tumor	4.3492	TCGA-HT-A615-01
GBMLGG(T=662,N=1157)	Tumor	4.711	TCGA-06-2569-01
GBMLGG(T=662,N=1157)	Tumor	4.5856	TCGA-HT-A5RB-01
GBMLGG(T=662,N=1157)	Tumor	5.0215	TCGA-E1-A7YN-01
GBMLGG(T=662,N=1157)	Tumor	5.4162	TCGA-27-1830-01
GBMLGG(T=662,N=1157)	Tumor	5.2851	TCGA-QH-A6XC-01
GBMLGG(T=662,N=1157)	Tumor	4.7388	TCGA-06-2559-01
GBMLGG(T=662,N=1157)	Tumor	4.2396	TCGA-S9-A6WN-01
GBMLGG(T=662,N=1157)	Tumor	4.8334	TCGA-P5-A72X-01
GBMLGG(T=662,N=1157)	Tumor	4.1186	TCGA-WY-A858-01
GBMLGG(T=662,N=1157)	Tumor	4.3814	TCGA-DU-7014-01
GBMLGG(T=662,N=1157)	Tumor	5.9725	TCGA-27-2526-01
GBMLGG(T=662,N=1157)	Tumor	5.4165	TCGA-VM-A8CF-01
GBMLGG(T=662,N=1157)	Tumor	5.2983	TCGA-06-5856-01
GBMLGG(T=662,N=1157)	Tumor	5.3252	TCGA-26-1442-01
GBMLGG(T=662,N=1157)	Tumor	4.9773	TCGA-CS-4938-01
GBMLGG(T=662,N=1157)	Tumor	4.1078	TCGA-DU-8166-01
GBMLGG(T=662,N=1157)	Tumor	4.1859	TCGA-DU-7300-01
GBMLGG(T=662,N=1157)	Tumor	4.8125	TCGA-DU-7292-01
GBMLGG(T=662,N=1157)	Tumor	5.1384	TCGA-DB-A75P-01
GBMLGG(T=662,N=1157)	Tumor	5.8372	TCGA-06-5418-01
GBMLGG(T=662,N=1157)	Tumor	4.7872	TCGA-FG-6691-01
GBMLGG(T=662,N=1157)	Tumor	5.278	TCGA-26-5139-01
GBMLGG(T=662,N=1157)	Tumor	4.1044	TCGA-06-5417-01
GBMLGG(T=662,N=1157)	Tumor	3.9137	TCGA-DB-5279-01
GBMLGG(T=662,N=1157)	Tumor	4.4081	TCGA-S9-A6WI-01
GBMLGG(T=662,N=1157)	Tumor	4.9026	TCGA-DB-A64S-01
GBMLGG(T=662,N=1157)	Tumor	5.0798	TCGA-FG-6692-01
GBMLGG(T=662,N=1157)	Tumor	4.8223	TCGA-HW-7489-01
GBMLGG(T=662,N=1157)	Tumor	4.8334	TCGA-R8-A6YH-01
GBMLGG(T=662,N=1157)	Tumor	1.9712	TCGA-26-5134-01
GBMLGG(T=662,N=1157)	Tumor	5.2032	TCGA-HT-8114-01
GBMLGG(T=662,N=1157)	Tumor	5.1831	TCGA-TM-A84H-01
GBMLGG(T=662,N=1157)	Tumor	4.1852	TCGA-DB-A64V-01
GBMLGG(T=662,N=1157)	Tumor	4.6651	TCGA-DU-7019-01
GBMLGG(T=662,N=1157)	Tumor	4.4364	TCGA-S9-A7R4-01
GBMLGG(T=662,N=1157)	Tumor	3.9608	TCGA-S9-A7J3-01
GBMLGG(T=662,N=1157)	Tumor	5.0943	TCGA-TM-A84L-01
GBMLGG(T=662,N=1157)	Tumor	4.9691	TCGA-E1-A7YH-01
GBMLGG(T=662,N=1157)	Tumor	5.3941	TCGA-06-5413-01
GBMLGG(T=662,N=1157)	Tumor	5.0566	TCGA-76-4929-01
GBMLGG(T=662,N=1157)	Tumor	5.478	TCGA-06-0646-01
GBMLGG(T=662,N=1157)	Tumor	4.2609	TCGA-QH-A65Z-01
GBMLGG(T=662,N=1157)	Tumor	5.0532	TCGA-DU-A7TD-01
GBMLGG(T=662,N=1157)	Tumor	4.8425	TCGA-DU-5871-01
GBMLGG(T=662,N=1157)	Tumor	4.2358	TCGA-HW-A5KL-01
GBMLGG(T=662,N=1157)	Tumor	4.0807	TCGA-RY-A83X-01
GBMLGG(T=662,N=1157)	Tumor	4.0935	TCGA-HT-7687-01
GBMLGG(T=662,N=1157)	Tumor	4.6218	TCGA-HT-A4DV-01
GBMLGG(T=662,N=1157)	Tumor	4.7121	TCGA-WY-A85A-01
GBMLGG(T=662,N=1157)	Tumor	5.528	TCGA-12-3650-01
GBMLGG(T=662,N=1157)	Tumor	5.254	TCGA-19-2620-01
GBMLGG(T=662,N=1157)	Tumor	4.7965	TCGA-DB-5281-01
GBMLGG(T=662,N=1157)	Tumor	4.9189	TCGA-E1-A7YK-01
GBMLGG(T=662,N=1157)	Tumor	5.8169	TCGA-28-5213-01
GBMLGG(T=662,N=1157)	Tumor	4.8485	TCGA-DU-A7TA-01
GBMLGG(T=662,N=1157)	Tumor	4.9079	TCGA-CS-5395-01
GBMLGG(T=662,N=1157)	Tumor	3.7992	TCGA-DH-A7UR-01
GBMLGG(T=662,N=1157)	Tumor	3.907	TCGA-DU-6400-01
GBMLGG(T=662,N=1157)	Tumor	5.5448	TCGA-06-0138-01
GBMLGG(T=662,N=1157)	Tumor	5.5423	TCGA-HT-A5R5-01
GBMLGG(T=662,N=1157)	Tumor	4.7777	TCGA-HT-8018-01
GBMLGG(T=662,N=1157)	Tumor	3.8033	TCGA-FG-A713-01
GBMLGG(T=662,N=1157)	Tumor	4.3903	TCGA-S9-A6WP-01
GBMLGG(T=662,N=1157)	Tumor	4.4509	TCGA-S9-A6U5-01
GBMLGG(T=662,N=1157)	Tumor	3.8739	TCGA-E1-A7YO-01
GBMLGG(T=662,N=1157)	Tumor	4.2173	TCGA-FG-A710-01
GBMLGG(T=662,N=1157)	Tumor	4.0471	TCGA-QH-A6X8-01
GBMLGG(T=662,N=1157)	Tumor	5.4631	TCGA-06-5415-01
GBMLGG(T=662,N=1157)	Tumor	3.7529	TCGA-HT-7610-01
GBMLGG(T=662,N=1157)	Tumor	3.863	TCGA-HT-7875-01
GBMLGG(T=662,N=1157)	Tumor	3.5923	TCGA-DU-A6S3-01
GBMLGG(T=662,N=1157)	Tumor	4.4033	TCGA-R8-A6MK-01
GBMLGG(T=662,N=1157)	Tumor	4.079	TCGA-P5-A5F0-01
GBMLGG(T=662,N=1157)	Tumor	5.337	TCGA-06-0139-01
GBMLGG(T=662,N=1157)	Tumor	5.1223	TCGA-02-0047-01
GBMLGG(T=662,N=1157)	Tumor	5.1173	TCGA-S9-A6TS-01
GBMLGG(T=662,N=1157)	Tumor	3.9663	TCGA-S9-A6TW-01
GBMLGG(T=662,N=1157)	Tumor	5.0343	TCGA-E1-5303-01
GBMLGG(T=662,N=1157)	Tumor	4.9603	TCGA-DU-7299-01
GBMLGG(T=662,N=1157)	Tumor	4.6195	TCGA-DH-5140-01
GBMLGG(T=662,N=1157)	Tumor	4.9626	TCGA-S9-A7QX-01
GBMLGG(T=662,N=1157)	Tumor	4.0807	TCGA-DU-6408-01
GBMLGG(T=662,N=1157)	Tumor	5.7882	TCGA-14-0789-01
GBMLGG(T=662,N=1157)	Tumor	4.6708	TCGA-FG-5964-01
GBMLGG(T=662,N=1157)	Tumor	3.97	TCGA-DB-A64Q-01
GBMLGG(T=662,N=1157)	Tumor	4.067	TCGA-S9-A6WH-01
GBMLGG(T=662,N=1157)	Tumor	4.9327	TCGA-12-0616-01
GBMLGG(T=662,N=1157)	Tumor	4.0348	TCGA-DU-A6S8-01
GBMLGG(T=662,N=1157)	Tumor	4.918	TCGA-HT-7858-01
GBMLGG(T=662,N=1157)	Tumor	5.5116	TCGA-32-1982-01
GBMLGG(T=662,N=1157)	Tumor	5.8883	TCGA-HT-7860-01
GBMLGG(T=662,N=1157)	Tumor	5.2468	TCGA-DU-7006-01
GBMLGG(T=662,N=1157)	Tumor	4.2646	TCGA-TQ-A7RS-01
GBMLGG(T=662,N=1157)	Tumor	3.7083	TCGA-DU-7009-01
GBMLGG(T=662,N=1157)	Tumor	3.9847	TCGA-DU-7010-01
GBMLGG(T=662,N=1157)	Tumor	4.481	TCGA-QH-A6X3-01
GBMLGG(T=662,N=1157)	Tumor	4.001	TCGA-DU-8164-01
GBMLGG(T=662,N=1157)	Tumor	3.9185	TCGA-DU-7018-01
GBMLGG(T=662,N=1157)	Tumor	4.1219	TCGA-R8-A73M-01
GBMLGG(T=662,N=1157)	Tumor	4.1994	TCGA-DB-A75L-01
GBMLGG(T=662,N=1157)	Tumor	4.3889	TCGA-RY-A843-01
GBMLGG(T=662,N=1157)	Tumor	5.044	TCGA-HT-7693-01
GBMLGG(T=662,N=1157)	Tumor	5.0321	TCGA-DU-A76L-01
GBMLGG(T=662,N=1157)	Tumor	5.6851	TCGA-28-5220-01
GBMLGG(T=662,N=1157)	Tumor	3.8827	TCGA-HT-7472-01
GBMLGG(T=662,N=1157)	Tumor	6.1659	TCGA-14-0817-01
GBMLGG(T=662,N=1157)	Tumor	5.3363	TCGA-12-1597-01
GBMLGG(T=662,N=1157)	Tumor	4.905	TCGA-06-2570-01
GBMLGG(T=662,N=1157)	Tumor	3.981	TCGA-TQ-A8XE-01
GBMLGG(T=662,N=1157)	Tumor	4.774	TCGA-HT-A616-01
GBMLGG(T=662,N=1157)	Tumor	4.6888	TCGA-FG-A4MY-01
GBMLGG(T=662,N=1157)	Tumor	4.3862	TCGA-HT-7681-01
GBMLGG(T=662,N=1157)	Tumor	3.5766	TCGA-CS-5390-01
GBMLGG(T=662,N=1157)	Tumor	3.7345	TCGA-DU-A6S2-01
GBMLGG(T=662,N=1157)	Tumor	5.2642	TCGA-P5-A5EW-01
GBMLGG(T=662,N=1157)	Tumor	4.2457	TCGA-DU-7309-01
GBMLGG(T=662,N=1157)	Tumor	4.8748	TCGA-FG-A87N-01
GBMLGG(T=662,N=1157)	Tumor	3.4713	TCGA-DB-A4XH-01
GBMLGG(T=662,N=1157)	Tumor	5.4764	TCGA-HT-7485-01
GBMLGG(T=662,N=1157)	Tumor	5.91337	TCGA-06-0211-01
GBMLGG(T=662,N=1157)	Tumor	4.8625	TCGA-VV-A86M-01
GBMLGG(T=662,N=1157)	Tumor	4.2343	TCGA-HT-7468-01
GBMLGG(T=662,N=1157)	Tumor	4.7608	TCGA-02-2483-01
GBMLGG(T=662,N=1157)	Tumor	3.8857	TCGA-HT-7677-01
GBMLGG(T=662,N=1157)	Tumor	4.437	TCGA-VW-A7QS-01
GBMLGG(T=662,N=1157)	Tumor	5.314	TCGA-DU-A5TY-01
GBMLGG(T=662,N=1157)	Tumor	3.9051	TCGA-HT-8109-01
GBMLGG(T=662,N=1157)	Tumor	5.35743	TCGA-06-0156-01
GBMLGG(T=662,N=1157)	Tumor	4.479	TCGA-S9-A6TZ-01
GBMLGG(T=662,N=1157)	Tumor	4.0198	TCGA-HT-7606-01
GBMLGG(T=662,N=1157)	Tumor	4.3807	TCGA-DH-5142-01
GBMLGG(T=662,N=1157)	Tumor	3.7116	TCGA-DU-7294-01
GBMLGG(T=662,N=1157)	Tumor	4.7565	TCGA-HT-7479-01
GBMLGG(T=662,N=1157)	Tumor	4.3278	TCGA-DB-5275-01
GBMLGG(T=662,N=1157)	Tumor	4.7971	TCGA-TM-A7C4-01
GBMLGG(T=662,N=1157)	Tumor	5.0264	TCGA-27-1837-01
GBMLGG(T=662,N=1157)	Tumor	4.6776	TCGA-DU-5872-01
GBMLGG(T=662,N=1157)	Tumor	4.6781	TCGA-FG-8186-01
GBMLGG(T=662,N=1157)	Tumor	5.0644	TCGA-TM-A84I-01
GBMLGG(T=662,N=1157)	Tumor	4.8827	TCGA-S9-A6U6-01
GBMLGG(T=662,N=1157)	Tumor	4.1392	TCGA-E1-5305-01
GBMLGG(T=662,N=1157)	Tumor	5.0401	TCGA-DU-6395-01
GBMLGG(T=662,N=1157)	Tumor	5.9864	TCGA-28-5204-01
GBMLGG(T=662,N=1157)	Tumor	4.7772	TCGA-TM-A84T-01
GBMLGG(T=662,N=1157)	Tumor	5.1069	TCGA-HT-7879-01
GBMLGG(T=662,N=1157)	Tumor	4.5693	TCGA-S9-A7IZ-01
GBMLGG(T=662,N=1157)	Tumor	4.6999	TCGA-HT-7602-01
GBMLGG(T=662,N=1157)	Tumor	5.3331	TCGA-32-5222-01
GBMLGG(T=662,N=1157)	Tumor	5.5138	TCGA-DU-A7TJ-01
GBMLGG(T=662,N=1157)	Tumor	5.6059	TCGA-28-5209-01
GBMLGG(T=662,N=1157)	Tumor	3.3842	TCGA-P5-A77W-01
GBMLGG(T=662,N=1157)	Tumor	4.5336	TCGA-27-2519-01
GBMLGG(T=662,N=1157)	Tumor	5.6946	TCGA-CS-6186-01
GBMLGG(T=662,N=1157)	Tumor	4.8223	TCGA-DU-7008-01
GBMLGG(T=662,N=1157)	Tumor	5.1807	TCGA-14-0790-01
GBMLGG(T=662,N=1157)	Tumor	4.5072	TCGA-P5-A5EU-01
GBMLGG(T=662,N=1157)	Tumor	4.1652	TCGA-HT-7688-01
GBMLGG(T=662,N=1157)	Tumor	4.9146	TCGA-DU-A7T8-01
GBMLGG(T=662,N=1157)	Tumor	3.8847	TCGA-DB-A64U-01
GBMLGG(T=662,N=1157)	Tumor	4.5892	TCGA-HT-A61C-01
GBMLGG(T=662,N=1157)	Tumor	5.0471	TCGA-12-0821-01
GBMLGG(T=662,N=1157)	Tumor	5.3879	TCGA-19-2619-01
GBMLGG(T=662,N=1157)	Tumor	4.3299	TCGA-F6-A8O3-01
GBMLGG(T=662,N=1157)	Tumor	4.9364	TCGA-DB-A64O-01
GBMLGG(T=662,N=1157)	Tumor	4.0497	TCGA-R8-A6ML-01
GBMLGG(T=662,N=1157)	Tumor	4.95	TCGA-DU-A5TT-01
GBMLGG(T=662,N=1157)	Tumor	5.1277	TCGA-27-1835-01
GBMLGG(T=662,N=1157)	Tumor	4.4033	TCGA-HT-8111-01
GBMLGG(T=662,N=1157)	Tumor	3.8421	TCGA-S9-A7QZ-01
GBMLGG(T=662,N=1157)	Tumor	5.1823	TCGA-12-0619-01
GBMLGG(T=662,N=1157)	Tumor	5.6168	TCGA-06-0168-01
GBMLGG(T=662,N=1157)	Tumor	4.7893	TCGA-IK-7675-01
GBMLGG(T=662,N=1157)	Tumor	4.63	TCGA-TQ-A7RW-01
GBMLGG(T=662,N=1157)	Tumor	3.7646	TCGA-TQ-A7RU-01
GBMLGG(T=662,N=1157)	Tumor	5.281	TCGA-27-2528-01
GBMLGG(T=662,N=1157)	Tumor	4.4556	TCGA-HT-7470-01
GBMLGG(T=662,N=1157)	Tumor	4.6445	TCGA-HT-8108-01
GBMLGG(T=662,N=1157)	Tumor	4.5079	TCGA-DB-A4XE-01
GBMLGG(T=662,N=1157)	Tumor	5.7173	TCGA-HT-A4DS-01
GBMLGG(T=662,N=1157)	Tumor	4.4913	TCGA-E1-A7YU-01
GBMLGG(T=662,N=1157)	Tumor	5.1647	TCGA-DU-8158-01
GBMLGG(T=662,N=1157)	Tumor	4.8197	TCGA-HT-7474-01
GBMLGG(T=662,N=1157)	Tumor	5.1575	TCGA-DH-5143-01
GBMLGG(T=662,N=1157)	Tumor	4.9089	TCGA-TQ-A7RJ-01
GBMLGG(T=662,N=1157)	Tumor	4.4183	TCGA-TM-A84J-01
GBMLGG(T=662,N=1157)	Tumor	4.5904	TCGA-E1-A7YD-01
GBMLGG(T=662,N=1157)	Tumor	4.026	TCGA-S9-A7QY-01
GBMLGG(T=662,N=1157)	Tumor	4.4074	TCGA-P5-A731-01
GBMLGG(T=662,N=1157)	Tumor	4.4122	TCGA-E1-A7YE-01
GBMLGG(T=662,N=1157)	Tumor	4.66	TCGA-HW-8321-01
GBMLGG(T=662,N=1157)	Tumor	3.992	TCGA-HT-8010-01
GBMLGG(T=662,N=1157)	Tumor	5.0206	TCGA-DB-5270-01
GBMLGG(T=662,N=1157)	Tumor	3.6972	TCGA-HT-A5R9-01
GBMLGG(T=662,N=1157)	Tumor	4.4189	TCGA-KT-A74X-01
GBMLGG(T=662,N=1157)	Tumor	4.6456	TCGA-HT-A74K-01
GBMLGG(T=662,N=1157)	Tumor	4.2204	TCGA-WY-A85C-01
GBMLGG(T=662,N=1157)	Tumor	4.6364	TCGA-FG-8188-01
GBMLGG(T=662,N=1157)	Tumor	4.9435	TCGA-DU-A6S7-01
GBMLGG(T=662,N=1157)	Tumor	4.9132	TCGA-HT-7855-01
GBMLGG(T=662,N=1157)	Tumor	4.8017	TCGA-HT-8015-01
GBMLGG(T=662,N=1157)	Tumor	5.2009	TCGA-DB-A75O-01
GBMLGG(T=662,N=1157)	Tumor	3.3842	TCGA-S9-A6TY-01
GBMLGG(T=662,N=1157)	Tumor	4.3328	TCGA-DU-A7TB-01
GBMLGG(T=662,N=1157)	Tumor	5.2342	TCGA-HT-7604-01
GBMLGG(T=662,N=1157)	Tumor	4.523	TCGA-HT-7884-01
GBMLGG(T=662,N=1157)	Tumor	5.3858	TCGA-28-5215-01
GBMLGG(T=662,N=1157)	Tumor	4.0567	TCGA-QH-A6CY-01
GBMLGG(T=662,N=1157)	Tumor	5.2668	TCGA-S9-A6WM-01
GBMLGG(T=662,N=1157)	Tumor	4.8064	TCGA-CS-6667-01
GBMLGG(T=662,N=1157)	Tumor	5.9869	TCGA-28-5218-01
GBMLGG(T=662,N=1157)	Tumor	5.8069	TCGA-QH-A6CV-01
GBMLGG(T=662,N=1157)	Tumor	4.1547	TCGA-VM-A8CE-01
GBMLGG(T=662,N=1157)	Tumor	4.8876	TCGA-DB-A64X-01
GBMLGG(T=662,N=1157)	Tumor	5.605	TCGA-P5-A72U-01
GBMLGG(T=662,N=1157)	Tumor	4.3097	TCGA-DB-A75K-01
GBMLGG(T=662,N=1157)	Tumor	3.6838	TCGA-DU-6410-01
GBMLGG(T=662,N=1157)	Tumor	5.254	TCGA-14-1825-01
GBMLGG(T=662,N=1157)	Tumor	5.0392	TCGA-E1-5307-01
GBMLGG(T=662,N=1157)	Tumor	4.0392	TCGA-S9-A7IY-01
GBMLGG(T=662,N=1157)	Tumor	3.958	TCGA-P5-A781-01
GBMLGG(T=662,N=1157)	Tumor	5.2001	TCGA-DU-6405-01
GBMLGG(T=662,N=1157)	Tumor	4.837	TCGA-06-0129-01
GBMLGG(T=662,N=1157)	Tumor	5.033	TCGA-DU-5852-01
GBMLGG(T=662,N=1157)	Tumor	4.927	TCGA-FG-A6J3-01
GBMLGG(T=662,N=1157)	Tumor	5.3527	TCGA-CS-5397-01
GBMLGG(T=662,N=1157)	Tumor	4.9065	TCGA-FG-A70Y-01
GBMLGG(T=662,N=1157)	Tumor	4.7187	TCGA-FG-7643-01
GBMLGG(T=662,N=1157)	Tumor	5.3352	TCGA-06-5859-01
GBMLGG(T=662,N=1157)	Tumor	4.5473	TCGA-TM-A84C-01
GBMLGG(T=662,N=1157)	Tumor	3.9079	TCGA-WY-A85E-01
GBMLGG(T=662,N=1157)	Tumor	5.322	TCGA-28-1747-01
GBMLGG(T=662,N=1157)	Tumor	6.1755	TCGA-28-2499-01
GBMLGG(T=662,N=1157)	Tumor	5.2254	TCGA-HW-A5KM-01
GBMLGG(T=662,N=1157)	Tumor	5.1615	TCGA-32-1980-01
GBMLGG(T=662,N=1157)	Tumor	4.0488	TCGA-DU-7298-01
GBMLGG(T=662,N=1157)	Tumor	3.8541	TCGA-FG-7637-01
GBMLGG(T=662,N=1157)	Tumor	3.7678	TCGA-QH-A65R-01
GBMLGG(T=662,N=1157)	Tumor	5.0242	TCGA-FG-A60J-01
GBMLGG(T=662,N=1157)	Tumor	4.2616	TCGA-FG-8189-01
GBMLGG(T=662,N=1157)	Tumor	4.7356	TCGA-P5-A5EY-01
GBMLGG(T=662,N=1157)	Tumor	5.251	TCGA-06-2564-01
GBMLGG(T=662,N=1157)	Tumor	5.5454	TCGA-06-5408-01
GBMLGG(T=662,N=1157)	Tumor	5.1363	TCGA-27-1832-01
GBMLGG(T=662,N=1157)	Tumor	6.0239	TCGA-14-1829-01
GBMLGG(T=662,N=1157)	Tumor	4.1563	TCGA-QH-A6X5-01
GBMLGG(T=662,N=1157)	Tumor	5.4986	TCGA-32-2615-01
GBMLGG(T=662,N=1157)	Tumor	5.9665	TCGA-06-0158-01
GBMLGG(T=662,N=1157)	Tumor	4.2181	TCGA-HT-7605-01
GBMLGG(T=662,N=1157)	Tumor	4.1515	TCGA-DU-6394-01
GBMLGG(T=662,N=1157)	Tumor	4.8515	TCGA-S9-A6WO-01
GBMLGG(T=662,N=1157)	Tumor	5.3519	TCGA-28-5216-01
GBMLGG(T=662,N=1157)	Tumor	4.6933	TCGA-WY-A859-01
GBMLGG(T=662,N=1157)	Tumor	4.9213	TCGA-WY-A85B-01
GBMLGG(T=662,N=1157)	Tumor	3.8964	TCGA-S9-A6UB-01
GBMLGG(T=662,N=1157)	Tumor	6.0938	TCGA-41-2572-01
GBMLGG(T=662,N=1157)	Tumor	5.1056	TCGA-DU-7290-01
GBMLGG(T=662,N=1157)	Tumor	3.6983	TCGA-P5-A5F6-01
GBMLGG(T=662,N=1157)	Tumor	4.8758	TCGA-DU-6407-01
GBMLGG(T=662,N=1157)	Tumor	6.0418	TCGA-02-0055-01
GBMLGG(T=662,N=1157)	Tumor	4.4823	TCGA-HT-7601-01
GBMLGG(T=662,N=1157)	Tumor	5.1815	TCGA-32-2634-01
GBMLGG(T=662,N=1157)	Tumor	4.4945	TCGA-DU-6403-01
GBMLGG(T=662,N=1157)	Tumor	3.9156	TCGA-DB-A4XG-01
GBMLGG(T=662,N=1157)	Tumor	4.067	TCGA-DB-A64R-01
GBMLGG(T=662,N=1157)	Tumor	4.0909	TCGA-HW-7487-01
GBMLGG(T=662,N=1157)	Tumor	4.0816	TCGA-S9-A7J1-01
GBMLGG(T=662,N=1157)	Tumor	4.7415	TCGA-FG-6689-01
GBMLGG(T=662,N=1157)	Tumor	5.1027	TCGA-HT-8011-01
GBMLGG(T=662,N=1157)	Tumor	5.856	TCGA-E1-A7YJ-01
GBMLGG(T=662,N=1157)	Tumor	5.109	TCGA-06-5411-01
GBMLGG(T=662,N=1157)	Tumor	4.7372	TCGA-DB-5277-01
GBMLGG(T=662,N=1157)	Tumor	5.2338	TCGA-HT-7690-01
GBMLGG(T=662,N=1157)	Tumor	3.8126	TCGA-TM-A84M-01
GBMLGG(T=662,N=1157)	Tumor	3.8116	TCGA-HT-8105-01
GBMLGG(T=662,N=1157)	Tumor	5.4819	TCGA-06-0744-01
GBMLGG(T=662,N=1157)	Tumor	5.8555	TCGA-76-4928-01
GBMLGG(T=662,N=1157)	Tumor	5.6227	TCGA-06-0644-01
GBMLGG(T=662,N=1157)	Tumor	4.347	TCGA-E1-A7YY-01
GBMLGG(T=662,N=1157)	Tumor	4.1294	TCGA-HT-A619-01
GBMLGG(T=662,N=1157)	Tumor	3.8521	TCGA-E1-5318-01
GBMLGG(T=662,N=1157)	Tumor	3.7646	TCGA-P5-A737-01
GBMLGG(T=662,N=1157)	Tumor	4.9151	TCGA-14-0871-01
GBMLGG(T=662,N=1157)	Tumor	4.1899	TCGA-RY-A83Y-01
GBMLGG(T=662,N=1157)	Tumor	5.0277	TCGA-08-0386-01
GBMLGG(T=662,N=1157)	Tumor	4.7242	TCGA-HT-8564-01
GBMLGG(T=662,N=1157)	Tumor	5.2445	TCGA-HT-7686-01
GBMLGG(T=662,N=1157)	Tumor	4.3597	TCGA-E1-A7YM-01
GBMLGG(T=662,N=1157)	Tumor	5.0691	TCGA-DU-7301-01
GBMLGG(T=662,N=1157)	Tumor	5.1086	TCGA-S9-A6UA-01
GBMLGG(T=662,N=1157)	Tumor	5.565	TCGA-32-2632-01
GBMLGG(T=662,N=1157)	Tumor	4.0401	TCGA-TM-A84G-01
GBMLGG(T=662,N=1157)	Tumor	4.3695	TCGA-VV-A829-01
GBMLGG(T=662,N=1157)	Tumor	4.7735	TCGA-DH-A66B-01
GBMLGG(T=662,N=1157)	Tumor	4.9146	TCGA-HT-A5R7-01
GBMLGG(T=662,N=1157)	Tumor	3.4958	TCGA-CS-5394-01
GBMLGG(T=662,N=1157)	Tumor	3.9765	TCGA-HT-A61A-01
GBMLGG(T=662,N=1157)	Tumor	3.773	TCGA-HT-7877-01
GBMLGG(T=662,N=1157)	Tumor	4.3986	TCGA-HT-A618-01
GBMLGG(T=662,N=1157)	Tumor	5.464	TCGA-06-0882-01
GBMLGG(T=662,N=1157)	Tumor	4.5311	TCGA-DU-6542-01
GBMLGG(T=662,N=1157)	Tumor	5.3056	TCGA-41-4097-01
GBMLGG(T=662,N=1157)	Tumor	4.6832	TCGA-QH-A6CS-01
GBMLGG(T=662,N=1157)	Tumor	3.9792	TCGA-W9-A837-01
GBMLGG(T=662,N=1157)	Tumor	5.673	TCGA-16-1045-01
GBMLGG(T=662,N=1157)	Tumor	4.853	TCGA-DU-7306-01
GBMLGG(T=662,N=1157)	Tumor	4.9737	TCGA-VM-A8CH-01
GBMLGG(T=662,N=1157)	Tumor	4.3646	TCGA-QH-A6X9-01
GBMLGG(T=662,N=1157)	Tumor	4.0506	TCGA-E1-5311-01
GBMLGG(T=662,N=1157)	Tumor	4.7274	TCGA-S9-A6U0-01
GBMLGG(T=662,N=1157)	Tumor	3.6623	TCGA-QH-A6CZ-01
GBMLGG(T=662,N=1157)	Tumor	5.0943	TCGA-HT-7611-01
GBMLGG(T=662,N=1157)	Tumor	4.8851	TCGA-19-2625-01
GBMLGG(T=662,N=1157)	Tumor	4.7698	TCGA-WH-A86K-01
GBMLGG(T=662,N=1157)	Tumor	3.9031	TCGA-DH-5141-01
GBMLGG(T=662,N=1157)	Tumor	5.7682	TCGA-FG-A60L-01
GBMLGG(T=662,N=1157)	Tumor	4.9801	TCGA-DB-5280-01
GBMLGG(T=662,N=1157)	Tumor	5.0777	TCGA-S9-A7IX-01
GBMLGG(T=662,N=1157)	Tumor	4.7819	TCGA-HT-A5RC-01
GBMLGG(T=662,N=1157)	Tumor	4.4848	TCGA-FG-5965-01
GBMLGG(T=662,N=1157)	Tumor	4.6451	TCGA-FG-7634-01
GBMLGG(T=662,N=1157)	Tumor	4.5632	TCGA-S9-A6TU-01
GBMLGG(T=662,N=1157)	Tumor	5.2122	TCGA-27-1834-01
GBMLGG(T=662,N=1157)	Tumor	4.4919	TCGA-DU-7007-01
GBMLGG(T=662,N=1157)	Tumor	4.856	TCGA-HW-7490-01
GBMLGG(T=662,N=1157)	Tumor	4.8871	TCGA-TM-A7C3-01
GBMLGG(T=662,N=1157)	Tumor	4.0833	TCGA-CS-6668-01
GBMLGG(T=662,N=1157)	Tumor	4.844	TCGA-S9-A6WG-01
GBMLGG(T=662,N=1157)	Tumor	5.093	TCGA-DU-8165-01
GBMLGG(T=662,N=1157)	Tumor	3.6486	TCGA-HT-7692-01
GBMLGG(T=662,N=1157)	Tumor	4.1285	TCGA-TQ-A7RM-01
GBMLGG(T=662,N=1157)	Tumor	4.2335	TCGA-HT-7607-01
GBMLGG(T=662,N=1157)	Tumor	4.4588	TCGA-HT-7880-01
GBMLGG(T=662,N=1157)	Tumor	4.8535	TCGA-DU-8161-01
GBMLGG(T=662,N=1157)	Tumor	3.927	TCGA-HT-7467-01
GBMLGG(T=662,N=1157)	Tumor	5.9789	TCGA-VM-A8CD-01
GBMLGG(T=662,N=1157)	Tumor	4.7055	TCGA-DU-6401-01
GBMLGG(T=662,N=1157)	Tumor	4.9074	TCGA-DU-6396-01
GBMLGG(T=662,N=1157)	Tumor	4.8182	TCGA-HT-A74H-01
GBMLGG(T=662,N=1157)	Tumor	4.4196	TCGA-41-2571-01
GBMLGG(T=662,N=1157)	Tumor	5.3523	TCGA-19-4065-01
GBMLGG(T=662,N=1157)	Tumor	5.3495	TCGA-14-0781-01
GBMLGG(T=662,N=1157)	Tumor	4.7377	TCGA-HT-7483-01
GBMLGG(T=662,N=1157)	Tumor	4.0713	TCGA-HT-7620-01
GBMLGG(T=662,N=1157)	Tumor	3.8581	TCGA-HT-7480-01
GBMLGG(T=662,N=1157)	Tumor	5.6206	TCGA-06-0157-01
GBMLGG(T=662,N=1157)	Tumor	4.3206	TCGA-S9-A7J0-01
GBMLGG(T=662,N=1157)	Tumor	5.3992	TCGA-12-3653-01
GBMLGG(T=662,N=1157)	Tumor	5.1322	TCGA-P5-A736-01
GBMLGG(T=662,N=1157)	Tumor	4.232	TCGA-TM-A84Q-01
GBMLGG(T=662,N=1157)	Tumor	5.1314	TCGA-76-4926-01
GBMLGG(T=662,N=1157)	Tumor	5.1724	TCGA-26-5133-01
GBMLGG(T=662,N=1157)	Tumor	5.3681	TCGA-06-2562-01
GBMLGG(T=662,N=1157)	Tumor	3.9118	TCGA-RY-A847-01
GBMLGG(T=662,N=1157)	Tumor	4.1186	TCGA-E1-A7YV-01
GBMLGG(T=662,N=1157)	Tumor	3.5923	TCGA-TQ-A7RQ-01
GBMLGG(T=662,N=1157)	Tumor	4.756	TCGA-FG-8191-01
GBMLGG(T=662,N=1157)	Tumor	4.9658	TCGA-E1-A7YW-01
GBMLGG(T=662,N=1157)	Tumor	4.2056	TCGA-DB-5278-01
GBMLGG(T=662,N=1157)	Tumor	4.1053	TCGA-E1-A7YS-01
GBMLGG(T=662,N=1157)	Tumor	4.1053	TCGA-HT-7695-01
GBMLGG(T=662,N=1157)	Tumor	4.7192	TCGA-DU-A7TC-01
GBMLGG(T=662,N=1157)	Tumor	3.9636	TCGA-HW-7491-01
GBMLGG(T=662,N=1157)	Tumor	5.5227	TCGA-DB-A4X9-01
GBMLGG(T=662,N=1157)	Tumor	5.3024	TCGA-HT-A614-01
GBMLGG(T=662,N=1157)	Tumor	3.9783	TCGA-TQ-A7RI-01
GBMLGG(T=662,N=1157)	Tumor	5.4094	TCGA-CS-6188-01
GBMLGG(T=662,N=1157)	Tumor	3.9654	TCGA-QH-A86X-01
GBMLGG(T=662,N=1157)	Tumor	3.9636	TCGA-DU-A76R-01
GBMLGG(T=662,N=1157)	Tumor	3.9534	TCGA-DH-5144-01
GBMLGG(T=662,N=1157)	Tumor	3.9571	TCGA-DU-8168-01
GBMLGG(T=662,N=1157)	Tumor	4.7576	TCGA-VM-A8C8-01
GBMLGG(T=662,N=1157)	Tumor	5.6291	TCGA-HT-7882-01
GBMLGG(T=662,N=1157)	Tumor	4.5964	TCGA-DU-6399-01
GBMLGG(T=662,N=1157)	Tumor	4.9663	TCGA-S9-A7R7-01
GBMLGG(T=662,N=1157)	Tumor	4.0401	TCGA-41-5651-01
GBMLGG(T=662,N=1157)	Tumor	4.8625	TCGA-E1-A7Z2-01
GBMLGG(T=662,N=1157)	Tumor	4.7247	TCGA-DU-A5TP-01
GBMLGG(T=662,N=1157)	Tumor	5.0086	TCGA-06-0210-01
GBMLGG(T=662,N=1157)	Tumor	3.8095	TCGA-FG-8187-01
GBMLGG(T=662,N=1157)	Tumor	4.3965	TCGA-19-2624-01
GBMLGG(T=662,N=1157)	Tumor	3.6623	TCGA-IK-8125-01
GBMLGG(T=662,N=1157)	Tumor	4.8064	TCGA-19-5960-01
GBMLGG(T=662,N=1157)	Tumor	5.1065	TCGA-CS-6666-01
GBMLGG(T=662,N=1157)	Tumor	5.2052	TCGA-06-0686-01
GBMLGG(T=662,N=1157)	Tumor	3.7443	TCGA-TM-A7CF-01
GBMLGG(T=662,N=1157)	Tumor	4.2419	TCGA-DH-A7US-01
GBMLGG(T=662,N=1157)	Tumor	5.0027	TCGA-DU-7013-01
GBMLGG(T=662,N=1157)	Tumor	5.2672	TCGA-E1-A7Z6-01
GBMLGG(T=662,N=1157)	Tumor	4.773	TCGA-HT-7857-01
GBMLGG(T=662,N=1157)	Tumor	4.1907	TCGA-E1-5319-01
GBMLGG(T=662,N=1157)	Tumor	4.4926	TCGA-DU-A5TS-01
GBMLGG(T=662,N=1157)	Tumor	4.2951	TCGA-HT-7856-01
GBMLGG(T=662,N=1157)	Tumor	4.8253	TCGA-DU-6392-01
GBMLGG(T=662,N=1157)	Tumor	4.298	TCGA-QH-A6CU-01
GBMLGG(T=662,N=1157)	Tumor	5.2865	TCGA-DU-6404-01
GBMLGG(T=662,N=1157)	Tumor	4.2593	TCGA-VW-A8FI-01
GBMLGG(T=662,N=1157)	Tumor	3.7083	TCGA-P5-A5EZ-01
GBMLGG(T=662,N=1157)	Tumor	4.9769	TCGA-S9-A89Z-01
GBMLGG(T=662,N=1157)	Tumor	5.054	TCGA-FG-5963-01
GBMLGG(T=662,N=1157)	Tumor	4.449	TCGA-S9-A7IQ-01
GBMLGG(T=662,N=1157)	Tumor	5.124	TCGA-S9-A89V-01
GBMLGG(T=662,N=1157)	Tumor	3.8571	TCGA-DB-A64W-01
GBMLGG(T=662,N=1157)	Tumor	3.4344	TCGA-FG-A4MX-01
GBMLGG(T=662,N=1157)	Tumor	4.079	TCGA-P5-A72Z-01
GBMLGG(T=662,N=1157)	Tumor	5.5607	TCGA-06-2563-01
GBMLGG(T=662,N=1157)	Tumor	4.8182	TCGA-S9-A6U1-01
GBMLGG(T=662,N=1157)	Tumor	5.0387	TCGA-15-1444-01
GBMLGG(T=662,N=1157)	Tumor	4.3737	TCGA-32-4213-01
GBMLGG(T=662,N=1157)	Tumor	4.2227	TCGA-HT-7881-01
GBMLGG(T=662,N=1157)	Tumor	5.4226	TCGA-15-0742-01
GBMLGG(T=662,N=1157)	Tumor	5.7986	TCGA-06-0187-01
GBMLGG(T=662,N=1157)	Tumor	4.3242	TCGA-19-1390-01
GBMLGG(T=662,N=1157)	Tumor	4.5286	TCGA-QH-A65V-01
GBMLGG(T=662,N=1157)	Tumor	4.2714	TCGA-DU-A7TG-01
GBMLGG(T=662,N=1157)	Tumor	4.8475	TCGA-TQ-A7RV-01
GBMLGG(T=662,N=1157)	Tumor	3.9403	TCGA-DU-5874-01
GBMLGG(T=662,N=1157)	Tumor	4.0366	TCGA-QH-A6X4-01
GBMLGG(T=662,N=1157)	Tumor	4.1539	TCGA-VM-A8CB-01
GBMLGG(T=662,N=1157)	Tumor	3.9147	TCGA-DH-A66F-01
GBMLGG(T=662,N=1157)	Tumor	4.4615	TCGA-HT-7694-01
GBMLGG(T=662,N=1157)	Tumor	4.7898	TCGA-HT-7471-01
GBMLGG(T=662,N=1157)	Tumor	4.14	TCGA-HT-7608-01
GBMLGG(T=662,N=1157)	Tumor	5.3075	TCGA-CS-6290-01
GBMLGG(T=662,N=1157)	Tumor	4.8675	TCGA-DB-A4XD-01
GBMLGG(T=662,N=1157)	Tumor	4.8846	TCGA-TQ-A7RK-01
GBMLGG(T=662,N=1157)	Tumor	3.8905	TCGA-HT-7475-01
GBMLGG(T=662,N=1157)	Tumor	4.0816	TCGA-TQ-A7RO-01
GBMLGG(T=662,N=1157)	Tumor	4.6497	TCGA-HT-7902-01
GBMLGG(T=662,N=1157)	Tumor	5.1127	TCGA-FG-A711-01
GBMLGG(T=662,N=1157)	Tumor	5.432	TCGA-06-2557-01
GBMLGG(T=662,N=1157)	Tumor	4.7323	TCGA-DB-5276-01
GBMLGG(T=662,N=1157)	Tumor	4.061	TCGA-P5-A730-01
GBMLGG(T=662,N=1157)	Tumor	5.0273	TCGA-HT-A74O-01
GBMLGG(T=662,N=1157)	Tumor	4.9379	TCGA-HT-A74J-01
GBMLGG(T=662,N=1157)	Tumor	5.1989	TCGA-DU-5855-01
GBMLGG(T=662,N=1157)	Tumor	5.0036	TCGA-06-0878-01
GBMLGG(T=662,N=1157)	Tumor	4.706	TCGA-DH-A669-01
GBMLGG(T=662,N=1157)	Tumor	5.2854	TCGA-HT-A617-01
GBMLGG(T=662,N=1157)	Tumor	5.1571	TCGA-06-2567-01
GBMLGG(T=662,N=1157)	Tumor	5.0414	TCGA-32-2616-01
GBMLGG(T=662,N=1157)	Tumor	5.7722	TCGA-28-5208-01
GBMLGG(T=662,N=1157)	Tumor	4.7903	TCGA-28-2514-01
GBMLGG(T=662,N=1157)	Tumor	4.6866	TCGA-06-1804-01
GBMLGG(T=662,N=1157)	Tumor	4.656	TCGA-QH-A6CX-01
GBMLGG(T=662,N=1157)	Tumor	6.0275	TCGA-14-2554-01
GBMLGG(T=662,N=1157)	Tumor	4.7421	TCGA-P5-A5F4-01
GBMLGG(T=662,N=1157)	Tumor	5.2091	TCGA-DU-A5TU-01
GBMLGG(T=662,N=1157)	Tumor	5.0148	TCGA-DU-A76K-01
GBMLGG(T=662,N=1157)	Tumor	5.0653	TCGA-HT-7609-01
GBMLGG(T=662,N=1157)	Tumor	4.9951	TCGA-TQ-A7RR-01
GBMLGG(T=662,N=1157)	Tumor	4.9393	TCGA-DH-A66D-01
GBMLGG(T=662,N=1157)	Tumor	4.728	TCGA-DH-A7UV-01
GBMLGG(T=662,N=1157)	Tumor	5.23	TCGA-02-2485-01
GBMLGG(T=662,N=1157)	Tumor	4.9284	TCGA-06-5858-01
GBMLGG(T=662,N=1157)	Tumor	5.085	TCGA-FG-6690-01
GBMLGG(T=662,N=1157)	Tumor	4.322	TCGA-DB-A4XA-01
GBMLGG(T=662,N=1157)	Tumor	4.89	TCGA-DU-8167-01
GBMLGG(T=662,N=1157)	Tumor	4.3256	TCGA-QH-A65X-01
GBMLGG(T=662,N=1157)	Tumor	5.5373	TCGA-06-0178-01
GBMLGG(T=662,N=1157)	Tumor	3.6994	TCGA-P5-A780-01
GBMLGG(T=662,N=1157)	Tumor	5.2972	TCGA-E1-5302-01
GBMLGG(T=662,N=1157)	Tumor	5.6899	TCGA-14-1823-01
GBMLGG(T=662,N=1157)	Tumor	3.5274	TCGA-HW-A5KJ-01
GBMLGG(T=662,N=1157)	Tumor	4.4223	TCGA-FG-7636-01
GBMLGG(T=662,N=1157)	Tumor	5.3089	TCGA-DU-5847-01
GBMLGG(T=662,N=1157)	Tumor	5.2461	TCGA-28-2509-01
GBMLGG(T=662,N=1157)	Tumor	5.3813	TCGA-DU-6406-01
GBMLGG(T=662,N=1157)	Tumor	5.5345	TCGA-06-2558-01
GBMLGG(T=662,N=1157)	Tumor	4.9156	TCGA-06-0745-01
GBMLGG(T=662,N=1157)	Tumor	4.2457	TCGA-TM-A84B-01
GBMLGG(T=662,N=1157)	Tumor	4.8724	TCGA-DU-A76O-01
GBMLGG(T=662,N=1157)	Tumor	4.9589	TCGA-CS-4944-01
GBMLGG(T=662,N=1157)	Tumor	4.5436	TCGA-HT-7603-01
GBMLGG(T=662,N=1157)	Normal	3.4817	GTEX-13QIC-0011-R1a-SM-5O9CJ
GBMLGG(T=662,N=1157)	Normal	4.3765	GTEX-N7MS-2526-SM-26GMA
GBMLGG(T=662,N=1157)	Normal	1.412	GTEX-N7MS-2526-SM-26GMR
GBMLGG(T=662,N=1157)	Normal	4.2906	GTEX-NPJ7-0011-R6a-SM-2I3G7
GBMLGG(T=662,N=1157)	Normal	4.1772	GTEX-132Q8-3026-SM-5PNVG
GBMLGG(T=662,N=1157)	Normal	3.5994	GTEX-NPJ7-2726-SM-2I3FT
GBMLGG(T=662,N=1157)	Normal	3.9801	GTEX-13OVJ-0011-R9b-SM-5L3GD
GBMLGG(T=662,N=1157)	Normal	4.0216	GTEX-XLM4-0011-R10A-SM-4AT5P
GBMLGG(T=662,N=1157)	Normal	3.8511	GTEX-12ZZZ-0011-R10a-SM-5P9HC
GBMLGG(T=662,N=1157)	Normal	2.5137	GTEX-X4XY-0011-R8A-SM-46MVC
GBMLGG(T=662,N=1157)	Normal	3.5449	GTEX-13QJC-0011-R6a-SM-5S2VI
GBMLGG(T=662,N=1157)	Normal	3.9589	GTEX-ZUA1-0011-R8b-SM-51MST
GBMLGG(T=662,N=1157)	Normal	2.409	GTEX-13FHP-0011-R7b-SM-5LZYI
GBMLGG(T=662,N=1157)	Normal	4.2289	GTEX-11EMC-3326-SM-5P9JH
GBMLGG(T=662,N=1157)	Normal	3.9261	GTEX-13112-0011-R7b-SM-5DUVW
GBMLGG(T=662,N=1157)	Normal	4.1539	GTEX-12WSA-0011-R5b-SM-5GU5I
GBMLGG(T=662,N=1157)	Normal	3.7518	GTEX-ZF28-3026-SM-4WKHP
GBMLGG(T=662,N=1157)	Normal	4.251	GTEX-ZUA1-0011-R7b-SM-4YCDP
GBMLGG(T=662,N=1157)	Normal	3.0393	GTEX-11ZVC-0011-R9a-SM-57WC5
GBMLGG(T=662,N=1157)	Normal	3.8857	GTEX-WZTO-0011-R4A-SM-3NMC7
GBMLGG(T=662,N=1157)	Normal	3.9534	GTEX-NPJ7-0011-R11A-SM-2I3E8
GBMLGG(T=662,N=1157)	Normal	4.0575	GTEX-13OVL-0011-R6a-SM-5L3G4
GBMLGG(T=662,N=1157)	Normal	3.8054	GTEX-13NYB-0011-R1b-SM-5KM4F
GBMLGG(T=662,N=1157)	Normal	4.7442	GTEX-WHSE-0011-R8A-SM-3P5Z1
GBMLGG(T=662,N=1157)	Normal	3.6101	GTEX-T6MN-0011-R4A-SM-32QPG
GBMLGG(T=662,N=1157)	Normal	3.5187	GTEX-ZDXO-0011-R1a-SM-4WKF4
[truncated: 20,048 more rows]
